# Supplementary material
Source: PubMed Central journal article supplement (PMC4512672)
Supplement: NIHMS550298-supplement-1.pdf [file NIHMS550298-supplement-1.pdf]

## Supplementary Information

### **Label-Assisted Mass Spectrometry for the Acceleration of Reaction Discovery and Optimization**

Jaime R. Cabrera-Pardo,<sup>1</sup> David I. Chai,<sup>1</sup> Song Liu,<sup>1</sup> Milan Mrksich<sup>2</sup> and Sergey A. Kozmin\*<sup>1</sup>

Chicago Tri-Institutional Center for Chemical Methods and Library Development

<sup>1</sup>Department of Chemistry, University of Chicago, Chicago, IL 60637, USA

<sup>2</sup>Department of Chemistry, Northwestern University, Evanston, IL 60208, USA

\*e-mail: [skozmin@uchicago.edu](mailto:skozmin@uchicago.edu)

## Table of Contents

|                                                       |    |
|-------------------------------------------------------|----|
| <b>Supplementary Figures</b>                          | 3  |
| <b>Supplementary Tables</b>                           | 6  |
| <b>Supplementary Methods</b>                          |    |
| General procedures for organic synthesis              | 8  |
| Experimental procedures and compound characterization | 8  |
| <b>Supplementary References</b>                       | 19 |
| <b>Supplementary Data</b>                             |    |
| NMR data                                              | 20 |
| X-Ray crystallographic data                           | 55 |

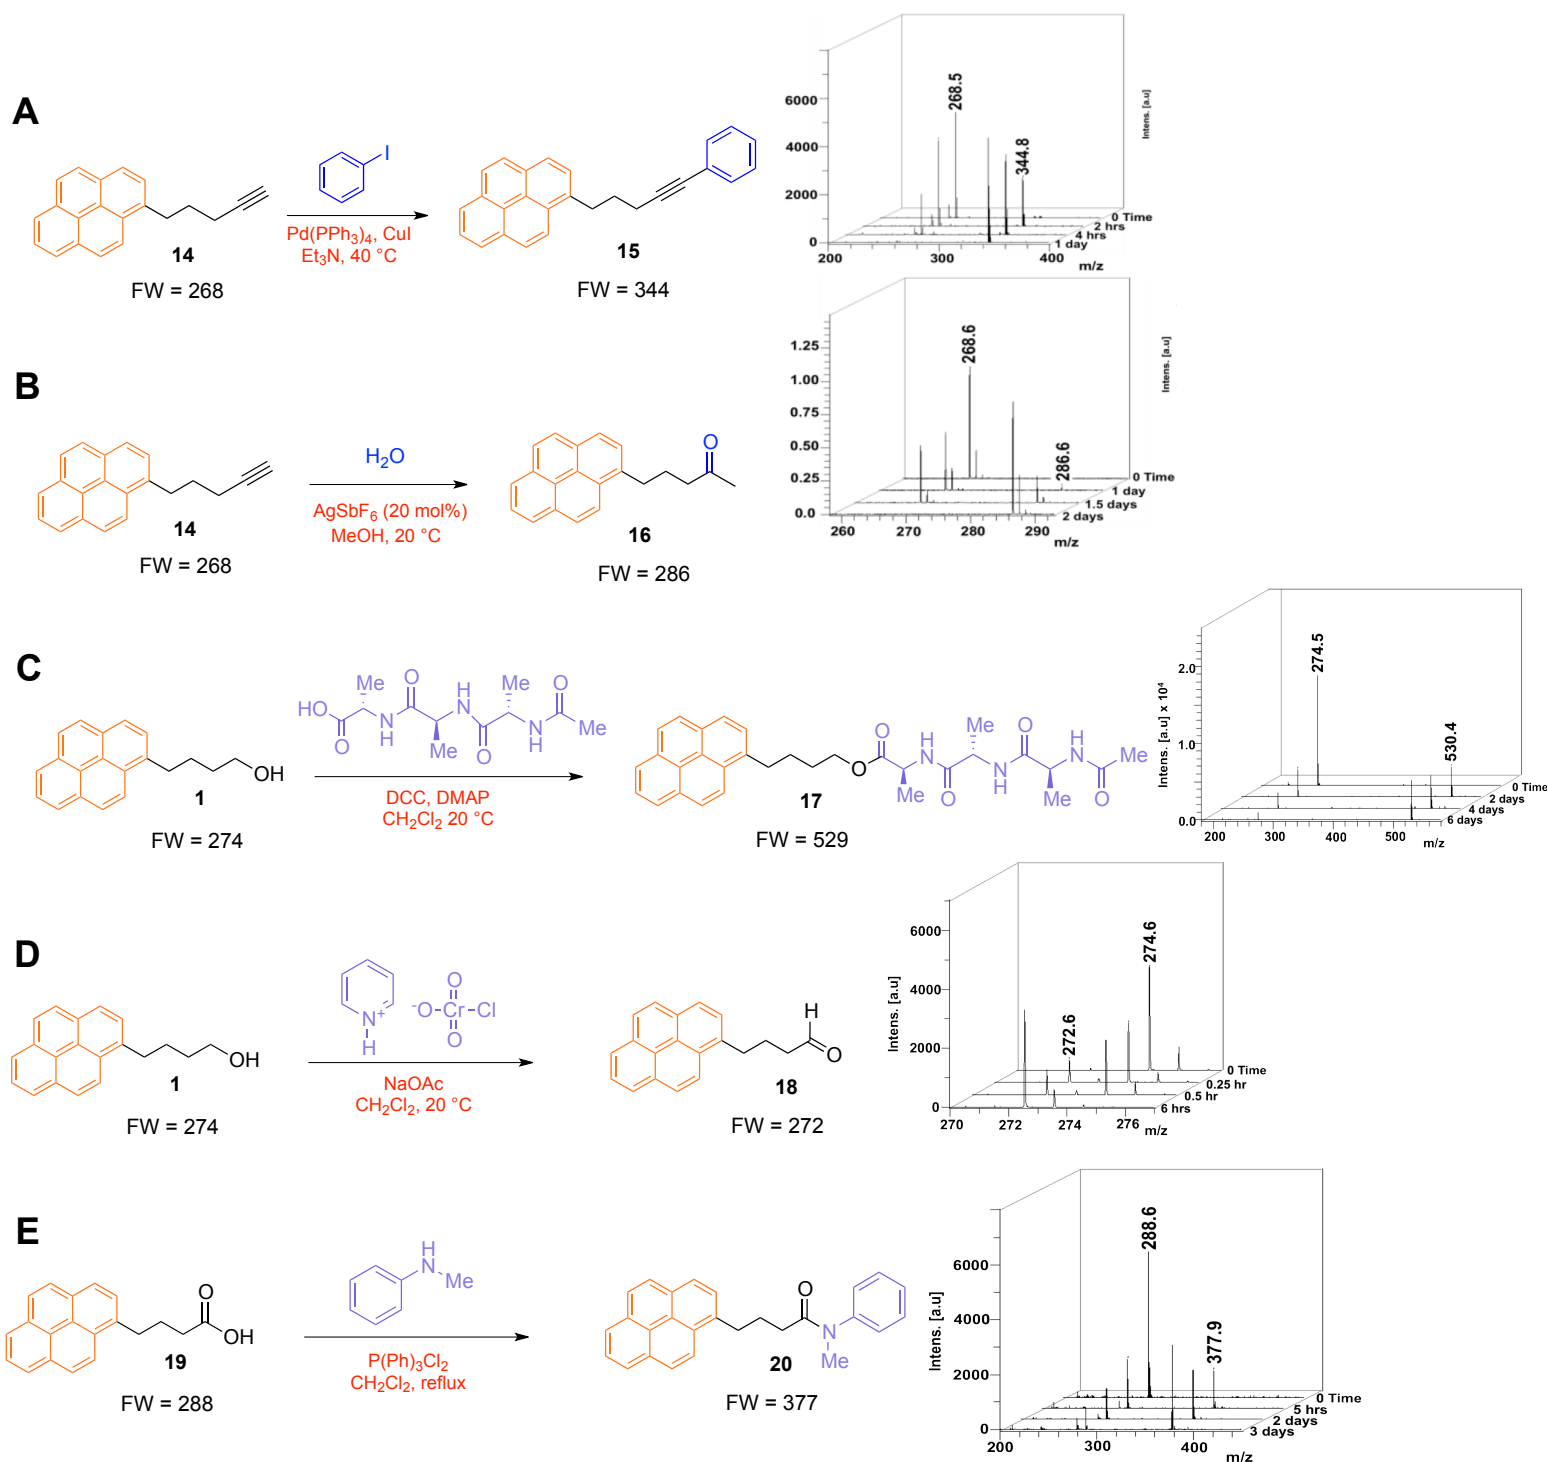

**Supplementary Figure S1. Use of LA-LDI-TOF-MS to monitor progress of known reactions. A,** Reaction scheme and MS spectra for conversion of terminal alkyne **14** to Sonogashira product **15**. **B,** Reaction scheme and MS spectra for conversion of terminal alkyne **14** to ketone **16**. **C,** Reaction scheme and MS spectra for conversion of terminal alcohol **1** to ester **17**. **D,** Reaction scheme and MS spectra for conversion of terminal alcohol **1** to aldehyde **18**. **E,** Reaction scheme and MS spectra for conversion of carboxylic acid **19** to amide **20**.

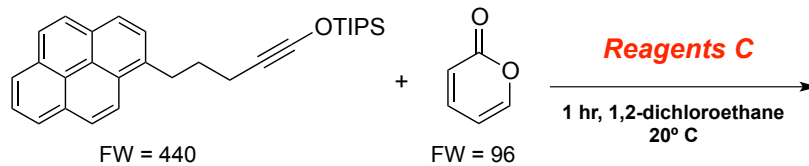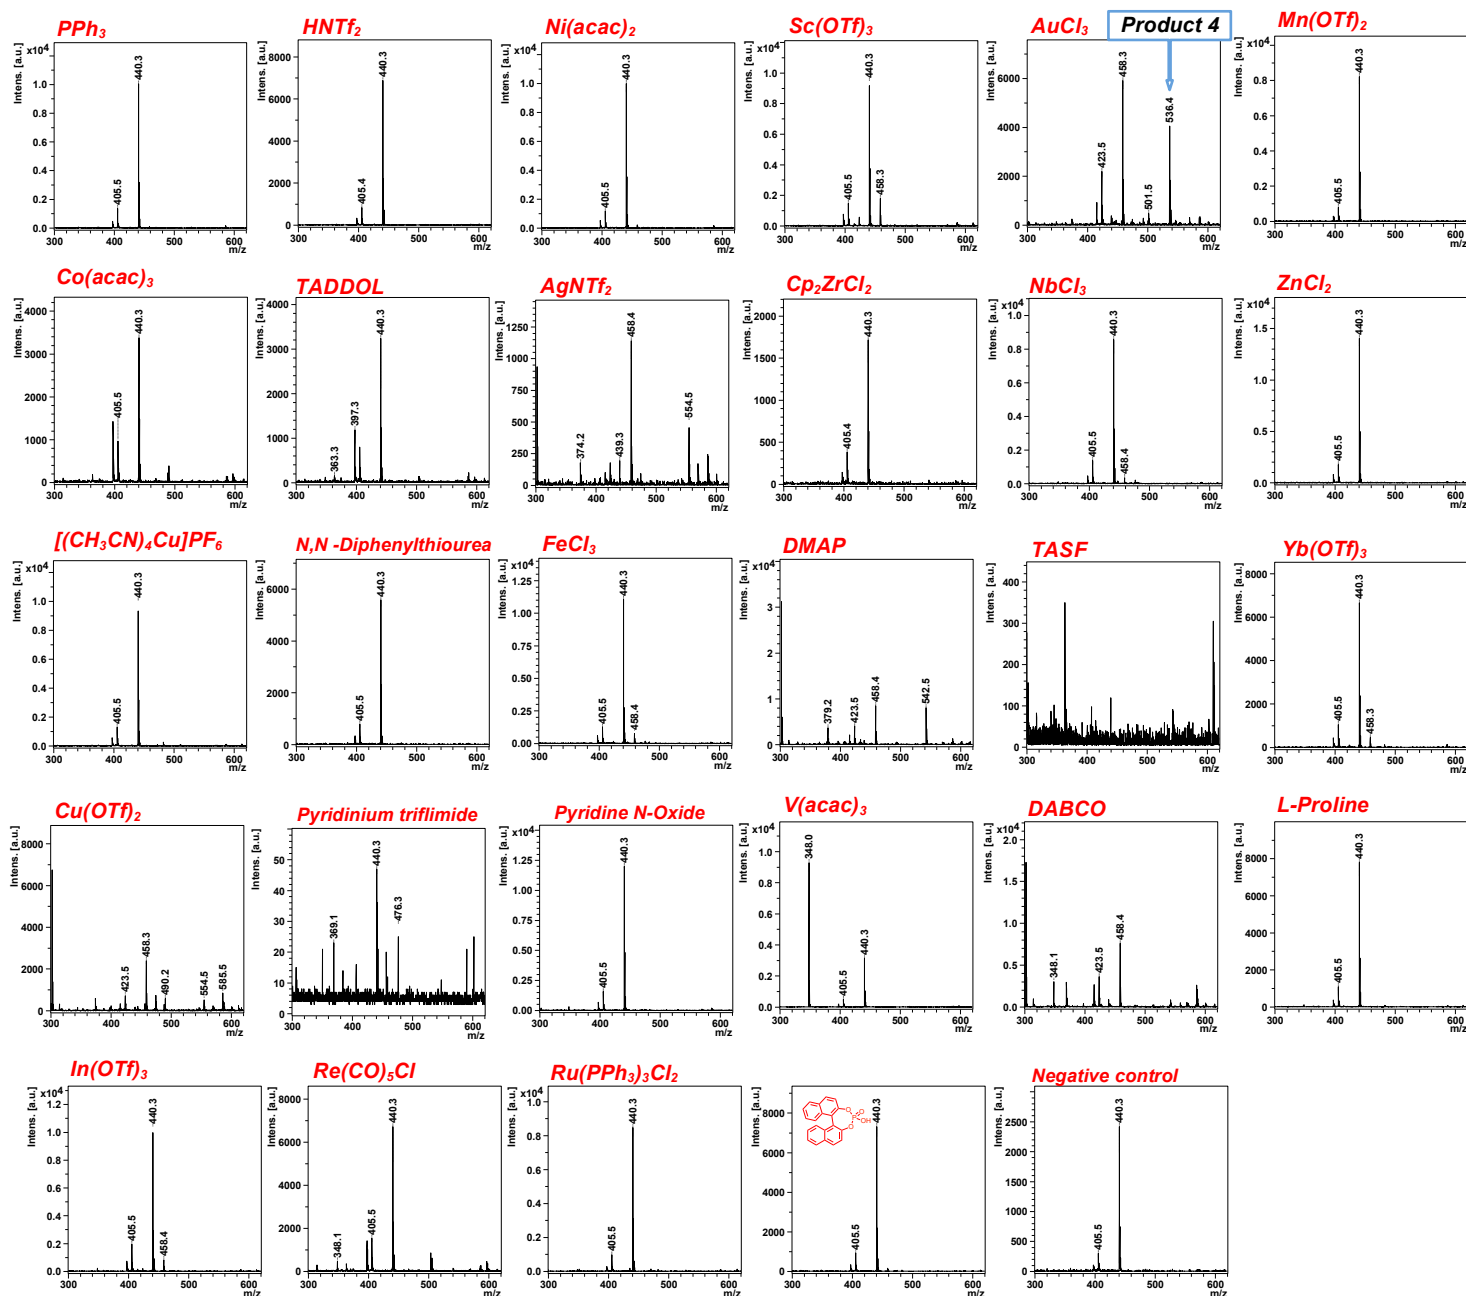

**Supplementary Figure S2. Representative mass spectrometry data.** Reaction scheme and MS spectra for each of the 28 reagents and negative solvent control. Formation of product 4 observed using  $\text{AuCl}_3$ .

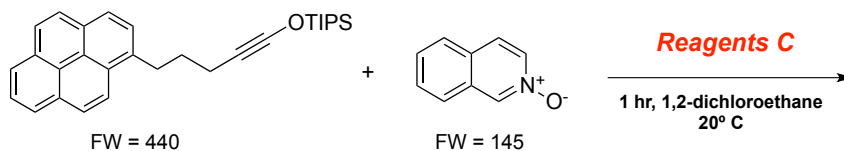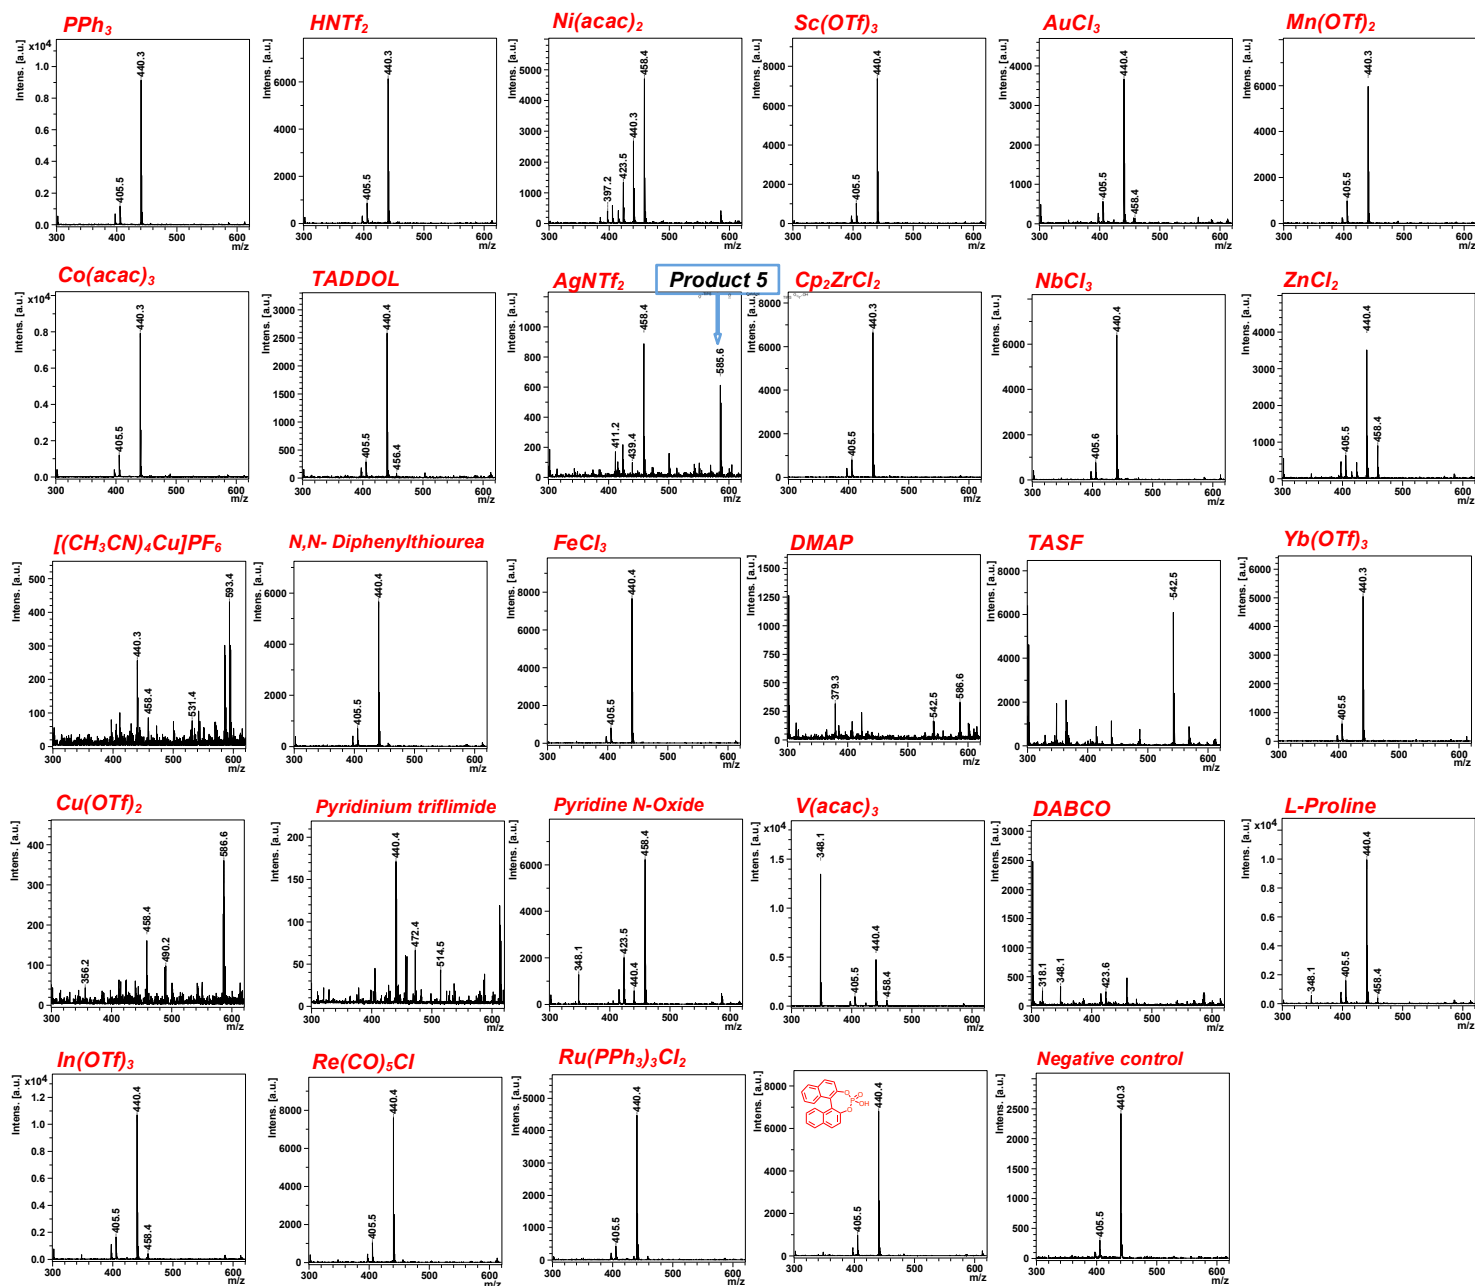

**Supplementary Figure S3. Representative mass spectrometry data.** Reaction scheme and MS spectra for each of the 28 reagents and negative solvent control. Formation of product 5 observed using AgNTf<sub>2</sub>.

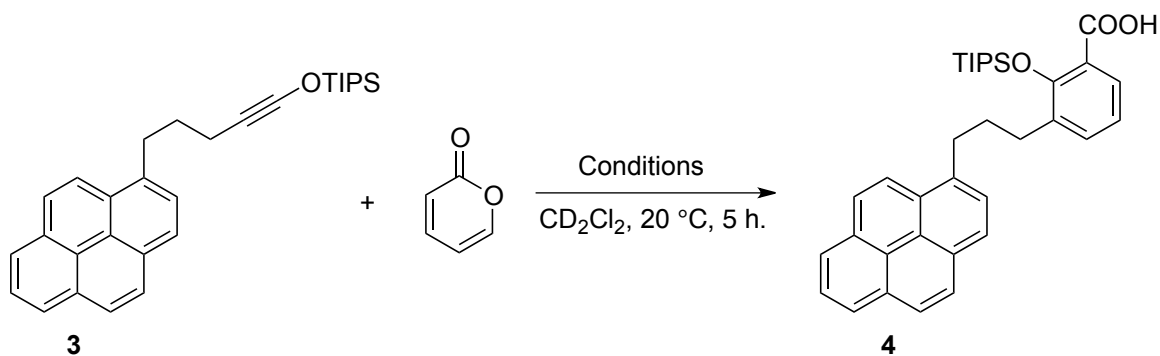

| Entry          | Catalyst                            | Catalyst Loading | Conversion (%) <sup>a</sup> | Conversion (%) <sup>b</sup> |
|----------------|-------------------------------------|------------------|-----------------------------|-----------------------------|
| 1              | AuCl <sub>3</sub>                   | 3 mol%           | 20.5                        | 19.9                        |
| 2              | PPH <sub>3</sub> AuNTf <sub>2</sub> | 3 mol%           | 1.63                        | 1.66                        |
| 3              |                                     | 1 mol%           | 0.0                         | 0.0                         |
| 4              |                                     | 1 mol%           | 48.9                        | 50.0                        |
| 5 <sup>c</sup> |                                     | 1 mol%           | 81.0                        | 80.9                        |

Siloxy alkyne concentration 0.1 M.

<sup>a</sup> Conversion to **4** calculated by LA-LDI-MS.

<sup>b</sup> Conversion to **4** calculated by analysis of the crude reaction mixtures using <sup>1</sup>H NMR spectroscopy.

<sup>c</sup> Further optimization of the reaction gave 2.5 mol% of **8** and 0.3 M of siloxy alkyne as the best conditions. (> 95 % yield determined by 500 MHz <sup>1</sup>H NMR using an internal standard).

**Supplementary Table S1.** Catalyst screen of benzannulation reaction between siloxy alkyne and 2-pyrone.

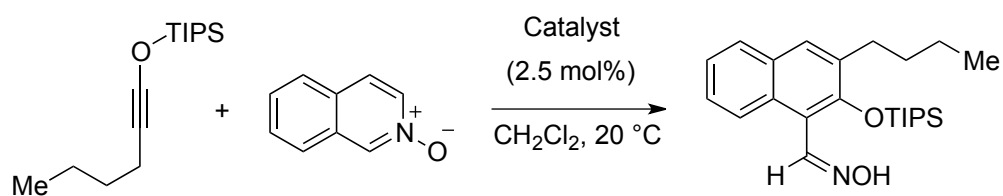

| Entry | Catalyst                            | Concentration of siloxy alkyne | Yield, % <sup>a</sup> |
|-------|-------------------------------------|--------------------------------|-----------------------|
| 1     | AgNTf <sub>2</sub>                  | 0.10 M                         | 63                    |
| 2     | AgSbF <sub>6</sub>                  | 0.10 M                         | 34                    |
| 3     | AuCl <sub>3</sub>                   | 0.10 M                         | 47                    |
| 4     | Ph <sub>3</sub> PAuNTf <sub>2</sub> | 0.10 M                         | 12                    |
| 5     |                                     | 0.10 M                         | 42                    |
| 6     |                                     | 0.10 M                         | 59                    |
| 7     |                                     | 0.10 M                         | 76                    |
| 8     |                                     | 0.30 M                         | 89                    |

<sup>a</sup> Isolable yield.

**Supplementary Table S2.** Catalyst screen of benzannulation reaction between siloxy alkyne and Isoquinoline *N*-oxide.

**General procedures for organic synthesis.** Hexanes (ACS grade) and ethyl acetate (ACS grade) were purchased from Fisher Scientific and used without further purification. Dichloromethane was distilled over calcium hydride under a positive pressure of nitrogen. Unless otherwise noted, all reactions were performed under an inert atmosphere of nitrogen in flame-dried vials equipped with a stirbar and a cap with PTFE insert. Other commercially available reagents were obtained from Sigma-Aldrich, Strem or Alfa Aesar and were used without further purification unless otherwise noted. For siloxy alkyne synthesis, triisopropylsilyl trifluoromethanesulfonate (TIPSOTf) was distilled under reduced pressure over calcium hydride and hexamethyldisilazane (HMDS) was distilled under positive pressure of nitrogen over calcium hydride. Solution-phase reactions were monitored by thin layer chromatography (TLC) using Whatman precoated silica gel plates. Column chromatography was performed by CombiFlash<sup>®</sup> using Silicycle silica gel column (12g, 230-400 mesh). NMR data are reported as follows: chemical shift, integration, multiplicity (s = singlet, d = doublet, dd = doublet of doublet, t = triplet, tt = triplet of triplets, q = quartet, ddd = doublet of doublet of doublets, br = broad, m = multiplet) and coupling constants in Hertz (Hz). <sup>1</sup>H and <sup>13</sup>C NMR spectra were recorded on a Bruker DMX-500 instrument and chemical shifts are reported in ppm using residual solvent peaks as internal standards. High resolution mass spectra were recorded with a Waters Q-TOF Ultima tandem quadrupole/time-of-flight instrument. Siloxy alkynes were prepared according to the known procedure<sup>1</sup>. (E,E)-1,4-diphenyl-1-aza-buta-1,3-diene and (p-tolyl-meth-(E)-ylidene)pyridin-2-yl-amine) were synthesized by established methods<sup>2,3</sup>. 4-chloro-2H-pyran-2-one and 4-phenyl-2H-pyran-2-one were prepared according to the known methods<sup>4,5</sup>. Isoquinolines N-oxides were synthesized by known methods<sup>6,7,8</sup>.

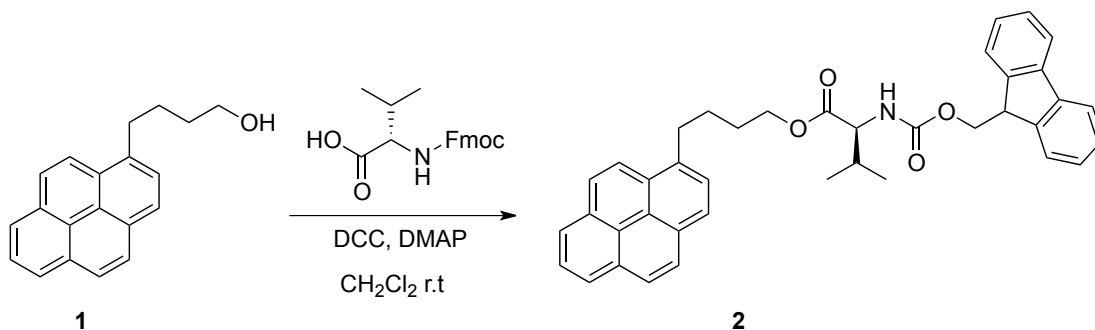

Under a nitrogen atmosphere, a solution of 1-pyrenebutanol **1** (50 mg, 0.182 mmol) and Fmoc-Val-OH (61.77 mg, 0.182 mmol) in dichloromethane (5 mL) was treated with N,N'-dicyclohexylcarbodiimide (37.55 mg, 0.182 mmol), N,N-dimethylpyridin-4-amine (2.22 mg, 0.0182 mmol) and stirred at room temperature. Immediately after adding N,N-dimethylpyridin-4-amine, 1  $\mu$ L of the crude reaction mixture was manually loaded onto a MALDI plate, dried at room temperature for 5 min and then analyzed by LDI-MS. Additional LDI-MS data of the reaction were taken over time. After 4 days product **2** was isolated as a white solid (93%, 101.7 mg) by silica gel flash chromatography. <sup>1</sup>H NMR (500 MHz, CDCl<sub>3</sub>)  $\delta$  8.22 (1H, d, J = 9.5 Hz), 8.14 (2H, d, J = 7.5 Hz), 8.08 (2H, d, J = 9.5 Hz), 8.00 (2H, s), 7.97 (1H, t, J = 7.5 Hz), 7.83 (1H, d, J = 7.5 Hz), 7.73 (2H, d, J = 7.0 Hz), 7.56 (2H, t, J = 7.0 Hz), 7.37 (2H, t, J = 5.5 Hz), 7.28 (2H, t, J = 8.0 Hz), 5.28 (1H, d, J = 9.5 Hz), 4.37 (2H, dd, J = 7.5, 4.0 Hz), 4.30 (1H, dd, J = 9.5, 5.0 Hz), 4.21-4.19 (3H, m), 3.36 (2H, t, J = 8.0 Hz), 2.15-2.11 (1H, m), 1.94-1.91 (2H, m), 1.83-1.80 (2H, m), 0.93 (3H, d, J = 6.5 Hz), 0.85 (3H, d, J = 7.0 Hz). <sup>13</sup>C NMR (125 MHz, CDCl<sub>3</sub>)  $\delta$  172.3, 156.4, 144.0, 143.9, 141.4, 136.2, 131.5, 131.0, 130.0, 128.7, 127.8, 127.6, 127.5, 127.3, 127.2, 126.8, 126.0, 125.2, 125.18, 125.11, 124.99, 124.93, 123.3, 120.1, 67.2, 65.3, 59.2, 47.3, 33.1, 31.5, 28.7, 28.2, 19.1, 17.7. HRMS-ES<sup>+</sup> calc'd for C<sub>40</sub>H<sub>38</sub>NO<sub>4</sub> [M+H]<sup>+</sup> 596.2801, found [M+H]<sup>+</sup> 596.2806.



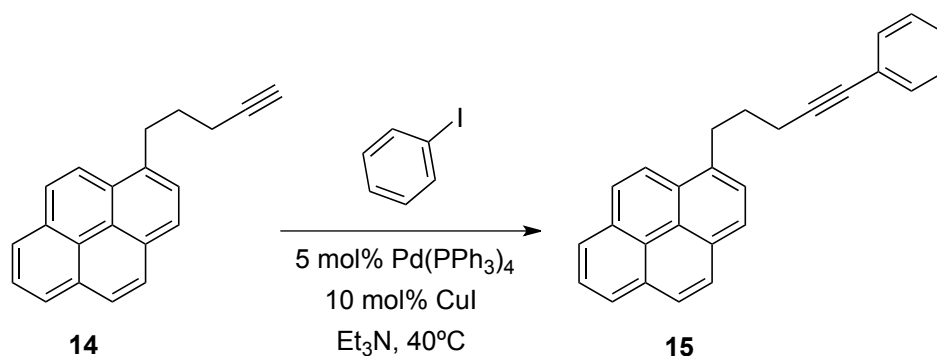

A solution of  $\text{Pd(PPh}_3)_4$  (17.3 mg, 0.015 mmol),  $\text{CuI}$  (5.7 mg, 0.03 mmol) and iodobenzene (44.6  $\mu\text{L}$ , 0.4 mmol) in triethylamine (10 mL) was treated dropwise with a solution of **14** (80 mg, 0.3 mmol) in triethylamine (5 mL) over 10 min. Immediately after complete addition of alkyne **14**, 1  $\mu\text{L}$  of the crude reaction mixture was manually loaded onto a MALDI plate, dried at room temperature for 5 min and then analyzed by LDI-MS. The reaction was then warmed up to 40  $^\circ\text{C}$  and stirred under nitrogen atmosphere. Additional LDI-MS data of the reaction were taken over time. After 24 hours, the crude reaction was diluted with dichloromethane (50 mL) followed by an aqueous work up. Purification by silica gel flash chromatography afforded **15** as a white solid (80%, 82.2 mg).  $^1\text{H NMR}$  (500 MHz,  $\text{CDCl}_3$ )  $\delta$  8.35 (1H, d,  $J = 10$  Hz), 8.15 (2H, dd,  $J = 7.5, 2.5$  Hz), 8.10 (2H, t,  $J = 10$  Hz), 8.01 (2H, d,  $J = 2.5$  Hz), 7.97 (1H, t,  $J = 7.5$  Hz), 7.91 (1H, d,  $J = 7.5$  Hz), 7.46 (2H, dd,  $J = 7.5, 2.0$  Hz), 7.332-7.289 (3H, m), 3.53 (2H, t,  $J = 8.0$  Hz), 2.53 (2H, t,  $J = 7.0$  Hz), 2.16 (2H, tt,  $J = 8.0, 7.0$  Hz).  $^{13}\text{C NMR}$  (125 MHz,  $\text{CDCl}_3$ )  $\delta$  136.1, 131.7, 131.6, 131.1, 130.1, 128.9, 128.4, 127.8, 127.7, 127.6, 127.5, 126.8, 126.0, 125.3, 125.2, 125.08, 125.01, 124.9, 124.1, 123.58, 90.0, 81.6, 32.6, 30.8, 19.4. HRMS- $\text{EI}^+$  calc'd for  $\text{C}_{27}\text{H}_{20}$   $[\text{M}]^+$  344.15650, found  $[\text{M}]^+$  344.15745.

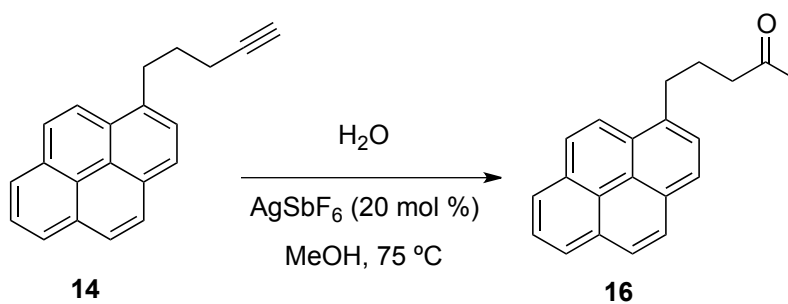

A solution of **14** (20 mg, 0.074 mmol) in 1.5 mL of a mixture of  $\text{MeOH}/\text{H}_2\text{O}$  (10/1) was prepared. The resulting mixture was treated with  $\text{AgSbF}_6$  (5.08 mg, 0.015 mmol). Immediately after adding  $\text{AgSbF}_6$ , 1  $\mu\text{L}$  of the crude reaction mixture was manually loaded onto a MALDI plate, dried at room temperature for 5 min and then analyzed by LDI-MS. The reaction was then warmed up to 75  $^\circ\text{C}$  and stirred under a nitrogen atmosphere. Additional LDI-MS data of the reaction were taken over time. After 2 days, the solvent was evaporated and product **16** was isolated as a white solid (45%, 9.4 mg) by silica gel flash chromatography.  $^1\text{H NMR}$  (500 MHz,  $\text{CDCl}_3$ )  $\delta$  8.29 (1H, d,  $J = 9.0$  Hz), 8.15 (1H, d,  $J = 5.5$  Hz), 8.13 (1H, d,  $J = 4.5$  Hz), 8.10 (1H, d,  $J = 3.5$  Hz), 8.08 (1H, d,  $J = 2.5$  Hz), 8.01 (2H, d,  $J = 1.0$  Hz), 7.97 (1H, t,  $J = 7.5$  Hz), 7.82 (1H, d,  $J = 7.5$  Hz), 3.34 (2H, t,  $J = 7.5$  Hz), 2.53 (2H, t,  $J = 7.0$  Hz), 2.14-2.11 (5H, m).  $^{13}\text{C NMR}$  (125 MHz,  $\text{CDCl}_3$ )  $\delta$  208.9, 136.1, 131.6, 131.1, 130.1, 129.0, 127.6, 127.59, 127.52, 126.9, 126.0, 125.2, 125.19, 125.11, 124.99, 124.97, 123.5, 43.1, 32.7, 30.2, 25.7. HRMS- $\text{EI}^+$  calc'd for  $\text{C}_{21}\text{H}_{18}\text{O}$   $[\text{M}]^+$  286.13577, found  $[\text{M}]^+$  286.13519.

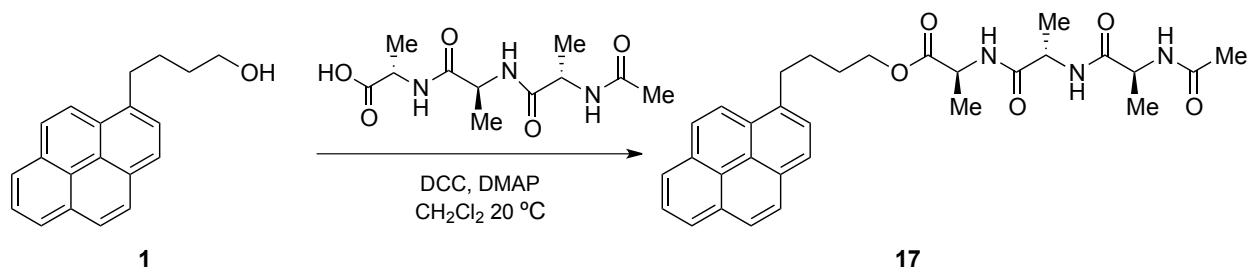

Under a nitrogen atmosphere, a solution of 1-pyrenebutanol **1** (10 mg, 0.036 mmol) and N-acetyl-Ala-Ala (9.8 mg, 0.036 mmol) in dichloromethane (2 mL) was treated with N,N'-dicyclohexylcarbodiimide (7.43mg, 0.036 mmol), N,N-dimethylpyridin-4-amine (0.44 mg, 0.0036 mmol) and stirred at room temperature. Immediately after adding N,N-dimethylpyridin-4-amine, 1  $\mu\text{L}$  of the crude reaction mixture was manually loaded onto a MALDI plate, dried at room temperature for 5 min and then analyzed by LDI-MS. Additional LDI-MS data of the reaction were taken over time. After 6 days, product **17** was isolated as a white solid (69%, 13.1 mg) by silica gel flash chromatography.  $^1\text{H}$  NMR (500 MHz,  $\text{CDCl}_3$ )  $\delta$  8.20 (1H, d,  $J = 9.0$  Hz), 8.12 (2H, dd,  $J = 7.5, 3.5$  Hz), 8.08 (1H, s), 8.06 (1H, t,  $J = 2.5$  Hz), 7.99 (2H, s), 7.96 (1H, t,  $J = 7.5$  Hz), 7.80 (1H, d,  $J = 8.0$  Hz), 7.17 and 7.16 (1H, d,  $J = 7.0$  Hz), 7.10 and 7.04 (1H, d,  $J = 7.0$  Hz), 6.70 and 6.55 (1H, d,  $J = 7.0$  Hz), 4.63-4.48 (3H, m), 4.20-4.13 (2H, m), 3.33 (2H, t,  $J = 7.5$  Hz), 1.97 and 1.95 (3H, s), 1.92-1.85 (2H, m), 1.82-1.74 (2H, m), 1.36-1.31 (9H, m).  $^{13}\text{C}$  NMR (125 MHz,  $\text{CDCl}_3$ )  $\delta$  (173.0, 172.9), (172.45, 172.43), (171.8, 171.7), (170.3, 170.1), 136.2, 131.6, 131.0, 130.0, 128.7, 127.6, 127.5, 127.4, 126.8, 126.0, 125.2, 125.18, 125.14, 125.0, 124.95, 123.3, (65.54, 65.51), (49.2, 49.02), (49.00, 48.93), (48.39, 48.36), 33.1, 28.7, 28.1, 23.2, (19.3, 19.1), (19.0, 18.7), (18.4, 18.3). HRMS-ES $^+$  calc'd for  $\text{C}_{31}\text{H}_{36}\text{N}_3\text{O}_5$   $[\text{M}+\text{H}]^+$  530.2655, found  $[\text{M}+\text{H}]^+$  530.2664.

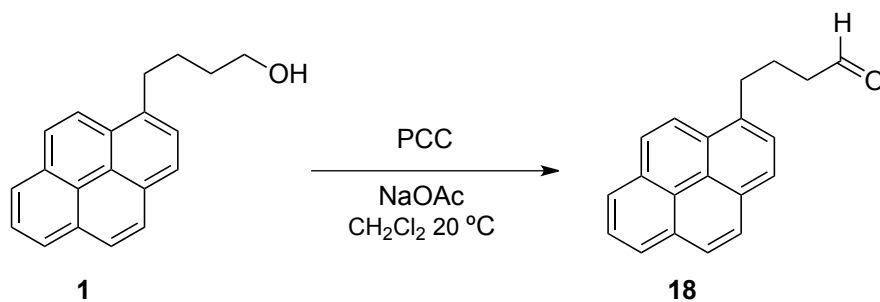

Under a nitrogen atmosphere, a solution of 1-pyrenebutanol **1** (20 mg, 0.072 mmol) and pyridinium chlorochromate (31.04 mg, 0.144 mmol) in dichloromethane (1.0 mL) was treated with sodium acetate (11.8 mg, 0.144 mmol) and stirred at room temperature. Immediately after adding sodium acetate, 1  $\mu\text{L}$  of the crude reaction mixture was manually loaded onto a MALDI plate, dried at room temperature for 5 min and then analyzed by LDI-MS. Additional LDI-MS data of the reaction were taken over time. After 6 hours product **18** was isolated as a yellowish solid (70%, 13.7 mg) by silica gel flash chromatography.  $^1\text{H}$  NMR (500 MHz,  $\text{CDCl}_3$ )  $\delta$  9.73 (1H, s), 8.23 (1H, d,  $J = 10$  Hz), 8.16 (2H, dd,  $J = 7.5, 2.5$  Hz), 8.08 (2H, dd,  $J = 9.0, 6.5$  Hz), 8.01 (2H, s), 7.98 (1H, t,  $J = 7.5$  Hz), 7.78 (1H, d,  $J = 8.0$  Hz), 3.29 (2H, t,  $J = 7.5$ ), 2.47 (2H, td,  $J = 7.0, 1.5$  Hz), 2.12 (2H, tt,  $J = 7.5$  Hz).  $^{13}\text{C}$  NMR (125 MHz,  $\text{CDCl}_3$ )  $\delta$  202.2, 135.5, 131.4, 130.9, 130.0, 128.7, 127.56, 127.53, 127.3, 126.8, 125.9, 125.1, 125.07, 125.04, 124.9, 124.8, 123.2, 43.4, 32.6, 23.9. HRMS-EI $^+$  calc'd for  $\text{C}_{20}\text{H}_{16}\text{O}$   $[\text{M}]^+$  272.12012, found  $[\text{M}]^+$  272.12080.

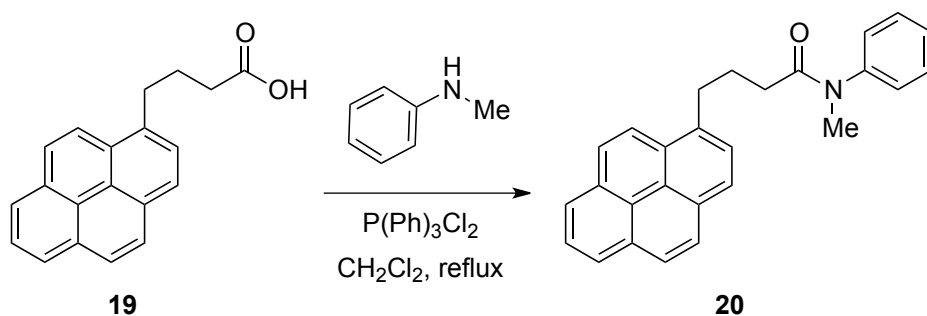

A solution of 1-pyrenebutyric acid **19** (100 mg, 0.347 mmol) and N-methylaniline (45.1  $\mu\text{L}$ , 0.416 mmol) in dichloromethane (10 mL) was treated with dichlorotriphenylphosphorane (277.6 mg, 0.833 mmol) and stirred under a nitrogen atmosphere. Immediately after adding dichlorotriphenylphosphorane, 1  $\mu\text{L}$  of the crude reaction mixture was manually loaded onto a MALDI plate, dried at room temperature for 5 min and then analyzed by LDI-MS. The reaction was then warmed up to reflux. Additional LDI-MS data of the reaction were taken over time. After 5 days, product **20** was isolated as a white solid (55%, 71.4 mg) by silica gel flash chromatography.  $^1\text{H}$  NMR (500 MHz,  $\text{CDCl}_3$ )  $\delta$  8.22 (1H, d,  $J = 10$  Hz), 8.13 (2H, dd,  $J = 7.5, 3.0$  Hz), 8.05 (1H, d,  $J = 10$  Hz), 8.01 (1H, d,  $J = 10$  Hz), 7.98 (2H, s), 7.96 (1H, t,  $J = 10$  Hz), 7.72 (1H, d,  $J = 7.5$  Hz), 7.19 (2H, t, 7.0 Hz), 7.13 (1H, d,  $J = 7.5$  Hz), 7.02 (2H, d,  $J = 6.0$  Hz), 3.27-3.24 (5H, m), 2.19 (2H, t,  $J = 6.5$  Hz), 2.11 (2H, tt,  $J = 7.0$  Hz).  $^{13}\text{C}$  NMR (125 MHz,  $\text{CDCl}_3$ )  $\delta$  172.9, 144.1, 136.3, 131.5, 131.0, 129.9, 129.7, 128.8, 127.7, 127.6, 127.39, 127.37, 127.34, 126.7, 125.9, 125.19, 125.15, 124.9, 124.86, 124.84, 123.7, 37.4, 33.9, 33.0, 27.5. HRMS-ES<sup>+</sup> calc'd for  $\text{C}_{27}\text{H}_{24}\text{NO}$   $[\text{M}+\text{H}]^+$  378.1858, found  $[\text{M}+\text{H}]^+$  378.1863.

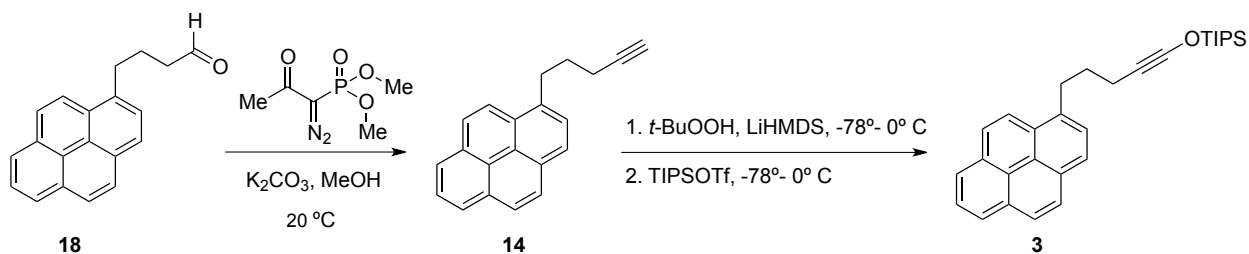

**Alkyne 14.** A solution of **18** (365 mg, 1.342 mmol) and  $\text{K}_2\text{CO}_3$  (371 mg, 2.68 mmol) in MeOH (36 mL, anhydrous) was treated with dimethyl (1-diazo-2-oxopropyl)phosphonate (242  $\mu\text{L}$ , 1.61 mmol) and stirred under nitrogen atmosphere at room temperature. After complete consumption of starting material as indicated by TLC, the crude reaction was diluted with ether (50 mL) and washed with saturated aqueous solution of  $\text{NaHCO}_3$  (2 times, 50 mL). The organic layer was washed with brine and dried over  $\text{MgSO}_4$ . After evaporation of the solvent and isolation by silica gel flash chromatography product **14** was afforded as a white solid (77%, 278.6 mg).  $^1\text{H}$  NMR (500 MHz,  $\text{CDCl}_3$ )  $\delta$  8.29 (1H, d,  $J = 10$  Hz), 8.15 (2H, dd,  $J = 7.5, 3$  Hz), 8.10 (1H, s), 8.09 (1H, d,  $J = 2$  Hz), 8.01 (2H, d,  $J = 2$  Hz), 7.97 (1H, t,  $J = 7.5$  Hz), 7.88 (1H, d,  $J = 7.5$  Hz), 3.46 (2H, t,  $J = 7.0$  Hz), 2.31 (2H, td,  $J = 7.0, 2.5$  Hz), 2.07 (2H, tt,  $J = 7.0$  Hz), 2.07 (1H, t, 2.5 Hz).  $^{13}\text{C}$  NMR (125 MHz,  $\text{CDCl}_3$ )  $\delta$  135.8, 131.5, 131.0, 130.0, 128.8, 127.6, 127.49, 127.45, 126.8, 125.9, 125.2, 125.1, 125.0, 124.9, 124.8, 123.4, 84.4, 69.1, 32.3, 30.4, 18.4. HRMS-EI<sup>+</sup> calculated for  $\text{C}_{21}\text{H}_{16}$   $[\text{M}]^+$  268.12520, found  $[\text{M}]^+$  268.12616.

**Siloxy alkyne 3.** A 100 mL three-necked flame dried round bottomed flask, fitted with rubber septa and a nitrogen line, was charged with tetrahydrofuran (15 mL) and **14** (996.7 mg, 3.72 mmol). The resulting solution was cooled down to -78 °C and treated with *t*-BuOOH (708  $\mu$ L, 5.78 M solution in nonane, 4.092 mmol) (CAUTION! OXIDANTS AND OXIDABLES MAY VIOLENTLY REACT). Freshly prepared LiHMDS (9.672 mL, 1M, 9.672 mmol) was added to the reaction via a syringe pump over 30 min. The reaction mixture was warmed up to 0 °C in an ice water bath and stirred for 2.25 hours. Then, the reaction mixture was cooled down to -78 °C and TIPSOTf (1.1 mL, 4.092 mmol) was added dropwisely over 10 min and stirred at -78 °C for 5 min. Finally, the reaction mixture was warmed up again to 0 °C and allowed to stir for 40 min. The crude mixture was diluted with hexanes (25 mL), transferred to a separatory funnel and washed with a saturated solution of NaHCO<sub>3</sub> (2 x 100 mL). The organic layer was then collected and washed with a saturated solution of Na<sub>2</sub>S<sub>2</sub>O<sub>3</sub> (100 mL) followed by brine (100 mL). The organic layer was dried over MgSO<sub>4</sub>, filtered and the solvent was removed by rotary evaporation. By products were removed by Kugelrohr distillation (60 °C, 1 hour) and siloxy alkyne **3** was obtained after purification over basic alumina flash chromatography giving a yellowish oil (54%, 877.5 mg). <sup>1</sup>H NMR (500 MHz, CDCl<sub>3</sub>)  $\delta$  8.32 (1H, d, J = 10 Hz), 8.15 (2H, t, J = 5 Hz), 8.09 (2H, t, J = 10 Hz), 8.01 (2H, d, J = 5 Hz), 7.98 (1H, t, J = 5 Hz), 7.88 (1H, d, J = 5 Hz), 3.44 (2H, t, J = 10 Hz), 2.25 (2H, t, J = 10 Hz), 1.99 (2H, tt, J = 10 Hz), 1.31 (3H, m, J = 5 Hz), 1.17 (18H, d, J = 5 Hz). <sup>13</sup>C NMR (125 MHz, CDCl<sub>3</sub>)  $\delta$  136.7, 131.5, 131.0, 129.9, 128.8, 127.6, 127.4, 127.2, 126.6, 125.8, 125.2, 125.1, 124.91, 124.90, 124.7, 123.6, 87.6, 32.7, 32.1, 30.3, 17.6, 17.5, 12.0. HRMS-EI<sup>+</sup> calc'd for C<sub>30</sub>H<sub>36</sub>OSi [M]<sup>+</sup> 440.25355, found [M]<sup>+</sup> 440.25276.

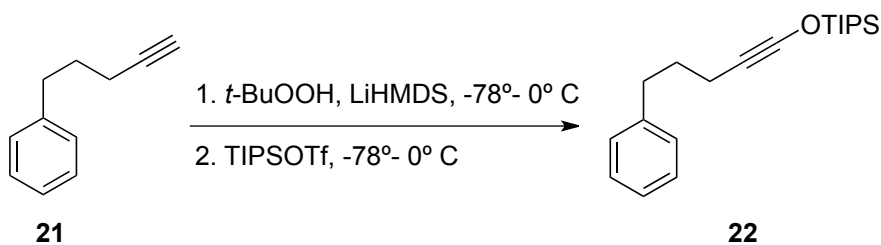

**Siloxy alkyne 22.** A 500 ml three-necked flamed dried round bottomed flask, fitted with a rubber septa and a nitrogen line was filled with tetrahydrofuran (100 mL) and **21** (5.26 mL, 34.66 mmol). The resulting solution was then cooled down to -78 °C and treated with *t*-BuOOH (6.6 mL, 5.78 M solution in nonane, 38.13 mmol) (CAUTION! OXIDANTS AND OXIDABLES MAY VIOLENTLY REACT). Freshly prepared LiHMDS (90.12 mL, 1M, 90.12 mmol) was added to the reaction via a syringe pump over 30 min. The reaction mixture was warmed up to 0 °C in an ice water bath and stirred for 2.25 hours. Then, the reaction mixture was cooled down to -78 °C and TIPSOTf (10.25 mL, 38.13 mmol) was added dropwisely over 10 min and stirred at -78 °C for 5 min. Finally, the reaction mixture was warmed up again to 0 °C and allowed to stir for 40 min. The crude mixture was then diluted with hexanes (150 mL), transferred to a separatory funnel and washed with a saturated solution of NaHCO<sub>3</sub> (2 x 150 mL). The organic layer was then collected and washed with a saturated solution of Na<sub>2</sub>S<sub>2</sub>O<sub>3</sub> (150 mL) followed by brine (150 mL). The organic layer was dried over MgSO<sub>4</sub>, filtered and the solvent was removed by rotary evaporation. The siloxy alkyne **22** was purified by Kugelrohr distillation as a clear oil (85%, 9.29 gr). <sup>1</sup>H NMR (500 MHz, CDCl<sub>3</sub>)  $\delta$  7.31-7.28 (2H, m), 7.22-7.20 (3H, m), 2.73 (2H, t, J = 5.0 Hz), 2.14 (2H, t, J = 5 Hz), 1.77 (2H, tt, J = 5 Hz), 1.33-1.28 (3H, m), 1.17 (18H, d, J = 10 Hz). <sup>13</sup>C NMR (125 MHz, CDCl<sub>3</sub>)  $\delta$  142.4, 128.6, 128.4, 125.8, 87.3, 35.1, 31.9, 30.2, 17.5, 17.0, 12.0. HRMS-ES<sup>+</sup> calc'd for C<sub>20</sub>H<sub>33</sub>OSi [M+H]<sup>+</sup> 317.2301, found [M+H]<sup>+</sup> 317.2302

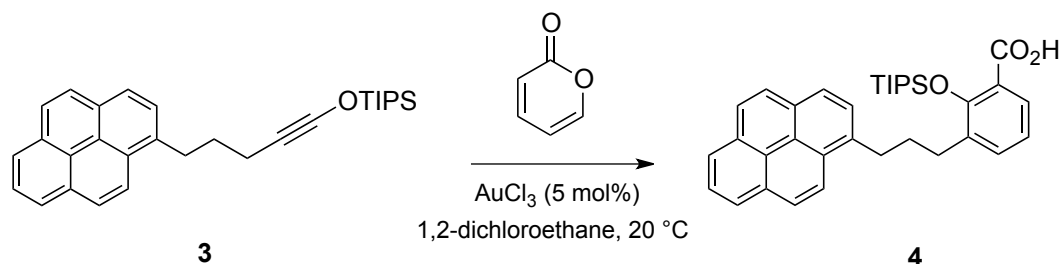

**Carboxylic Acid 4.** A solution of 2-pyrone (12.04  $\mu\text{L}$ , 0.15 mmol) and catalyst  $\text{AuCl}_3$  (2.27 mg, 0.0075 mmol) in 1,2-dichloroethane (0.2 mL) was prepared in a dram vial. The resulting mixture was treated with a solution of siloxyalkyne **3** (99 mg, 0.225 mmol) in 1,2-dichloroethane (0.3 mL). The mixture was stirred at room temperature for 12 hours. The solvent was removed under reduced pressure and the carboxylic acid **4** was purified by column chromatography.  $^1\text{H NMR}$  (500 MHz,  $\text{CDCl}_3$ )  $\delta$  11.3 (1H, s), 8.13 (1H, d,  $J = 9.5$  Hz), 8.03 (2H, dd,  $J = 7.5, 1.5$  Hz), 7.99 (1H, d,  $J = 8.0$  Hz), 7.96 (1H, D,  $J = 9.5$  Hz), 7.92 – 7.85 (3H, m), 7.79 (1H, d,  $J = 8.0$  Hz), 7.66 (1H, dd,  $J = 8.0, 2.0$  Hz), 7.24 (1H, dd,  $J = 7.0, 1.0$  Hz), 6.71 (1H, t,  $J = 7.5$  Hz), 3.31 (2H, t,  $J = 8.0$  Hz), 2.79 (2H, t,  $J = 7.5$  Hz), 2.11 (2H, quintet,  $J = 8.0$  Hz), 1.33 (3H, septet,  $J = 7.5$  Hz), 1.05 (18H, d,  $J = 7.5$  Hz).  $^{13}\text{C NMR}$  (125 MHz,  $\text{CDCl}_3$ )  $\delta$  169.8, 159.6, 135.8, 134.7, 130.4, 129.9, 129.4, 128.7, 127.6, 127.6, 126.5, 126.1, 126.0, 125.4, 124.6, 124.0, 124.0, 123.7, 123.7, 123.5, 122.4, 117.3, 112.1, 32.3, 30.4, 28.8, 16.7, 11.0. HRMS-EI calc'd for  $\text{C}_{35}\text{H}_{40}\text{O}_3\text{Si}$  [ $\text{M}^+$ ] 536.27468, found [ $\text{M}^+$ ] 536.27408.

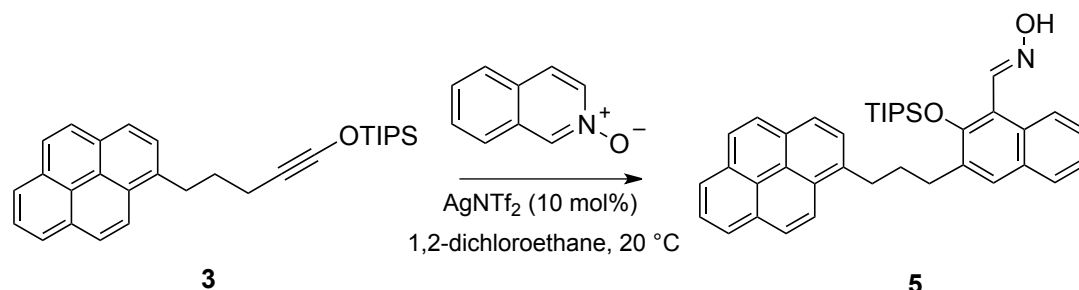

**Oxime 5.** A solution of isoquinoline *N*-oxide (21.7 mg, 0.15 mmol) and catalyst  $\text{AgNTf}_2$  (5.82 mg, 0.015 mmol) in 1,2-dichloroethane (0.2 mL) was prepared in a dram vial. The resulting mixture was treated with a solution of siloxyalkyne **3** (99 mg, 0.225 mmol) in 1,2-dichloroethane (0.3 mL). The mixture was stirred at room temperature for 12 hours. The solvent was removed under reduced pressure and the oxime **5** was purified by column chromatography.  $^1\text{H NMR}$  (500 MHz,  $\text{CDCl}_3$ )  $\delta$  11.5 (1H, s), 9.32 (1H, s), 8.31 (1H, d,  $J = 9.0$  Hz), 8.19 (2H, d,  $J = 7.5$  Hz), 8.16 (1H, d,  $J = 7.5$  Hz), 8.11 (1H, d,  $J = 9.0$  Hz), 8.06 (2H, d,  $J = 5.5$  Hz), 8.03 (2H, dd,  $J = 10.0, 2.0$  Hz), 7.79 (1H, d,  $J = 7.5$  Hz), 7.73 (1H, d,  $J = 7.5$  Hz), 7.68 (1H, s), 7.50 (1H, dt,  $J = 6.5, 1.0$  Hz), 7.36 (1H, dt,  $J = 7.0, 0.5$  Hz), 3.51 (2H, t,  $J = 7.5$  Hz), 3.09 (2H, t,  $J = 7.5$  Hz), 2.38 (2H, quintet,  $J = 8.0$  Hz), 1.41 (3H, m), 1.22 (18H, d,  $J = 7.5$  Hz).  $^{13}\text{C NMR}$  (125 MHz,  $\text{CDCl}_3$ )  $\delta$  157.0, 153.4, 136.9, 131.4, 131.2, 130.9, 130.9, 129.8, 128.7, 128.4, 128.2, 127.5, 127.2, 127.1, 126.5, 126.5, 125.8, 125.1, 125.0, 124.8, 124.8, 124.6, 123.5, 123.4, 120.0, 106.8, 100.0, 33.4, 31.2, 30.6, 17.9, 11.9. HRMS-EI calc'd for  $\text{C}_{39}\text{H}_{43}\text{NO}_2$  [ $\text{M}^+$ ] 585.30631, found [ $\text{M}^+ + 2\text{H}$ ] 587.31884.

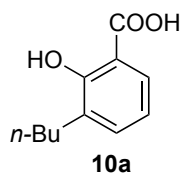

Carboxylic Acid **10a** was prepared in 89% yield according to a general procedure for benzannulation of siloxy alkynes and 2-pyrones.  $^1\text{H}$  NMR (500 MHz,  $\text{CDCl}_3$ )  $\delta$  10.6 (1H, s), 7.72 (1H, dd,  $J = 8.0, 1.5$  Hz), 7.30 (1H, dd,  $J = 7.5, 1.0$  Hz), 6.8 (1H, t,  $J = 7.5$  Hz), 2.60 (2H, t,  $J = 7.5$  Hz), 1.53 (2H, quintet,  $J = 7.5$  Hz), 1.32 (2H, sextet,  $J = 7.5$  Hz), 0.87 (3H, t,  $J = 7.0$  Hz).  $^{13}\text{C}$  NMR (125 MHz,  $\text{CDCl}_3$ )  $\delta$  175.3, 160.4, 137.0, 131.5, 128.4, 118.9, 110.6, 31.6, 29.3, 22.5, 14.0. HRMS-EI calc'd for  $\text{C}_{11}\text{H}_{14}\text{O}_3$  [ $\text{M}^+$ ] 194.0943, found [ $\text{M}^+$ ] 194.09349.

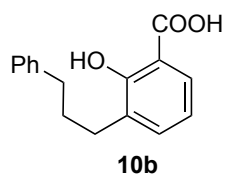

Carboxylic Acid **10b** was prepared in 80% yield according to a general procedure for benzannulation of siloxy alkynes and 2-pyrones.  $^1\text{H}$  NMR (500 MHz,  $\text{CDCl}_3$ )  $\delta$  10.6 (1H, br s), 7.72 (1H, dd,  $J = 8.0, 1.5$  Hz), 7.30 (1H, d,  $J = 7.0$  Hz), 7.21 (2H, t,  $J = 7.5$  Hz), 7.12 (3H, m), 6.78 (1H, t,  $J = 7.5$  Hz), 2.65 (2H, t,  $J = 7.5$  Hz), 2.62 (2H, t,  $J = 8.0$  Hz), 1.90 (2H, quintet,  $J = 8.0$  Hz).  $^{13}\text{C}$  NMR (125 MHz,  $\text{CDCl}_3$ )  $\delta$  175.2, 160.5, 142.3, 137.0, 130.9, 128.6, 128.4, 128.3, 125.7, 118.9, 110.8, 35.7, 30.9, 29.4. HRMS-EI calc'd for  $\text{C}_{16}\text{H}_{16}\text{O}_3$  [ $\text{M}^+$ ] 256.10995, found [ $\text{M}^+$ ] 256.10921.

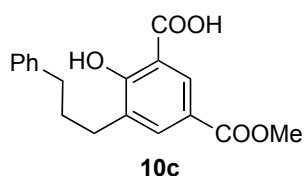

Carboxylic Acid **10c** was prepared in 65% yield according to a general procedure for benzannulation of siloxy alkynes and 2-pyrones.  $^1\text{H}$  NMR (500 MHz,  $\text{CDCl}_3$ )  $\delta$  11.7 (1H, s), 8.42 (1H, d,  $J = 2.0$  Hz), 7.91 (1H, d,  $J = 2.0$  Hz), 7.21 (2H, m), 7.10 (3H, m), 3.82 (3H, s), 2.67 – 2.60 (4H, m), 1.90 (2H, quintet,  $J = 8.0$  Hz).  $^{13}\text{C}$  NMR (125 MHz,  $\text{CDCl}_3$ )  $\delta$  173.0, 166.5, 164.0, 142.1, 136.3, 130.9, 130.9, 128.4, 128.3, 125.7, 120.4, 111.7, 52.0, 35.7, 30.8, 29.3. HRMS-ESI calc'd for  $\text{C}_{18}\text{H}_{18}\text{O}_5$  [ $\text{M}^+$ ] 314.1154, found [ $\text{M}+\text{H}^+$ ] 315.1229.

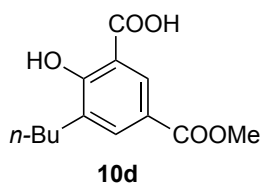

Carboxylic Acid **10d** was prepared in 70% yield according to a general procedure for benzannulation of siloxy alkynes and 2-pyrones.  $^1\text{H}$  NMR (500 MHz,  $\text{CDCl}_3$ )  $\delta$  12.0 (1H, s), 8.39 (1H, d,  $J = 2.0$  Hz), 7.89 (1H, d,  $J = 1.0$  Hz), 3.81 (3H, s), 2.60 (2H, t,  $J = 7.5$  Hz), 1.54 (2H, quintet,  $J = 8.0$  Hz), 1.32 (2H, sextet,  $J = 7.5$  Hz), 0.87 (3H, t,  $J = 7.5$  Hz).  $^{13}\text{C}$  NMR (125 MHz,  $\text{CDCl}_3$ )  $\delta$  172.7, 166.4, 163.9, 135.9, 131.2, 130.6, 120.1, 112.0, 51.8, 31.3, 29.1, 22.4, 13.9. HRMS-ESI calc'd for  $\text{C}_{13}\text{H}_{16}\text{O}_5$  [ $\text{M}^+$ ] 252.0998, found [ $\text{M}+\text{H}^+$ ] 253.1083.

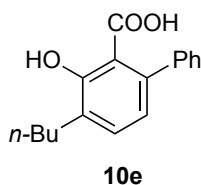

Carboxylic Acid **10e** was prepared in 83% yield according to a general procedure for benzannulation of siloxy alkynes and 2-pyrones.  $^1\text{H}$  NMR (500 MHz,  $\text{CDCl}_3$ )  $\delta$  11.3 (1H, brs), 7.28 - 7.18 (6H, m), 6.62 (1H, d,  $J = 7.5$  Hz), 2.61 (2H, t,  $J = 8.0$  Hz), 1.56 (2H, quintet,  $J = 7.5$  Hz), 1.34 (2H, sextet,  $J = 7.5$  Hz), 0.88 (3H, t,  $J = 7.0$  Hz).  $^{13}\text{C}$  NMR (125 MHz,  $\text{CDCl}_3$ )  $\delta$  174.2, 160.4, 142.8, 142.7, 134.1, 130.4, 128.5, 127.7, 126.8, 122.0, 110.4, 31.5, 29.6, 22.6, 14.0. HRMS-ESI calc'd for  $\text{C}_{17}\text{H}_{18}\text{O}_3$  [ $\text{M}^+$ ] 270.1256, found [ $\text{M}+\text{H}^+$ ] 271.1342.

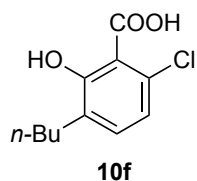

Carboxylic Acid **10f** was prepared in 98% yield according to a general procedure for benzannulation of siloxy alkynes and 2-pyrones.  $^1\text{H}$  NMR (500 MHz,  $\text{CDCl}_3$ )  $\delta$  11.3 (1H, brs), 7.15 (1H, d,  $J = 8.0$  Hz), 6.87 (1H, d,  $J = 8.0$  Hz), 2.56 (2H, t,  $J = 7.5$  Hz), 1.50 (2H, quintet,  $J = 8.0$  Hz), 1.30 (2H, sextet,  $J = 7.5$  Hz), 0.87 (3H, t,  $J = 7.0$  Hz).  $^{13}\text{C}$  NMR (125 MHz,  $\text{CDCl}_3$ )  $\delta$  173.5, 162.2, 135.4, 132.2, 130.9, 122.1, 109.6, 31.2, 29.4, 22.5, 13.9. HRMS-EI calc'd for  $\text{C}_{11}\text{H}_{13}\text{ClO}_3$  [ $\text{M}^+$ ] 228.05533, found [ $\text{M}^+$ ] 228.05598.

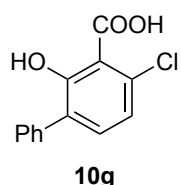

Carboxylic Acid **10g** was prepared in 53% yield according to a general procedure for benzannulation of siloxy alkynes and 2-pyrones.  $^1\text{H}$  NMR (500 MHz,  $\text{CDCl}_3$ )  $\delta$  12.2 (1H, brs), 7.46 (2H, d,  $J = 7.5$  Hz), 7.35 (2H, t,  $J = 7.5$  Hz), 7.27 (2H, m), 6.95 (1H, d,  $J = 8.5$  Hz).  $^{13}\text{C}$  NMR (125 MHz,  $\text{CDCl}_3$ )  $\delta$  172.2, 160.7, 136.9, 134.7, 134.4, 129.3, 129.1, 128.1, 127.4, 122.2, 112.4. HRMS-EI calc'd for  $\text{C}_{13}\text{H}_9\text{ClO}_3$  [ $\text{M}^+$ ] 248.02403, found [ $\text{M}^+$ ] 248.02470.

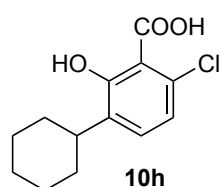

Carboxylic Acid **10h** was prepared in 94% yield according to a general procedure for benzannulation of siloxy alkynes and 2-pyrones.  $^1\text{H}$  NMR (500 MHz,  $\text{CDCl}_3$ )  $\delta$  11.9 (1H, brs), 7.09 (1H, d,  $J = 8.0$  Hz), 6.82 (1H, d,  $J = 8.5$  Hz), 2.87 (1H, t,  $J = 12.0$  Hz), 1.77 (4H, t,  $J = 13.0$  Hz), 1.67 (1H, d,  $J = 13.0$  Hz), 1.40 – 1.32 (2H, m), 1.28 – 1.15 (4H, m).  $^{13}\text{C}$  NMR (125 MHz,  $\text{CDCl}_3$ )  $\delta$  172.5, 161.1, 134.8, 132.1, 131.1, 121.8, 111.3, 36.5, 32.7, 26.9, 26.3. HRMS-EI calc'd for  $\text{C}_{13}\text{H}_{15}\text{ClO}_3$  [ $\text{M}^+$ ] 254.07098, found [ $\text{M}^+$ ] 254.07040.

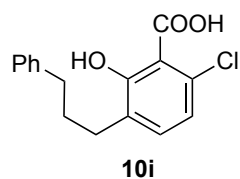

Carboxylic Acid **10i** was prepared in 93% yield according to a general procedure for benzannulation of siloxy alkynes and 2-pyrones.  $^1\text{H}$  NMR (500 MHz,  $\text{CDCl}_3$ )  $\delta$  11.2 (1H, s), 7.21 (2H, m), 7.13 (4H, m), 6.86 (1H, d,  $J = 8.0$  Hz), 2.60 (4H, t,  $J = 7.5$  Hz), 1.86 (2H, quintet,  $J = 7.5$  Hz).  $^{13}\text{C}$  NMR (125 MHz,  $\text{CDCl}_3$ )  $\delta$  173.8, 162.2, 142.1, 135.4, 132.6, 130.3, 128.4, 128.3, 125.8, 122.2, 109.8, 35.6, 30.6, 29.5. HRMS-EI calc'd for  $\text{C}_{16}\text{H}_{15}\text{ClO}_3$  [ $\text{M}^+$ ] 290.07098, found [ $\text{M}^+$ ] 290.07192.

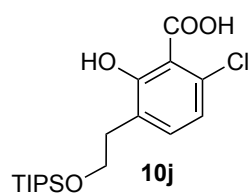

Carboxylic Acid **10j** was prepared in 93% yield according to a general procedure for benzannulation of siloxy alkynes and 2-pyrones.  $^1\text{H}$  NMR (500 MHz,  $\text{CDCl}_3$ )  $\delta$  11.0 (1H, brs), 7.18 (1H, d,  $J = 8.0$  Hz), 6.86 (1H, d,  $J = 8.0$  Hz), 3.86 (2H, t,  $J = 6.5$  Hz), 2.83 (2H, t,  $J = 6.0$  Hz), 1.00 (3H, m), 0.96 (9H, d,  $J = 6.5$  Hz).  $^{13}\text{C}$  NMR (125 MHz,  $\text{CDCl}_3$ )  $\delta$  172.8, 160.8, 136.1, 132.7, 127.0, 122.0, 111.9, 62.9, 33.9, 17.9, 11.9. HRMS-ESI calc'd for  $\text{C}_{18}\text{H}_{29}\text{ClO}_4\text{Si}$  [ $\text{M}^+$ ] 373.1602, found [ $\text{M}+\text{H}^+$ ] 373.1597.

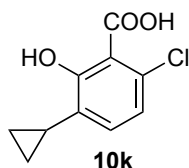

Carboxylic Acid **10k** was prepared in 97% yield according to a general procedure for benzannulation of siloxy alkynes and 2-pyrones.  $^1\text{H}$  NMR (500 MHz,  $\text{CDCl}_3$ )  $\delta$  11.8 (1H, brs), 6.78 (2H, m), 2.07 (1H, m), 0.87 (2H, m), 0.54 (2H, m).  $^{13}\text{C}$  NMR (125 MHz,  $\text{CDCl}_3$ )  $\delta$  172.4, 162.5, 131.9, 130.8, 129.7, 121.7, 111.2, 9.4, 7.3. HRMS-EI calc'd for  $\text{C}_{10}\text{H}_9\text{ClO}_3$  [ $\text{M}^+$ ] 212.02403, found [ $\text{M}^+$ ] 212.02462.

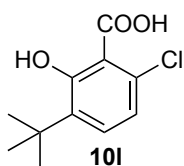

Carboxylic Acid **10l** was prepared in 67% yield according to a general procedure for benzannulation of siloxy alkynes and 2-pyrones.  $^1\text{H}$  NMR (500 MHz,  $\text{CDCl}_3$ )  $\delta$  11.7 (1H, s), 7.29 (1H, d,  $J = 8.5$  Hz), 6.87 (1H, d,  $J = 8.0$  Hz), 1.33 (9H, s).  $^{13}\text{C}$  NMR (125 MHz,  $\text{CDCl}_3$ )  $\delta$  174.0, 163.4, 137.5, 132.7, 132.6, 121.8, 109.9, 35.0, 29.1. HRMS-EI calc'd for  $\text{C}_{11}\text{H}_{13}\text{ClO}_3$  [ $\text{M}^+$ ] 228.05533, found [ $\text{M}^+$ ] 228.05626.

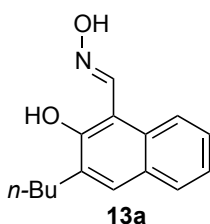

Oxime **13a** was prepared in 92% yield according to a general procedure for benzannulation of siloxy alkynes and isoquinoline *N*-oxides.  $^1\text{H}$  NMR (500 MHz,  $\text{CDCl}_3$ )  $\delta$  11.17 (1H, s), 9.16 (1H, s), 7.94 (1H, d,  $J = 8.5$  Hz), 7.74 (1H, d,  $J = 8.0$  Hz), 7.64 (1H, s), 7.49 – 7.44 (1H, m), 7.41 (1H, s), 7.37 – 7.33 (1H, m), 2.86 – 2.79 (2H, m), 1.76 – 1.67 (2H, m), 1.49 – 1.40 (2H, m), 0.98 (3H, t,  $J = 7.5$  Hz).  $^{13}\text{C}$  NMR (125 MHz,  $\text{CDCl}_3$ )  $\delta$  156.54, 150.22, 132.11, 131.36, 130.84, 128.35, 128.26, 126.53, 123.41, 119.87, 106.32, 31.55, 30.18, 22.65, 14.01. HRMS-ESI calc'd for  $\text{C}_{15}\text{H}_{18}\text{NO}_2$  [ $\text{M}+\text{H}$ ] 244.1338, found [ $\text{M}+\text{H}$ ] 244.1339.

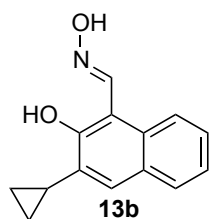

Oxime **13b** was prepared in 78% yield according to a general procedure for benzannulation of siloxy alkynes and isoquinoline *N*-oxides.  $^1\text{H}$  NMR (500 MHz,  $\text{CDCl}_3$ )  $\delta$  9.16 (1H, s), 7.92 (1H, d,  $J = 8.5$  Hz), 7.70 (1H, d,  $J = 8.0$  Hz), 7.52 – 7.44 (1H, m), 7.39 (1H, s), 7.38 – 7.32 (1H, m), 2.33 – 2.28 (1H, m), 1.06 – 1.00 (2H, m), 0.80 – 0.77 (2H, m).  $^{13}\text{C}$  NMR (125 MHz,  $\text{CDCl}_3$ )  $\delta$  157.17, 149.81, 132.70, 130.49, 128.41, 128.22, 127.73, 126.66, 123.58, 119.86, 106.11, 10.15, 7.25. HRMS-ESI calc'd for  $\text{C}_{14}\text{H}_{14}\text{NO}_2$  [ $\text{M}+\text{H}$ ] 228.1025, found [ $\text{M}+\text{H}$ ] 228.1029.

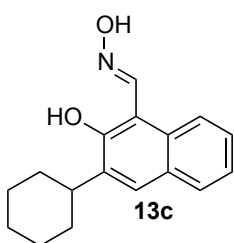

Oxime **13c** was prepared in 89% yield according to a general procedure for benzannulation of siloxy alkynes and isoquinoline *N*-oxides.  $^1\text{H}$  NMR (500 MHz,  $\text{CDCl}_3$ )  $\delta$  9.17 (1H, s), 7.93 (1H, d,  $J = 8.5$  Hz), 7.76 (1H, d,  $J = 8.5$  Hz), 7.67 (1H, s), 7.52 – 7.42 (1H, m), 7.38 – 7.31 (1H, m), 3.15 – 3.11 (1H, m), 2.03 – 2.01 (3H, m), 1.91 – 1.88 (2H, m), 1.82 – 1.80 (1H, m), 1.55 – 1.44 (3H, m), 1.33 – 1.26 (1H, m).  $^{13}\text{C}$  NMR (125 MHz,  $\text{CDCl}_3$ )  $\delta$  156.12, 150.29, 136.99, 130.54, 128.73, 128.61, 128.35, 126.59, 123.37, 119.77, 37.14, 33.09, 27.01, 26.44. HRMS-ESI calc'd for  $\text{C}_{17}\text{H}_{20}\text{NO}_2$  [ $\text{M}+\text{H}$ ] 270.1494, found [ $\text{M}+\text{H}$ ] 270.1484.



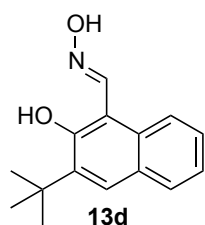

Oxime **13d** was prepared in 77% yield according to a general procedure for benzannulation of siloxy alkynes and isoquinoline *N*-oxides.  $^1\text{H}$  NMR (500 MHz,  $\text{CDCl}_3$ )  $\delta$  9.19 (1H, s), 7.91 (1H, d,  $J = 8.5$  Hz), 7.77 – 7.76 (2H, m), 7.48 – 7.47 (1H, m), 7.36 – 7.34 (1H, m), 1.53 (9H, s).  $^{13}\text{C}$  NMR (125 MHz,  $\text{CDCl}_3$ )  $\delta$  157.88, 150.60, 138.83, 130.94, 129.05, 128.97, 127.97, 126.81, 123.33, 119.49, 106.92, 35.36, 29.56. HRMS-ESI calc'd for  $\text{C}_{15}\text{H}_{18}\text{NO}_2$  [M+H] 244.1338, found [M+H] 244.1335.

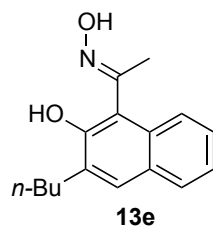

Oxime **13e** was prepared in 60% yield according to a general procedure for benzannulation of siloxy alkynes and isoquinoline *N*-oxides.  $^1\text{H}$  NMR (500 MHz,  $\text{CDCl}_3$ )  $\delta$  8.84 (1H, s), 7.73 (1H, d,  $J = 8.0$  Hz), 7.62 (1H, d,  $J = 8.5$  Hz), 7.59 (1H, s), 7.42 – 7.38 (1H, m), 7.31 (1H, dd,  $J = 11.0, 4.0$  Hz), 2.82 – 2.77 (2H, m), 2.44 (3H, s), 1.74 – 1.66 (2H, m), 1.48 – 1.41 (2H, m), 0.97 (3H, t,  $J = 7.5$  Hz).  $^{13}\text{C}$  NMR (125 MHz,  $\text{CDCl}_3$ )  $\delta$  158.91, 151.62, 131.81, 130.51, 129.95, 128.89, 128.07, 125.75, 123.91, 123.24, 114.25, 31.69, 30.64, 22.65, 17.47, 14.02. HRMS-ESI calc'd for  $\text{C}_{16}\text{H}_{20}\text{NO}_2$  [M+H] 258.1494, found [M+H] 258.1490.

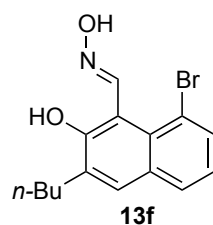

Oxime **13f** was prepared in 93% yield according to a general procedure for benzannulation of siloxy alkynes and isoquinoline *N*-oxides.  $^1\text{H}$  NMR (500 MHz,  $\text{CDCl}_3$ )  $\delta$  9.73 (1H, s), 7.75 (1H, d,  $J = 7.5$  Hz), 7.65 (1H, d,  $J = 7.5$  Hz), 7.56 (1H, s), 7.13 (1H, t,  $J = 7.5$  Hz), 2.83 – 2.74 (2H, m), 1.73 – 1.64 (2H, m), 1.42 (2H, m), 0.96 (3H, t,  $J = 7.5$  Hz).  $^{13}\text{C}$  NMR (125 MHz,  $\text{CDCl}_3$ )  $\delta$  157.51, 152.45, 133.36, 133.03, 131.79, 130.64, 128.36, 124.00, 116.54, 106.89, 31.31, 30.18, 22.62, 13.99. HRMS-ESI calc'd for  $\text{C}_{15}\text{H}_{17}\text{BrNO}_2$  [M+H] 322.0443, found [M+H] 322.0444.

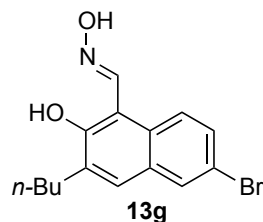

Oxime **13g** was prepared in 92% yield according to a general procedure for benzannulation of siloxy alkynes and isoquinoline *N*-oxides.  $^1\text{H}$  NMR (500 MHz,  $\text{CDCl}_3$ )  $\delta$  11.18 (1H, s), 9.06 (1H, s), 7.86 (1H, s), 7.76 (1H, d,  $J = 9.0$  Hz), 7.51 (s, 1H), 7.49 (2H, d,  $J = 10.5$  Hz), 2.84 – 2.77 (2H, m), 1.72 – 1.65 (2H, m), 1.48 – 1.42 (2H, m), 0.97 (3H, t,  $J = 7.5$  Hz).  $^{13}\text{C}$  NMR (125 MHz,  $\text{CDCl}_3$ )  $\delta$  156.68, 149.75, 133.53, 130.21, 130.20, 129.56, 129.50, 129.35, 121.70, 116.93, 106.48, 31.38, 30.14, 22.60, 13.97. HRMS-ESI calc'd for  $\text{C}_{15}\text{H}_{17}\text{BrNO}_2$  [M+H] 322.0443, found [M+H] 322.0440.

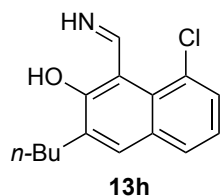

[M+H] 262.0995.

A crude mixture of oxime **13h** (0.5 mmol) and zinc powder (1.5 mmol) acetonitrile (10 mL, anhydrous) was treated with  $\text{MoCl}_5$  (70 mol%). After reaction completion, the imine was isolated by flash chromatography (81%, 106 mg over three steps).  $^1\text{H}$  NMR (500 MHz,  $\text{CDCl}_3$ )  $\delta$  12.58 (1H, s), 9.60 (1H, d,  $J = 9.0$  Hz), 7.42 – 7.39 (3H, m), 7.07 (1H, t,  $J = 8.0$  Hz), 6.47 (1H, s), 2.66 – 2.59 (2H, m), 1.64 – 1.59 (2H, m), 1.45 – 1.39 (2H, m), 0.96 (3H, t,  $J = 7.5$  Hz).  $^{13}\text{C}$  NMR (125 MHz,  $\text{CDCl}_3$ )  $\delta$  183.80, 157.51, 139.53, 136.11, 130.84, 130.54, 129.22, 127.90, 126.32, 123.01, 105.86, 30.92, 29.57, 22.77, 14.03. HRMS-ESI calc'd for  $\text{C}_{15}\text{H}_{17}\text{ClNO}$  [M+H] 262.0999, found

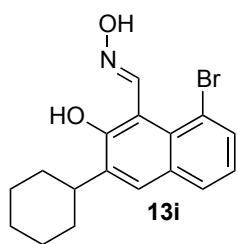

Oxime **13i** was prepared in 90% yield according to a general procedure for benzannulation of siloxy alkynes and isoquinoline *N*-oxides.  $^1\text{H}$  NMR (500 MHz,  $\text{CDCl}_3$ )  $\delta$  9.72 (1H, s), 7.76 (1H, d,  $J = 7.5$  Hz), 7.68 (1H, d,  $J = 8.0$  Hz), 7.59 (1H, s), 7.14 – 7.10 (1H, m), 3.10 – 3.07 (1H, m), 2.04 – 2.01 (2H, m), 1.88 – 1.86 (2H, m), 1.80 – 1.75 (1H, m), 1.45 – 1.37 (m, 4H), 1.35 – 1.24 (m, 1H).  $^{13}\text{C}$  NMR (125 MHz,  $\text{CDCl}_3$ )  $\delta$  157.00, 152.57, 137.85, 133.34, 130.79, 129.48, 129.18, 128.60, 123.95, 116.48, 37.29, 32.94, 26.94, 26.39. HRMS-ESI calc'd for  $\text{C}_{17}\text{H}_{19}\text{BrNO}_2$   $[\text{M}+\text{H}]$  348.0599, found  $[\text{M}+\text{H}]$  348.0608.

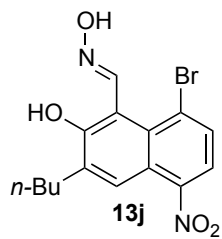

Oxime **13j** was prepared in 95% yield according to a general procedure for benzannulation of siloxy alkynes and isoquinoline *N*-oxides.  $^1\text{H}$  NMR (500 MHz,  $\text{CDCl}_3$ )  $\delta$  11.27 (1H, s), 9.45 (1H, s), 8.13 (1H, s), 7.82 (1H, d,  $J = 8.5$  Hz), 7.69 (1H, d,  $J = 8.5$  Hz), 7.43 (1H, s), 2.86 – 2.78 (2H, m), 1.72 – 1.62 (2H, m), 1.48 – 1.37 (2H, m), 0.96 (3H, t,  $J = 7.5$  Hz).  $^{13}\text{C}$  NMR (125 MHz,  $\text{CDCl}_3$ )  $\delta$  157.82, 151.56, 146.90, 136.87, 131.55, 131.08, 125.38, 122.37, 121.66, 120.53, 107.60, 31.15, 30.71, 22.58, 13.90. HRMS-ESI calc'd for  $\text{C}_{15}\text{H}_{16}\text{BrN}_2\text{O}_4$   $[\text{M}+\text{H}]$  367.0293, found  $[\text{M}+\text{H}]$  367.0296.

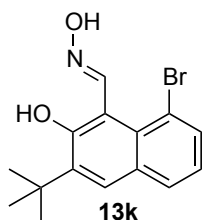

Oxime **13k** was prepared in 85% yield according to a general procedure for benzannulation of siloxy alkynes and isoquinoline *N*-oxides.  $^1\text{H}$  NMR (500 MHz,  $\text{CDCl}_3$ )  $\delta$  9.70 (1H, s), 7.76 (1H, d,  $J = 7.5$ ), 7.74 – 7.67 (2H, m), 7.13 (1H, t,  $J = 8.0$  Hz), 1.50 (9H, s).  $^{13}\text{C}$  NMR (125 MHz,  $\text{CDCl}_3$ )  $\delta$  158.37, 152.62, 139.60, 133.47, 130.38, 129.83, 129.57, 128.89, 123.92, 116.13, 107.53, 35.35, 29.47. HRMS-ESI calc'd for  $\text{C}_{15}\text{H}_{17}\text{BrNO}_2$   $[\text{M}+\text{H}]$  322.0443, found  $[\text{M}+\text{H}]$  322.0452.

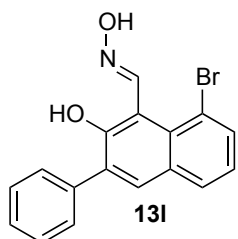

Oxime **13l** was prepared in 91% yield according to a general procedure for benzannulation of siloxy alkynes and isoquinoline *N*-oxides.  $^1\text{H}$  NMR (500 MHz,  $\text{CDCl}_3$ )  $\delta$  9.75 (1H, s), 7.88 – 7.81 (1H, m), 7.78 (1H, s), 7.77 – 7.73 (1H, m), 7.64 (2H, dd,  $J = 5.0, 3.0$  Hz), 7.53 – 7.46 (2H, m), 7.46 – 7.39 (1H, m), 7.19 (1H, t,  $J = 8.0$  Hz).  $^{13}\text{C}$  NMR (125 MHz,  $\text{CDCl}_3$ )  $\delta$  156.20, 152.16, 136.89, 134.22, 133.29, 132.24, 130.62, 130.36, 129.47, 129.07, 128.26, 127.89, 124.46, 116.61, 107.72. HRMS-ESI calc'd for  $\text{C}_{17}\text{H}_{13}\text{BrNO}_2$   $[\text{M}+\text{H}]$  342.0130, found  $[\text{M}+\text{H}]$  342.0123.

## Supplementary References

1. Schramm, M. P.; Shubinets, V. Kozmin, S. A. Preparation and [2+2] Cycloaddition of 1-Triisopropylsiloxy-1-hexyne with Methyl Crotonate: 3-Butyl-4-methyl-2-triisopropylsiloxy-cyclobut-2-enecarboxylic Acid Methyl Ester. *Org. Synth.* **87**, 253-263 (2010)
2. Tomioka, K; Shioya, Y; Nagaoka, Y; Yamada, K. Electronic and steric control in regioselective addition reactions of organolithium reagents with enalimines. *J. Org. Chem.* **66**, 7051-7054 (2001).
3. Fioravanti, R; Biavia, M; Porretta, G,C; Landolfi, C; Simonetti, N; Villa, A; Conte, E; Porta-Puglia, A. Research on antibacterial and antifungal agents. XI. Synthesis and antimicrobial activity of N-heteroaryl benzylamines and their Schiff bases. *Eur. J. Med. Chem.* **30**, 123-132 (1995).
4. Afarinkia, K.; Bearpark, M. J.; Ndibwami, A. Computational and experimental investigation of the Dieals-Alder cycloadditions of 4-chloro-2(H)-pyran-2-one. *J. Org. Chem.* **68**, 7158-7166 (2003).
5. Katzenellenbogen, J. A.; Boulanger, W. A. Structure-activity study of 6-substituted 2 pyranones as inactivators of  $\alpha$ -chymotrypsin. *J. Med. Chem.* **29**, 1159-1163 (1986).
6. Dorsch, D; Jonczyk, A; Hoelzemann, G; Amendt, C; Zenke, F. Preparation of 2,4-diaryl-substituted [1,8]naphthyridines as kinase inhibitors for use against cancer. *PCT Int. Appl.* WO 2012000595 A1 20120105 (2012).
7. Barber, C, G.; Dickinson, R, P; Fish, P, V. Selective urokinase-type plasminogen activator (uPA) inhibitors. Part 3: 1-Isoquinolinylguanidines. *Bioorganic & Medicinal Chemistry Letters* **14**, 3227-3230 (2004).
8. Navaneetham, N. S.; Rajasekar, N.; Kalyanasundaram, R.; Soundararajan, S. Lanthanide perchlorate complexes of 4-chloroquinoline-1-oxide and 5-chloroisoquinoline-2-oxide. *Inorganica Chimica Acta* **2**, 277-282 (1987).

# NMR spectra of new compounds

## Compound 2

jc1-198-031412

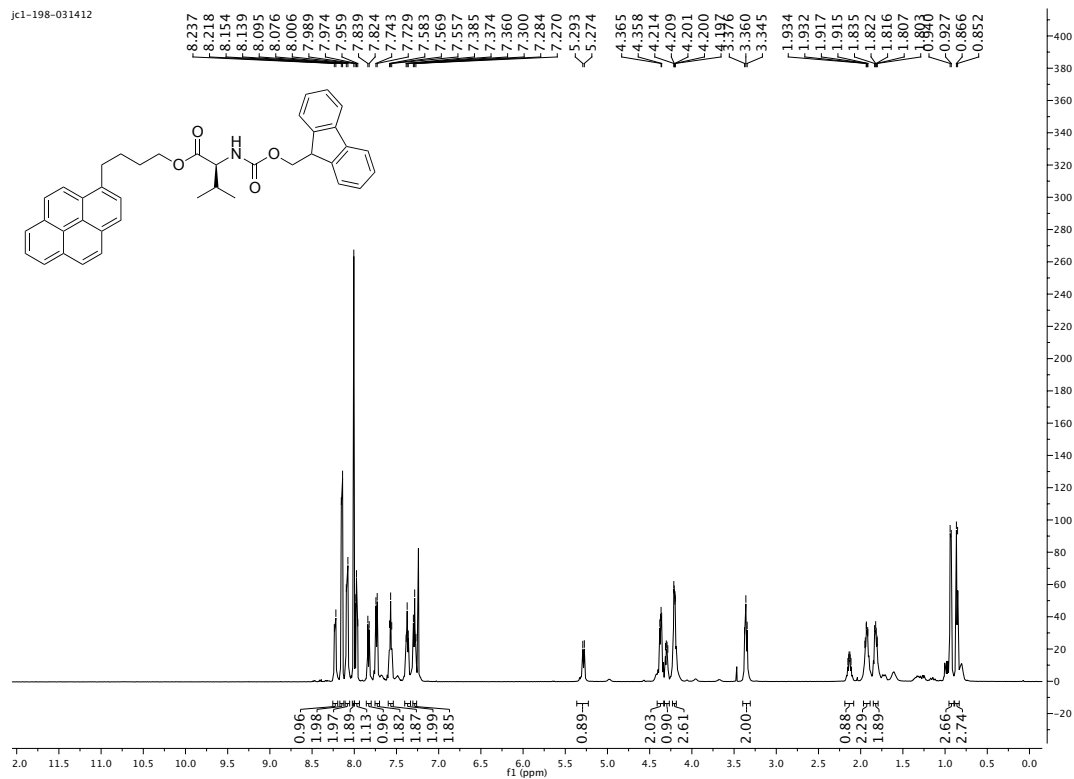

jc1-198-13C-031512

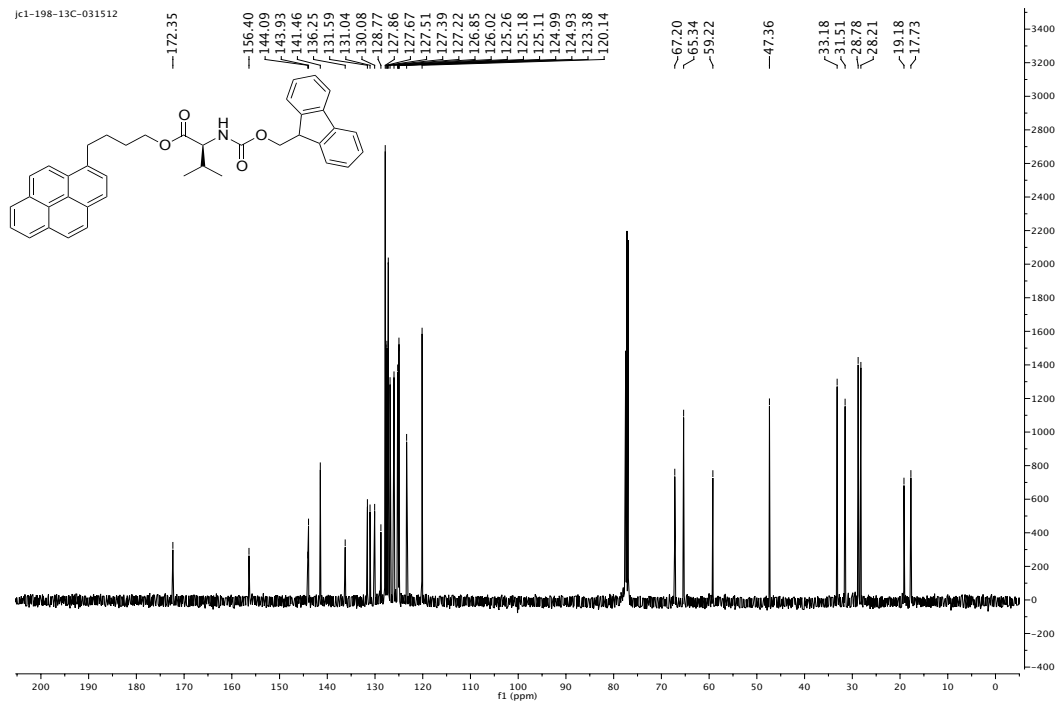

# Compound 3

jc2-157-122111

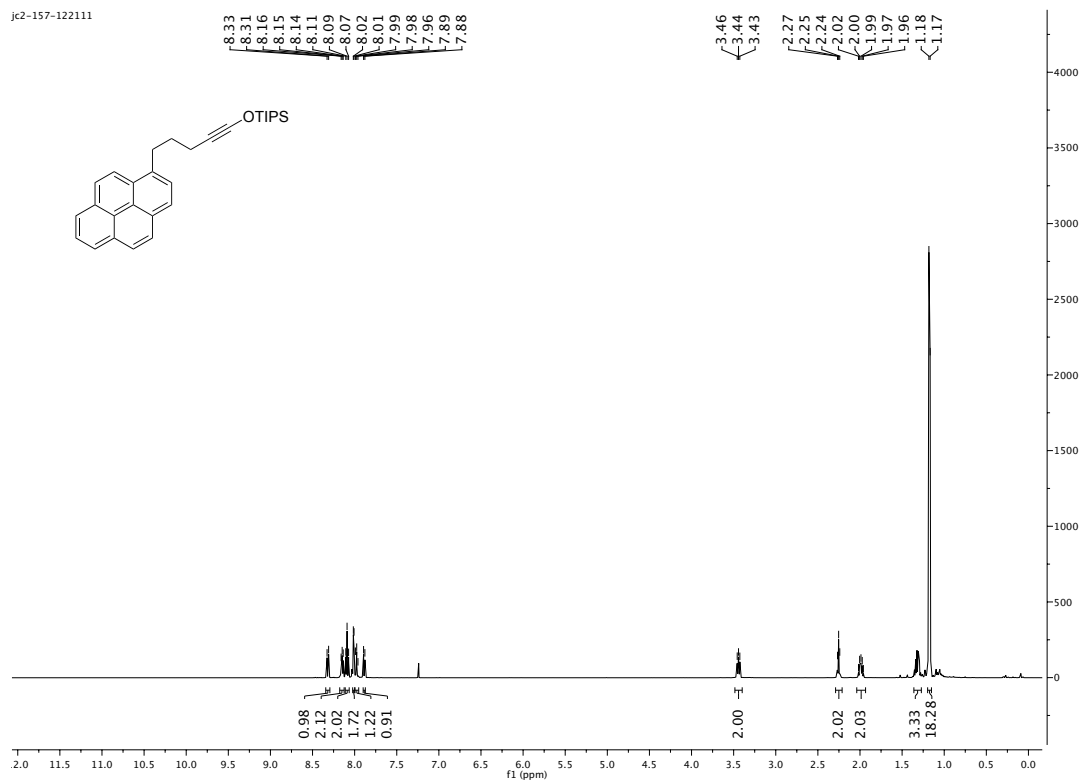

jc2-46-2-13C  
97/10/17, #5, 11

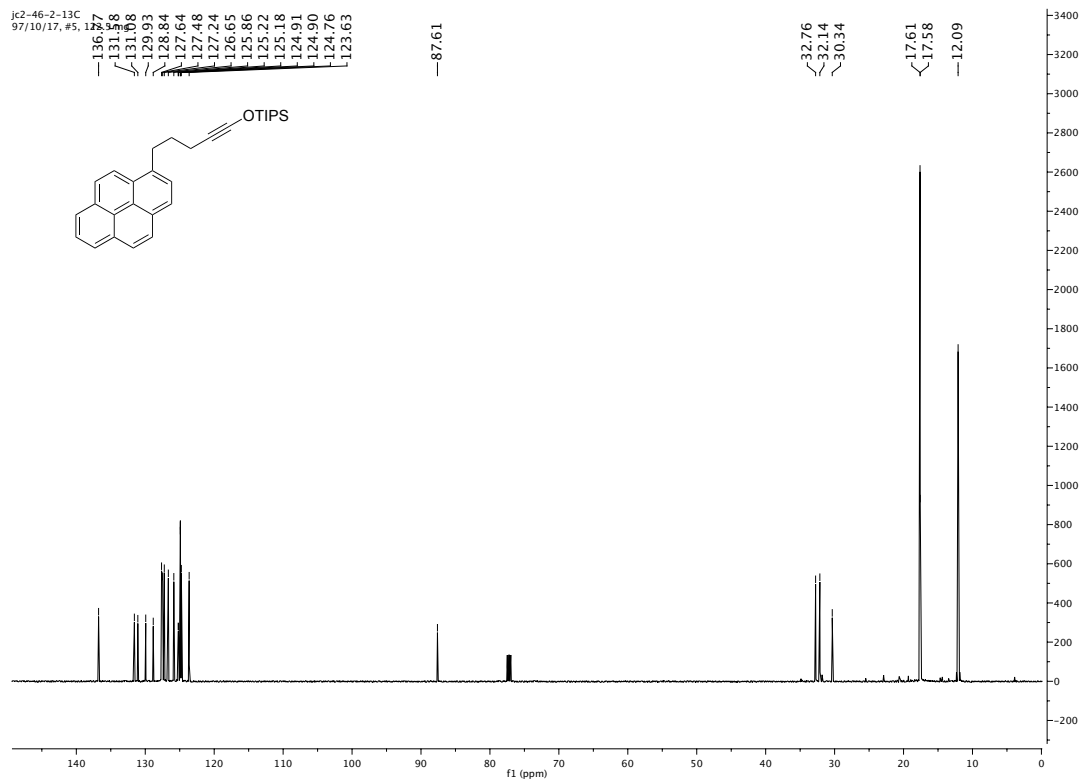

Compound 4

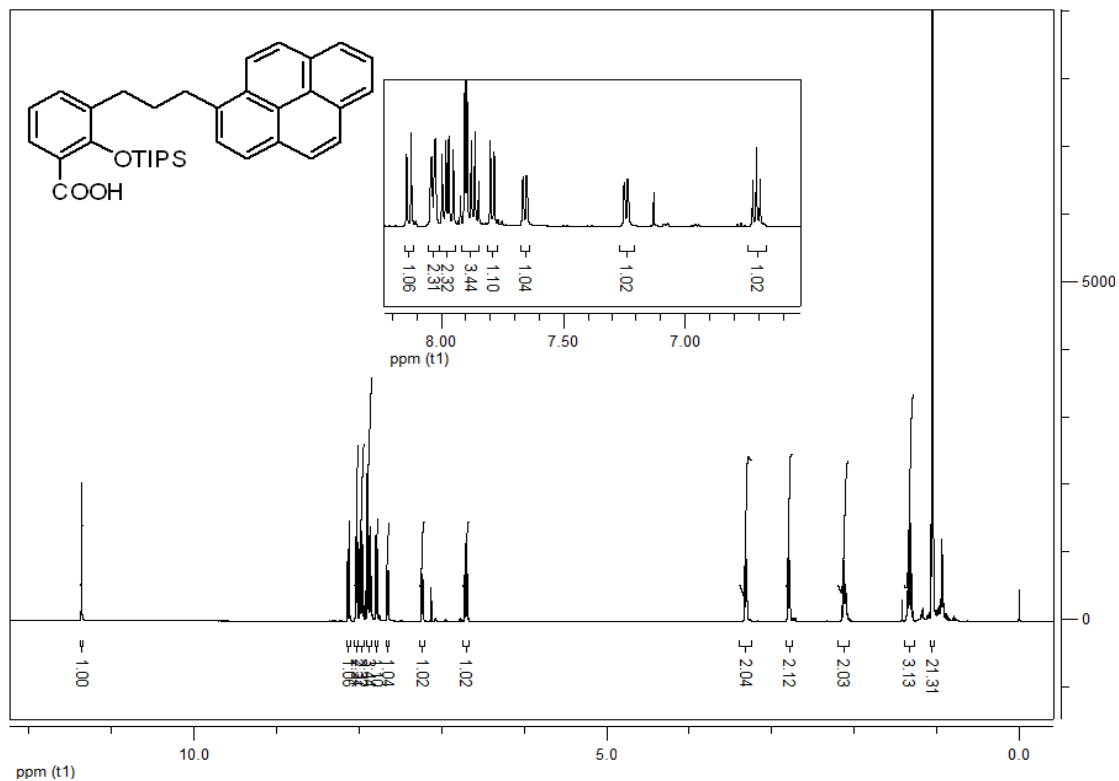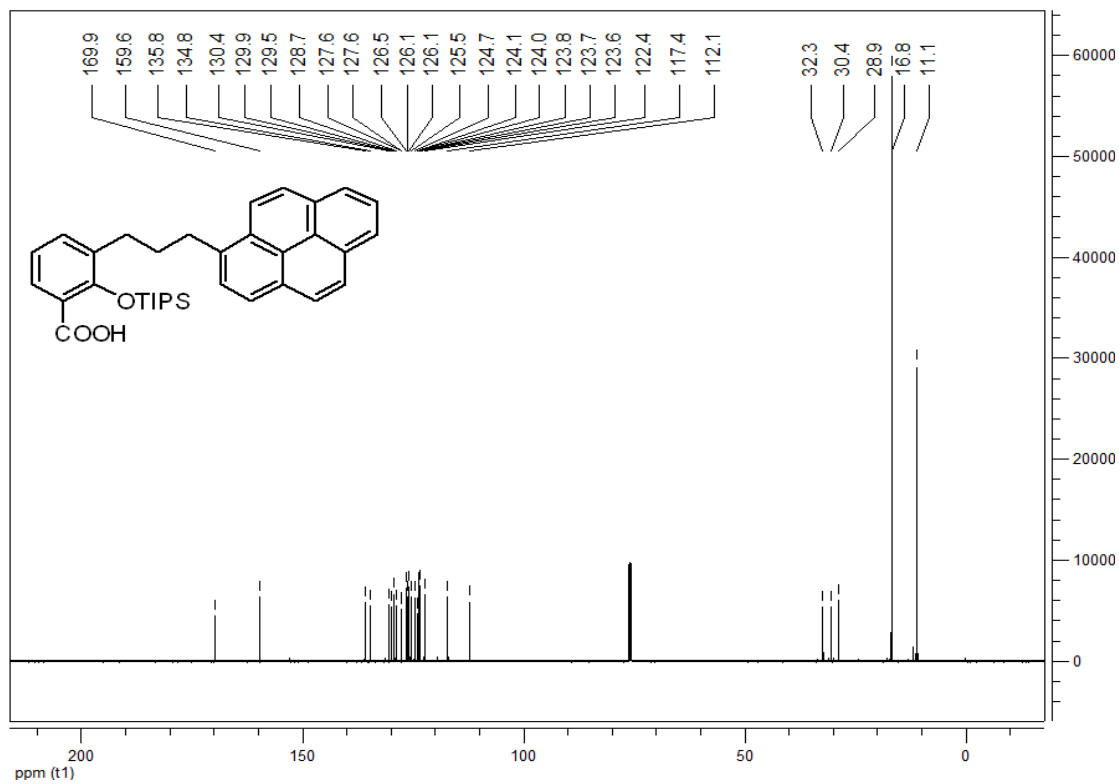

Compound 5

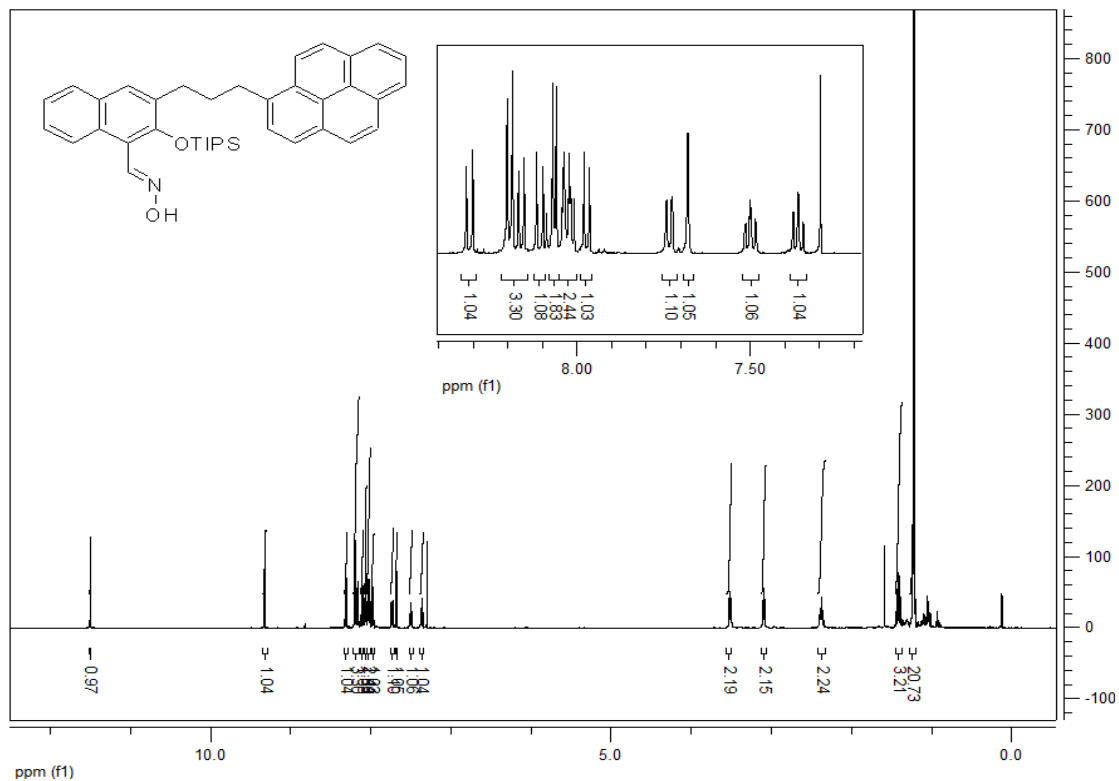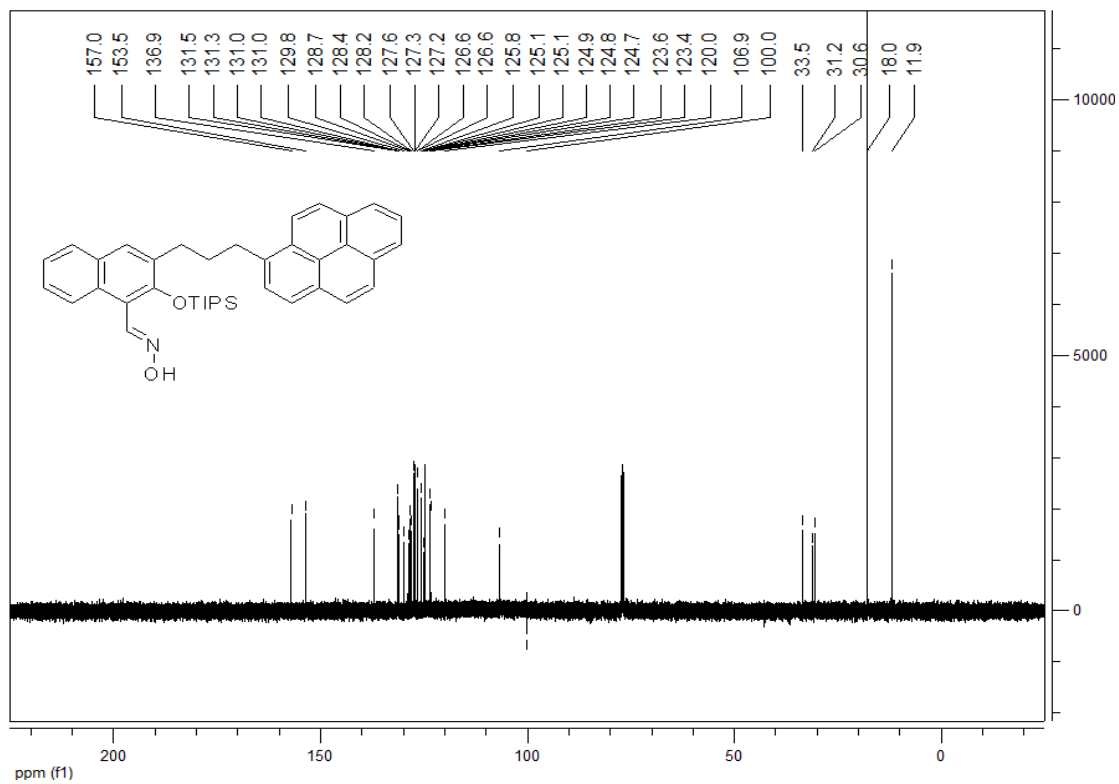

Compound 10a

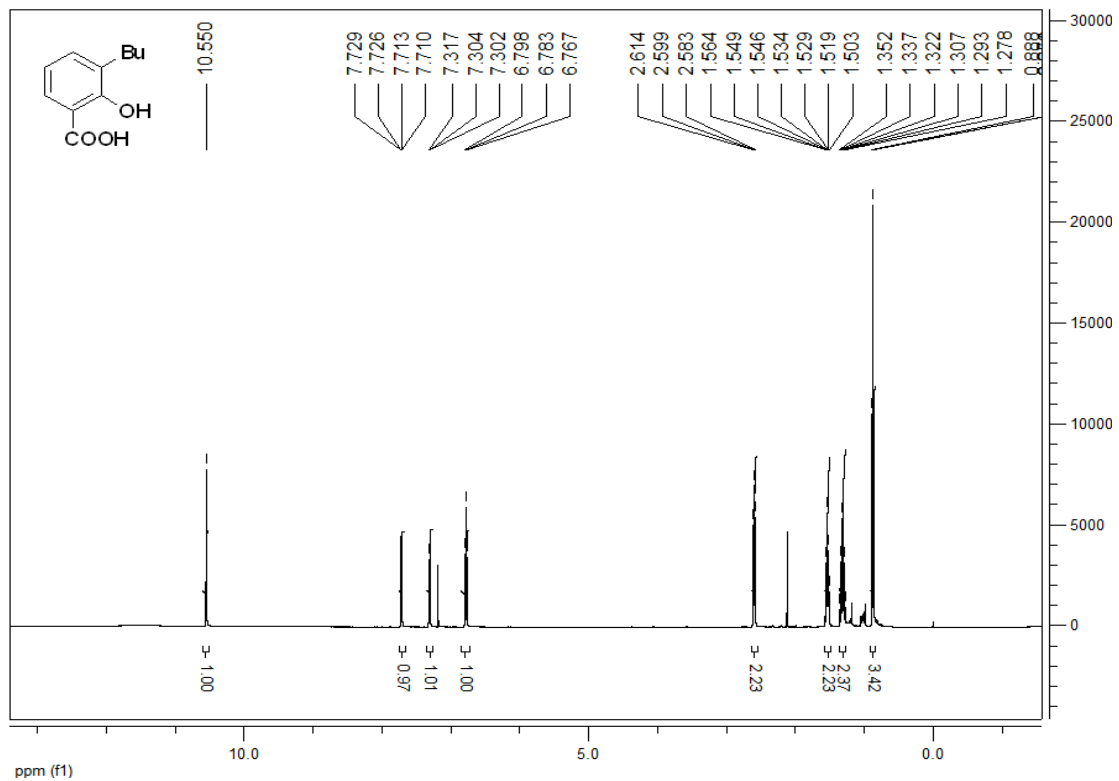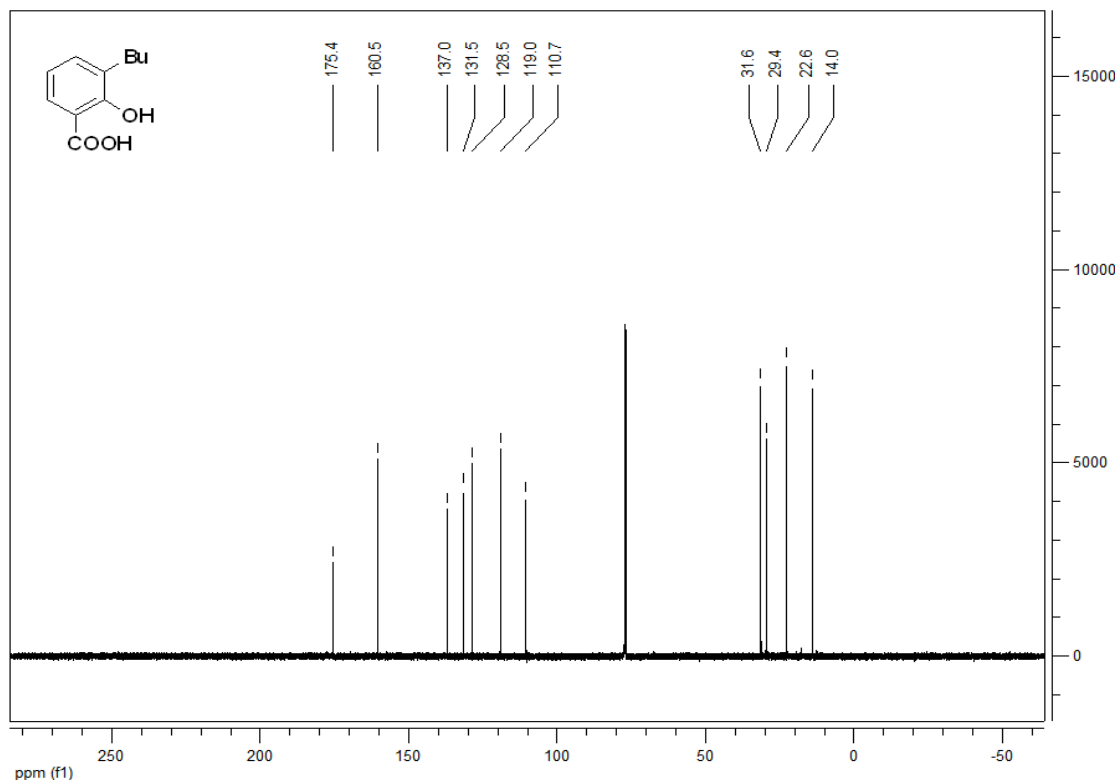





Compound 10c

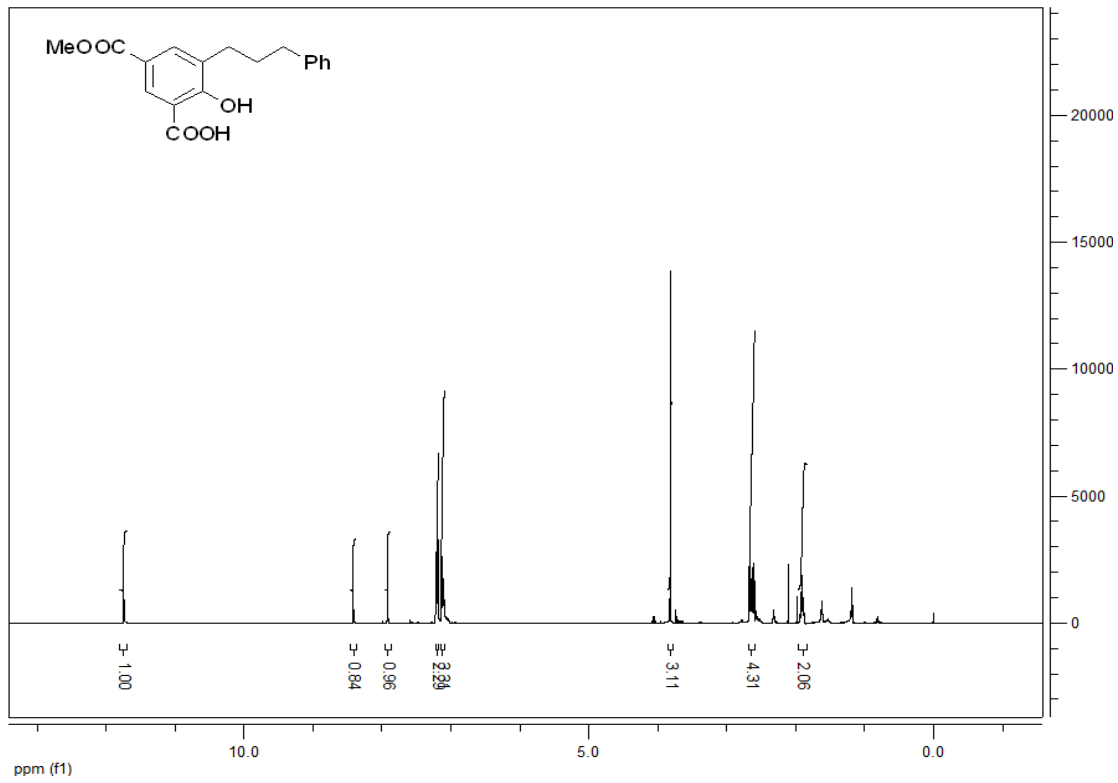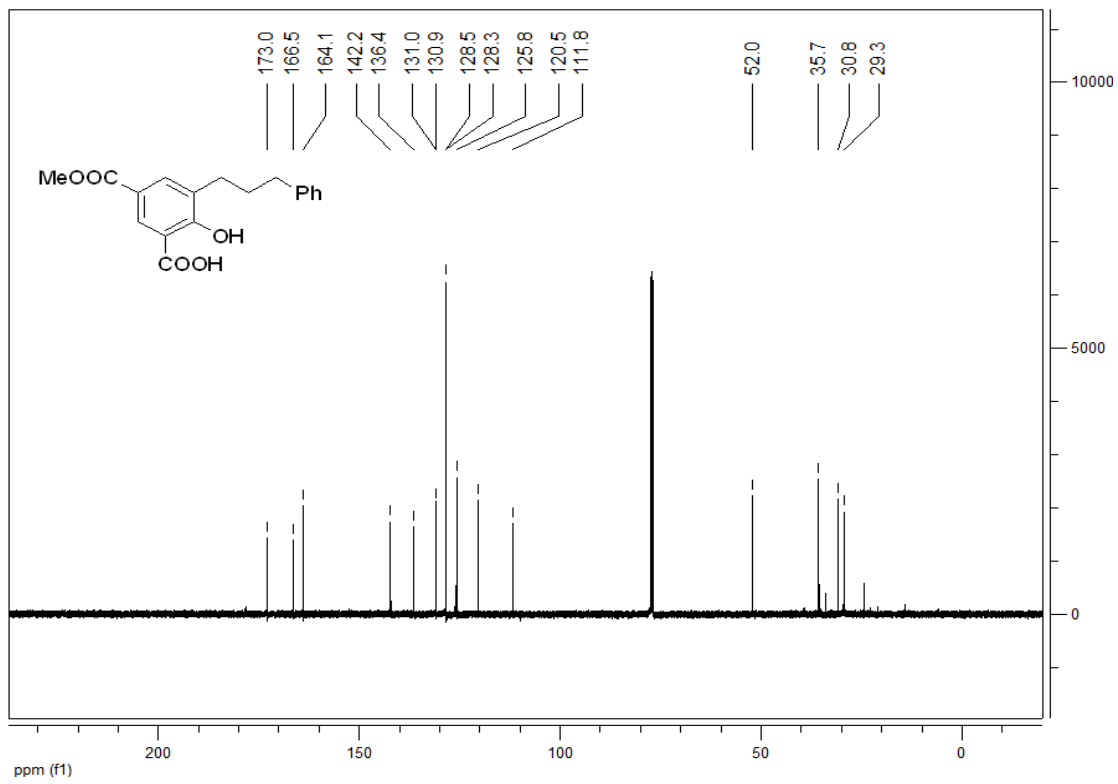

Compound 10d

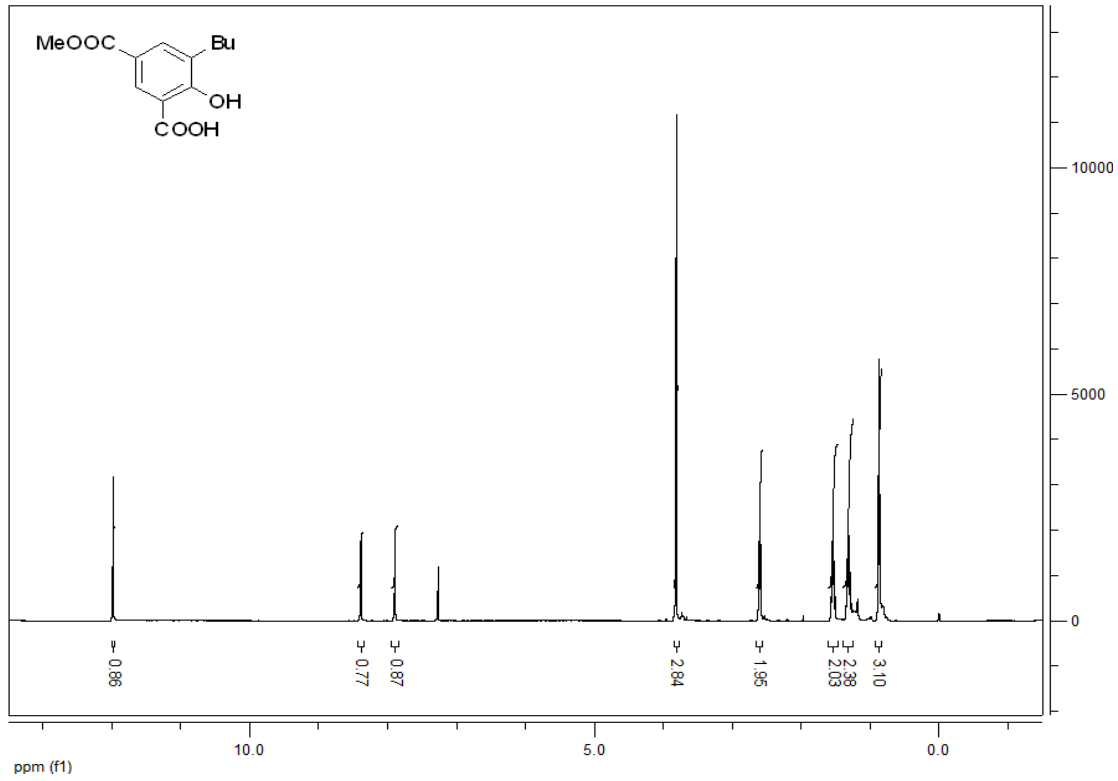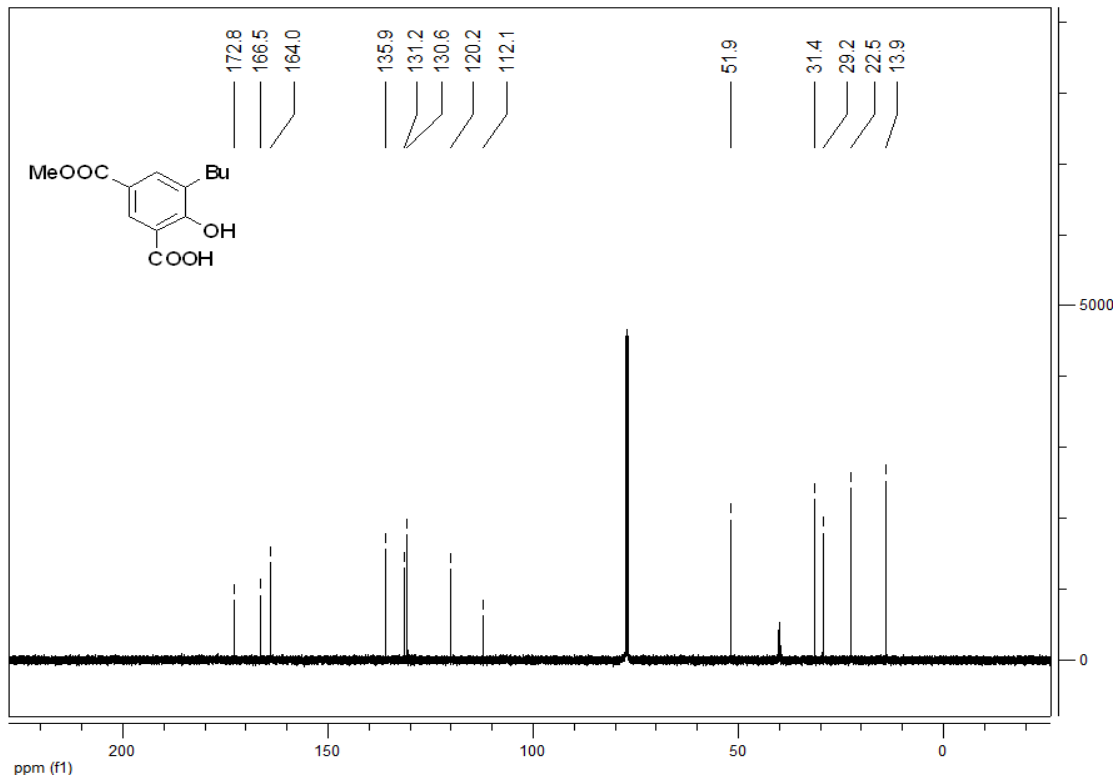

Compound 10e

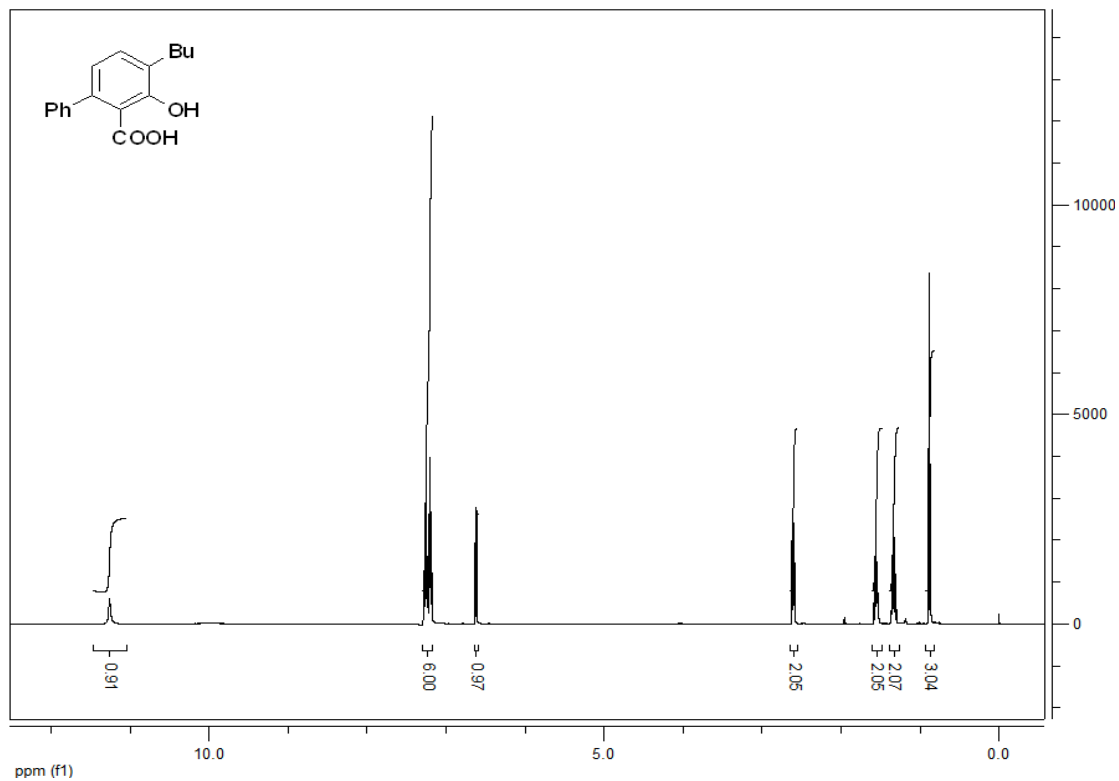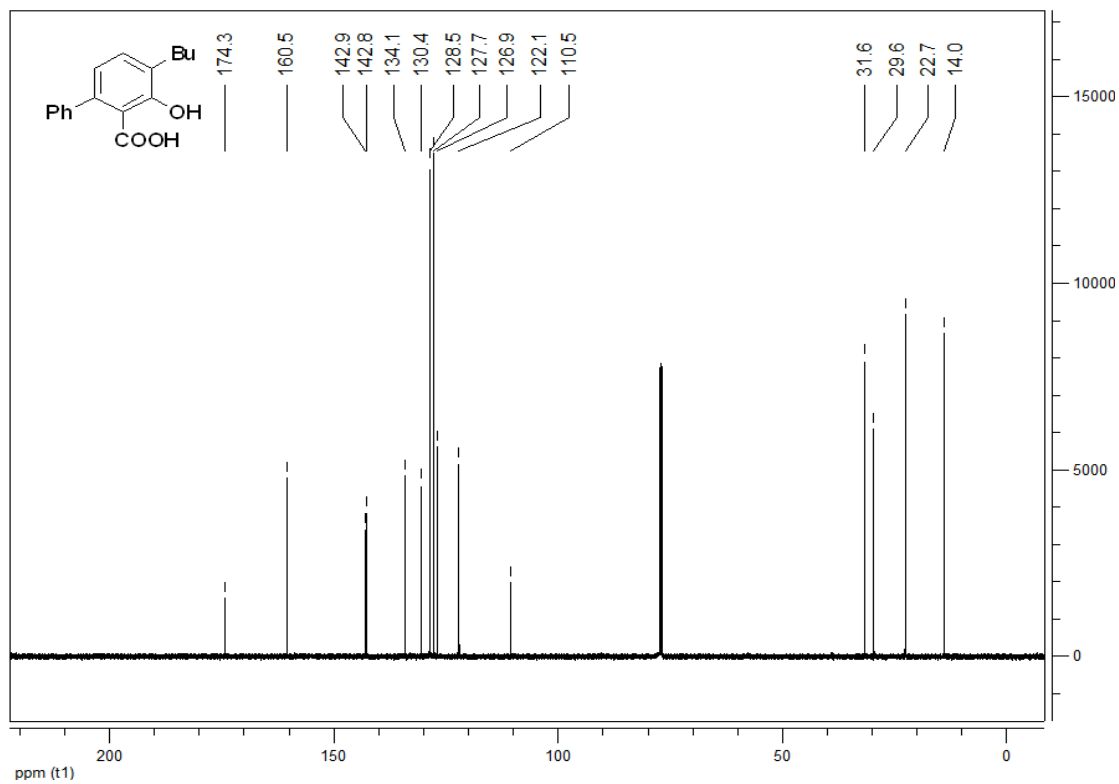

Compound 10f

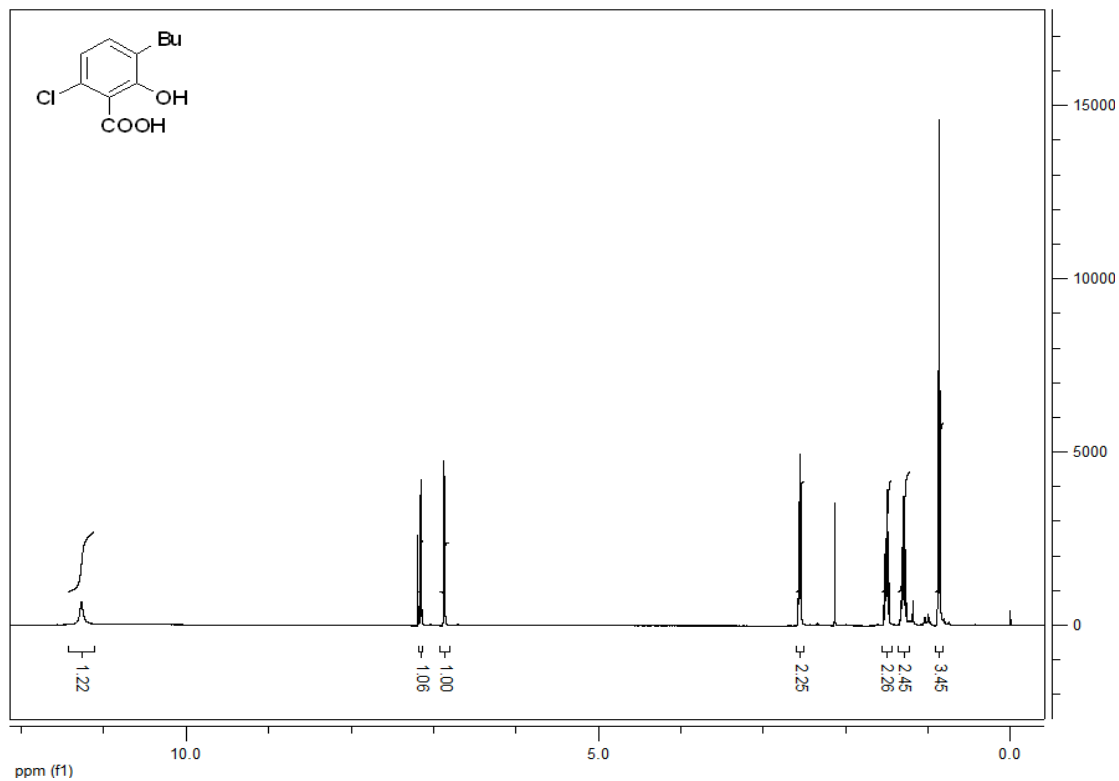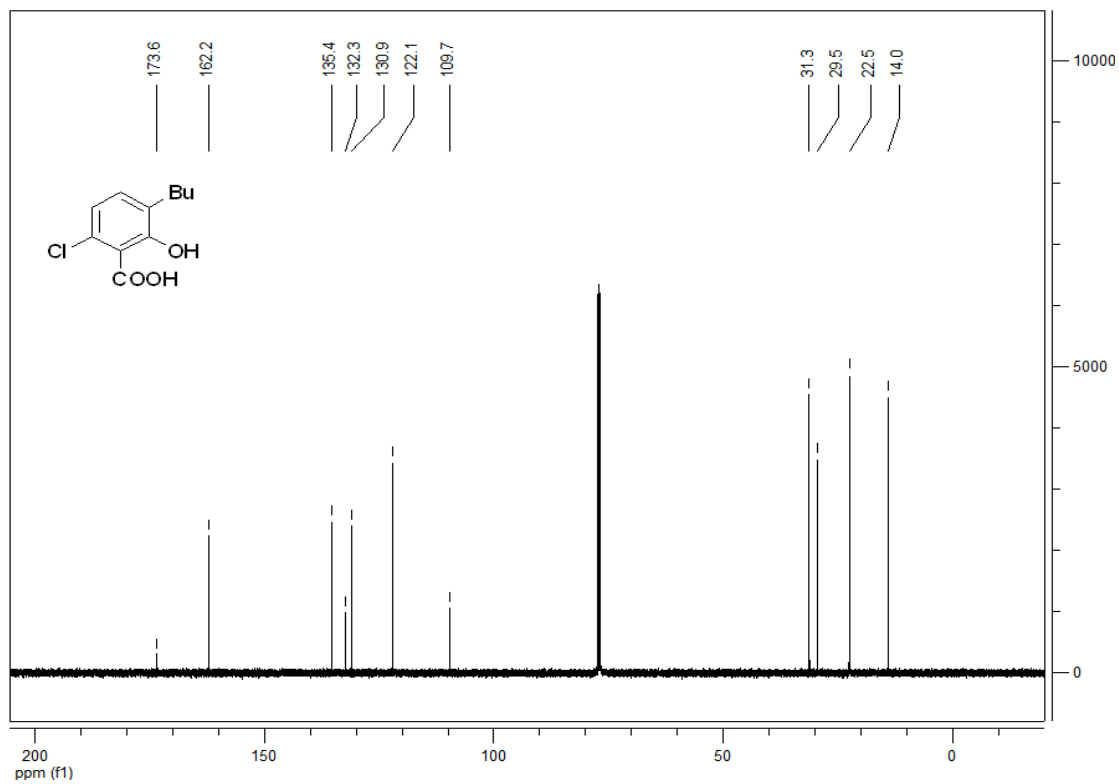

Compound 10g

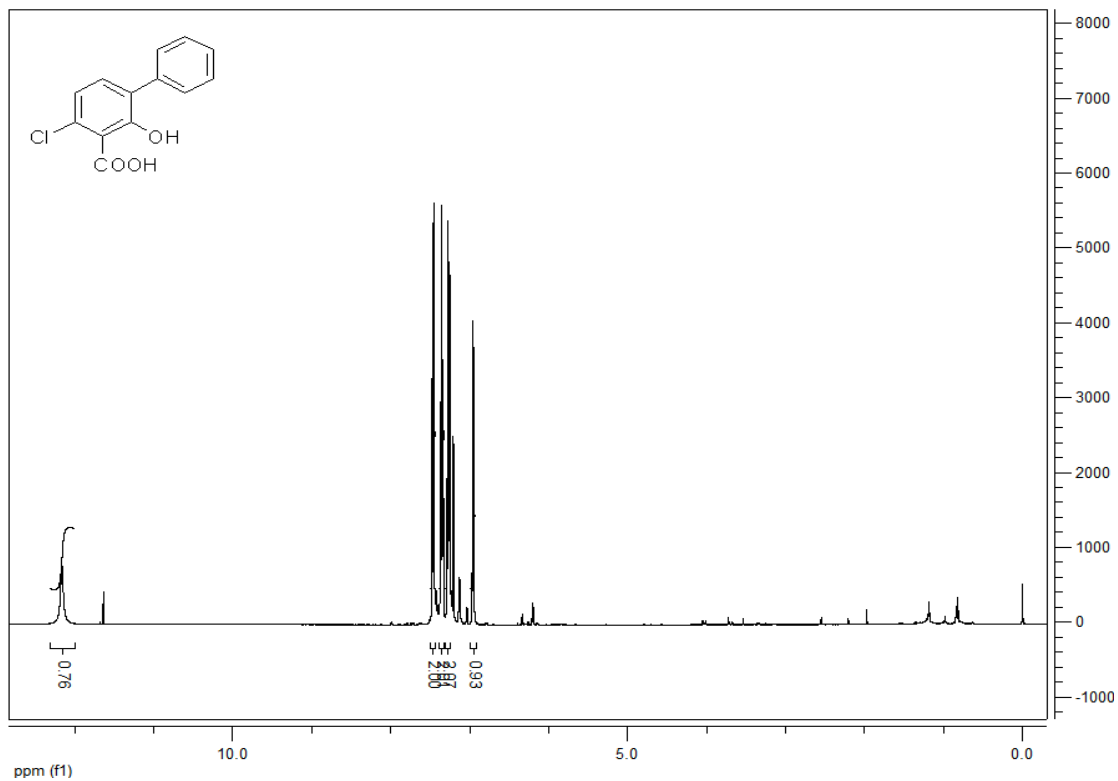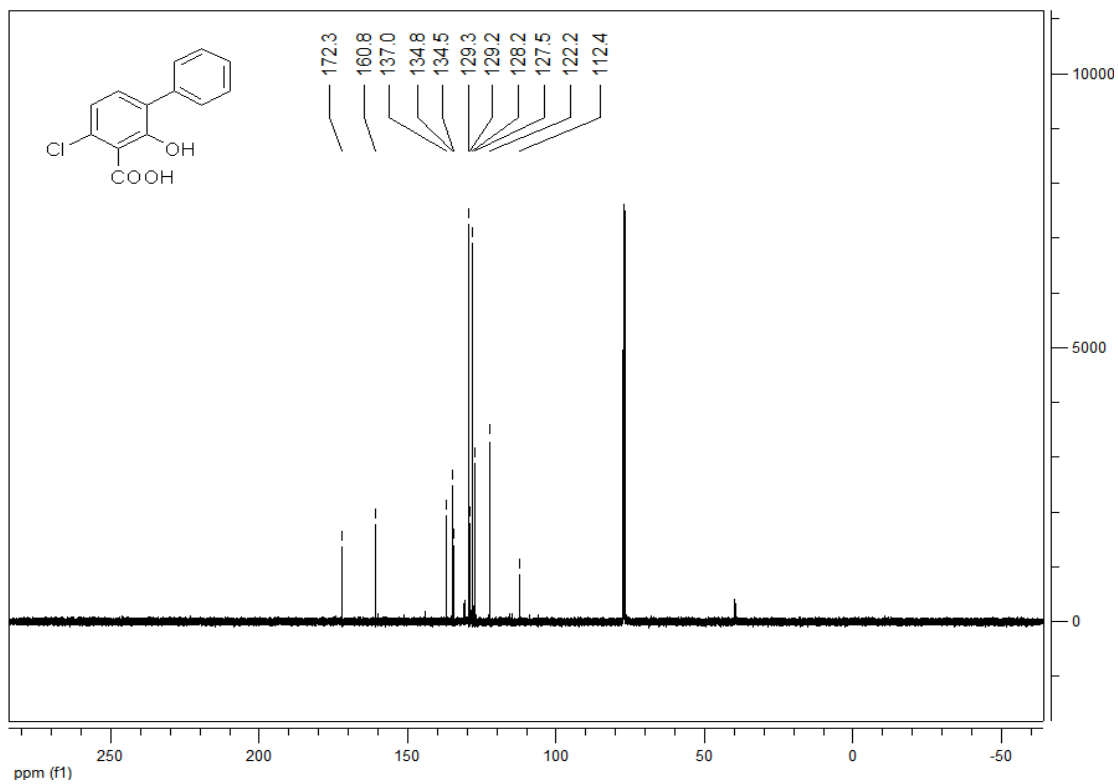

Compound 10h

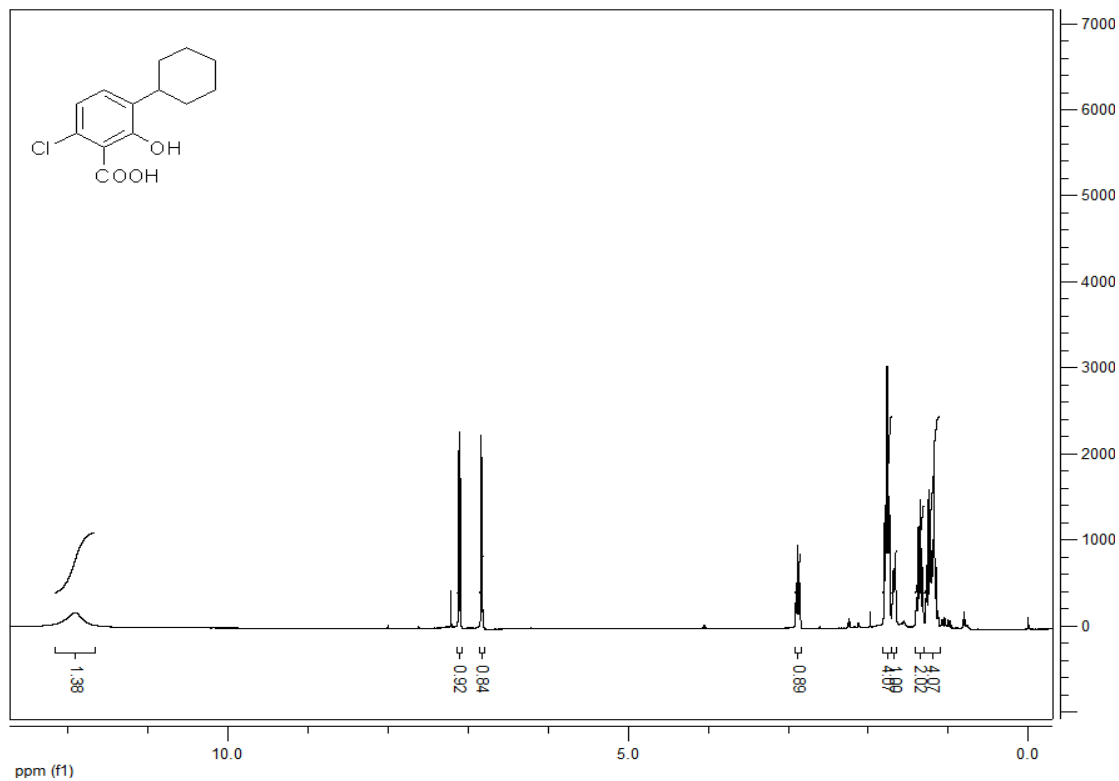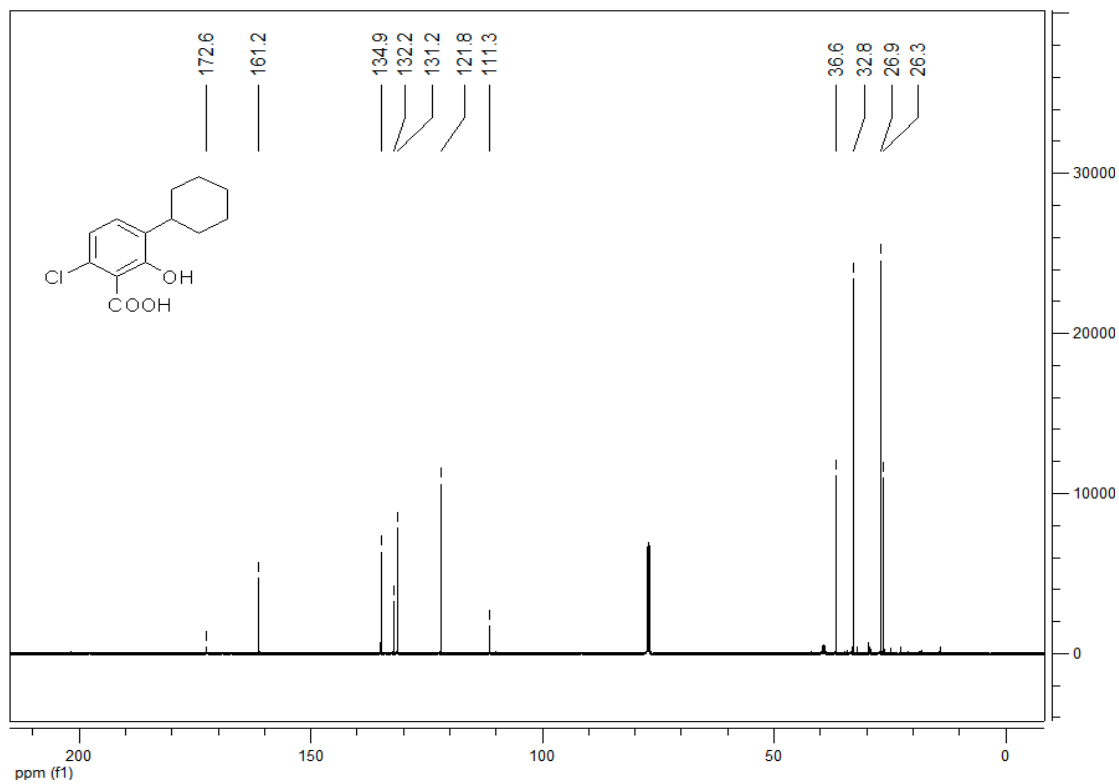

Compound 10i

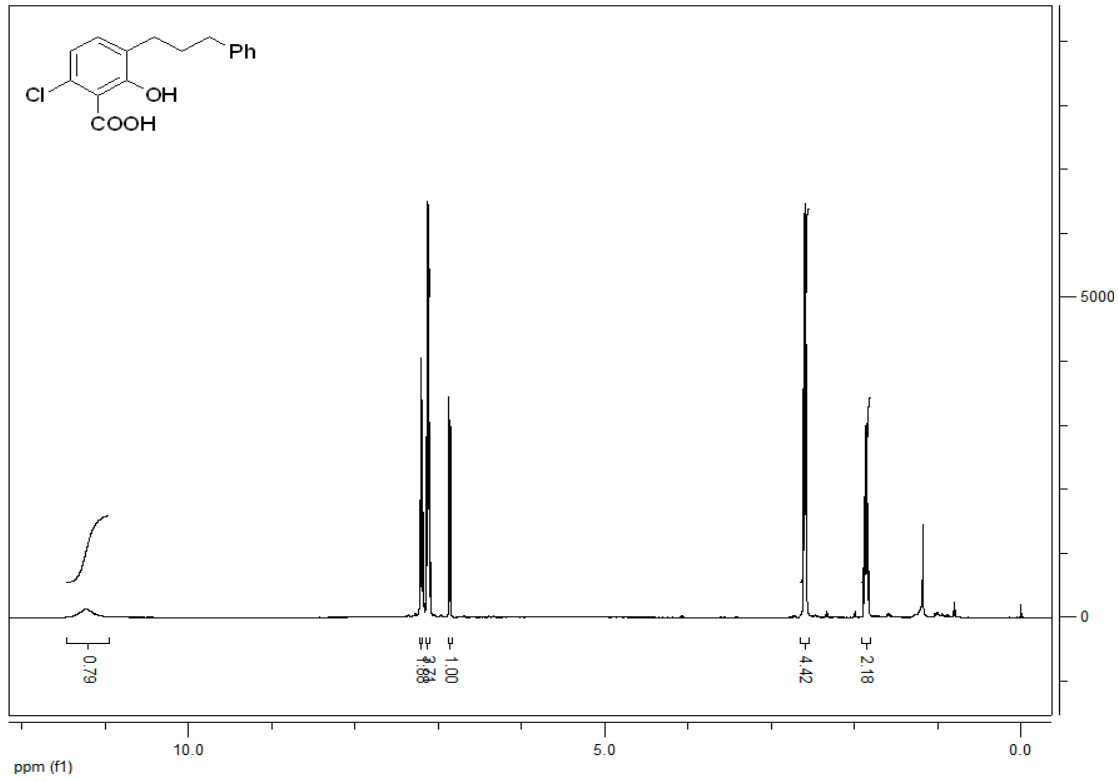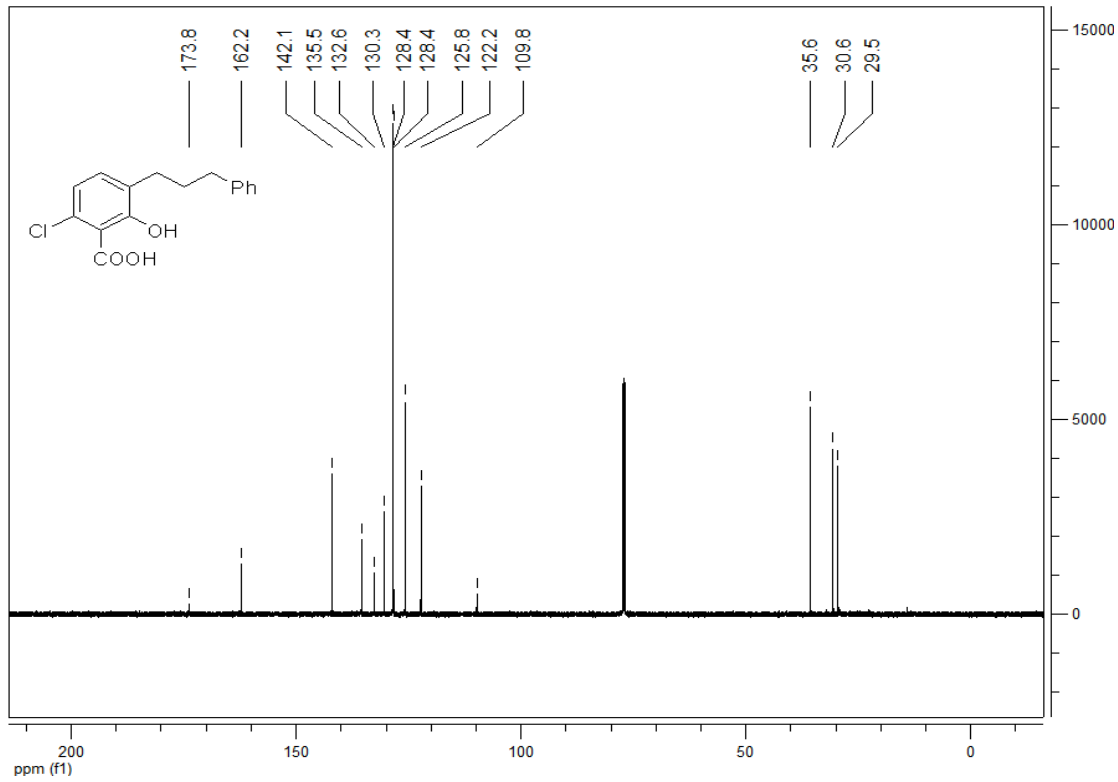



Compound 10j

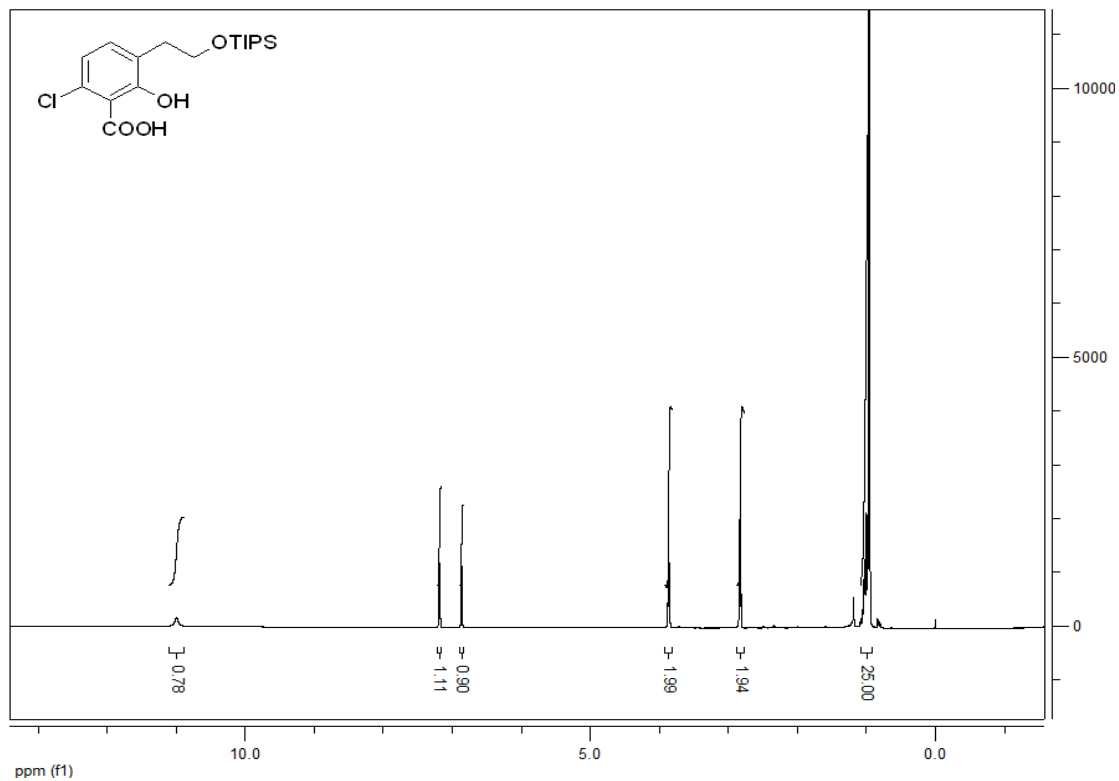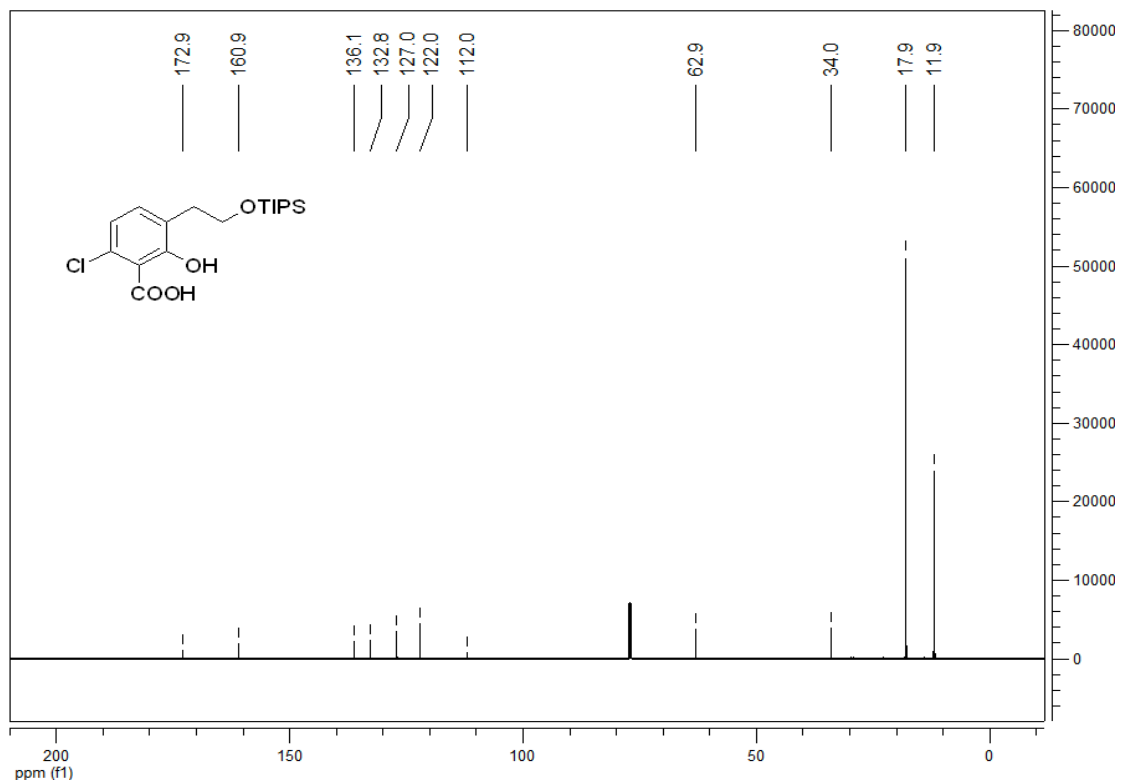

Compound 10k

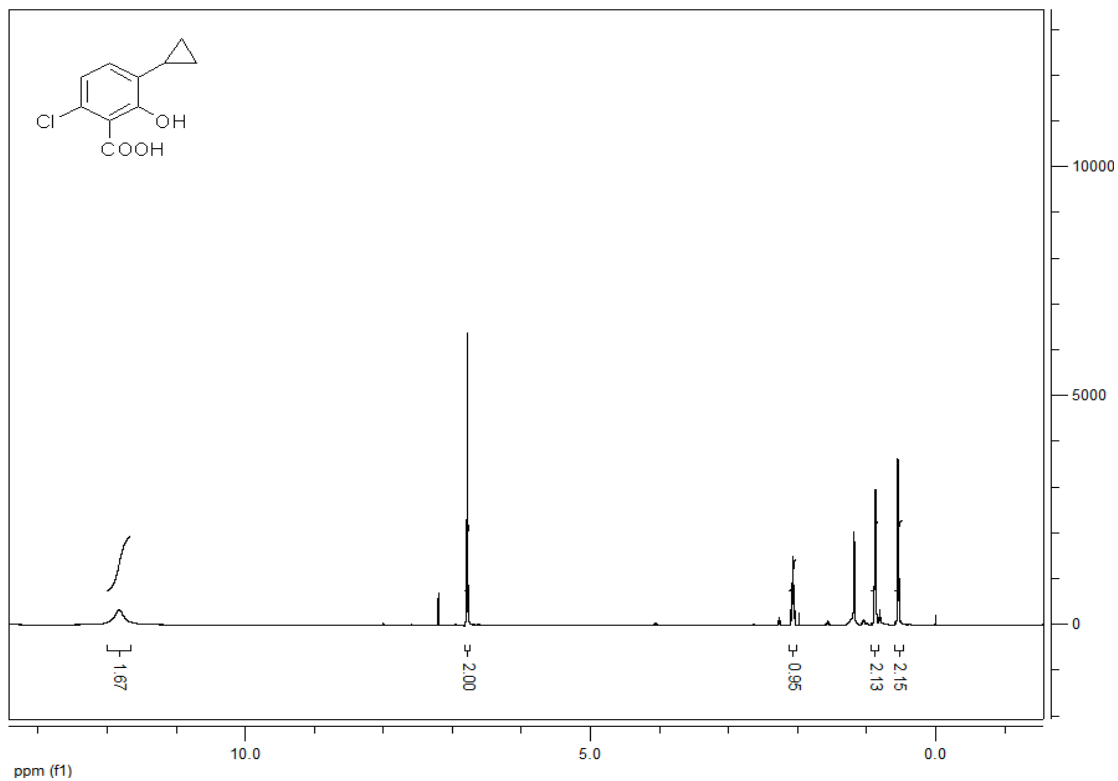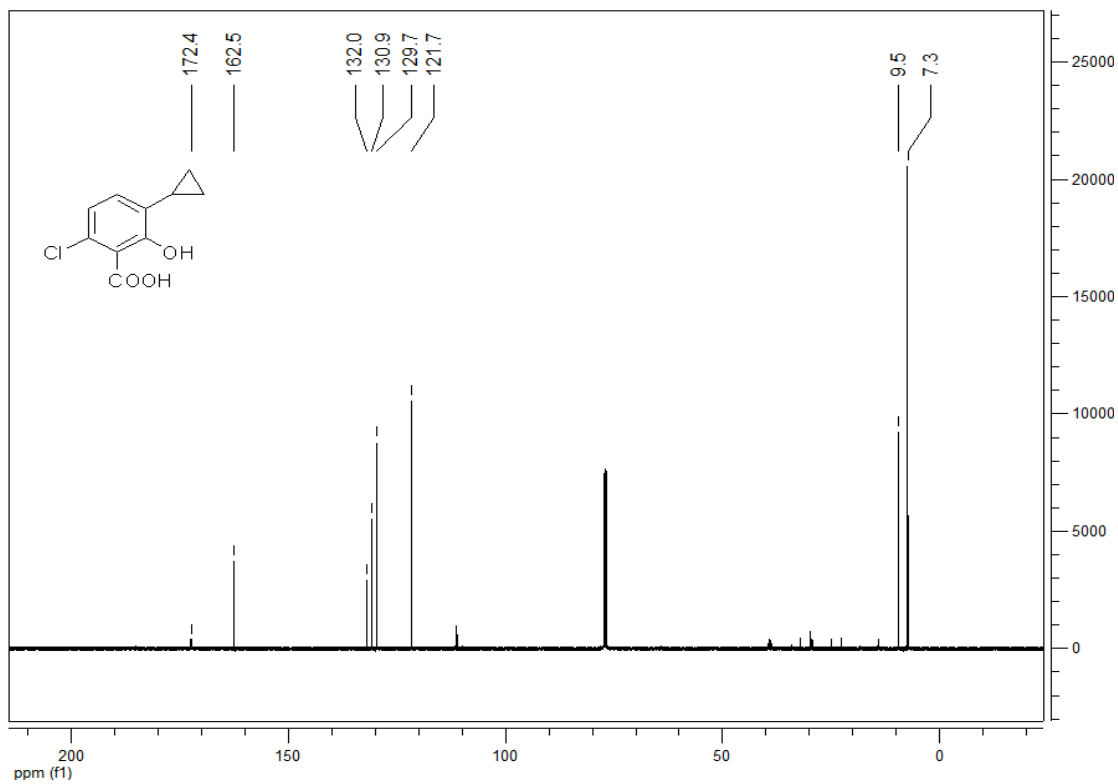

Compound 10I

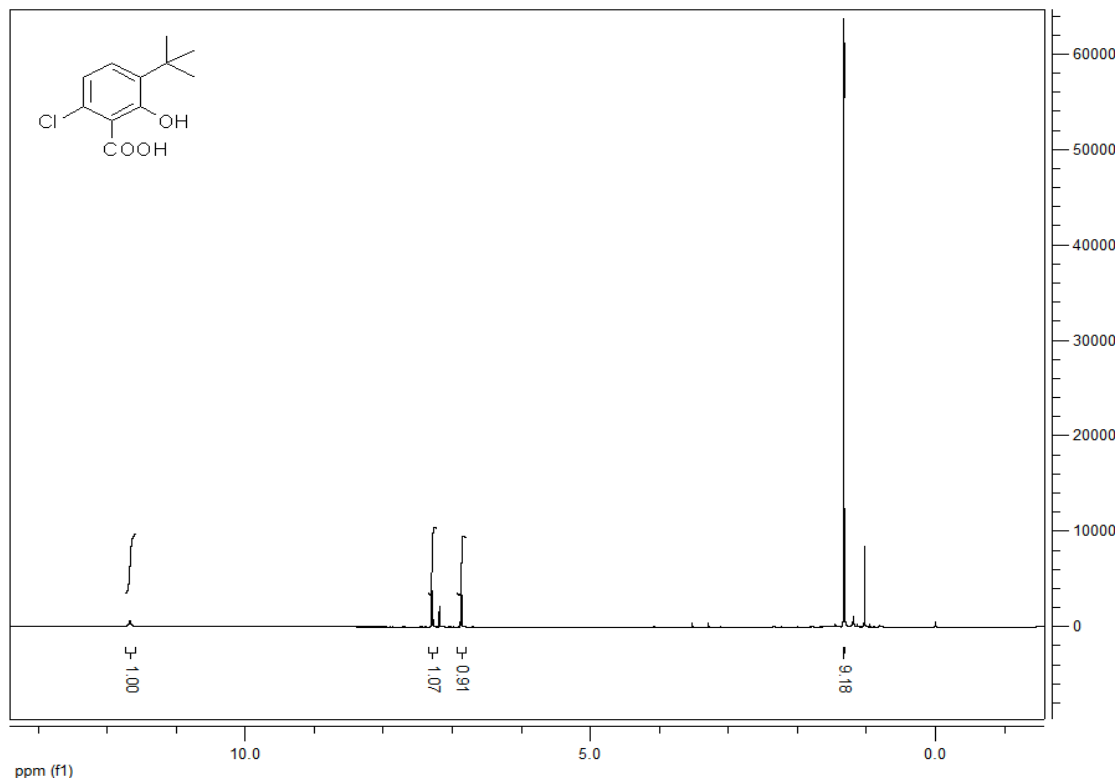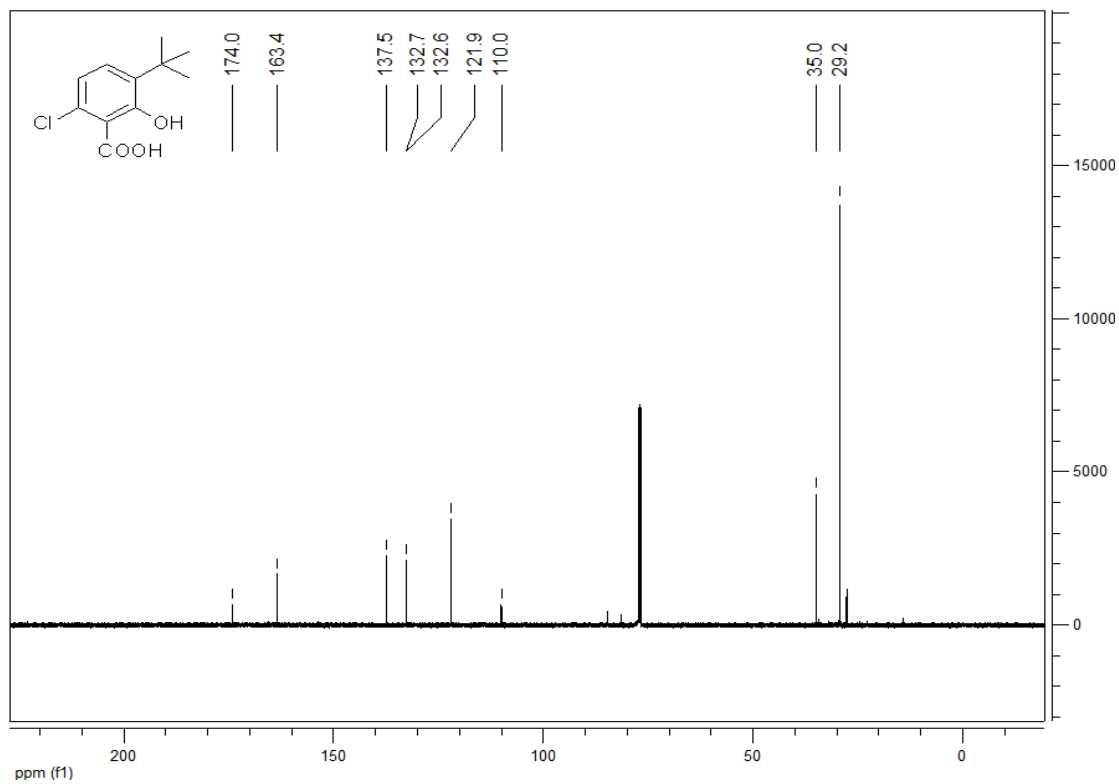

Compound 13a

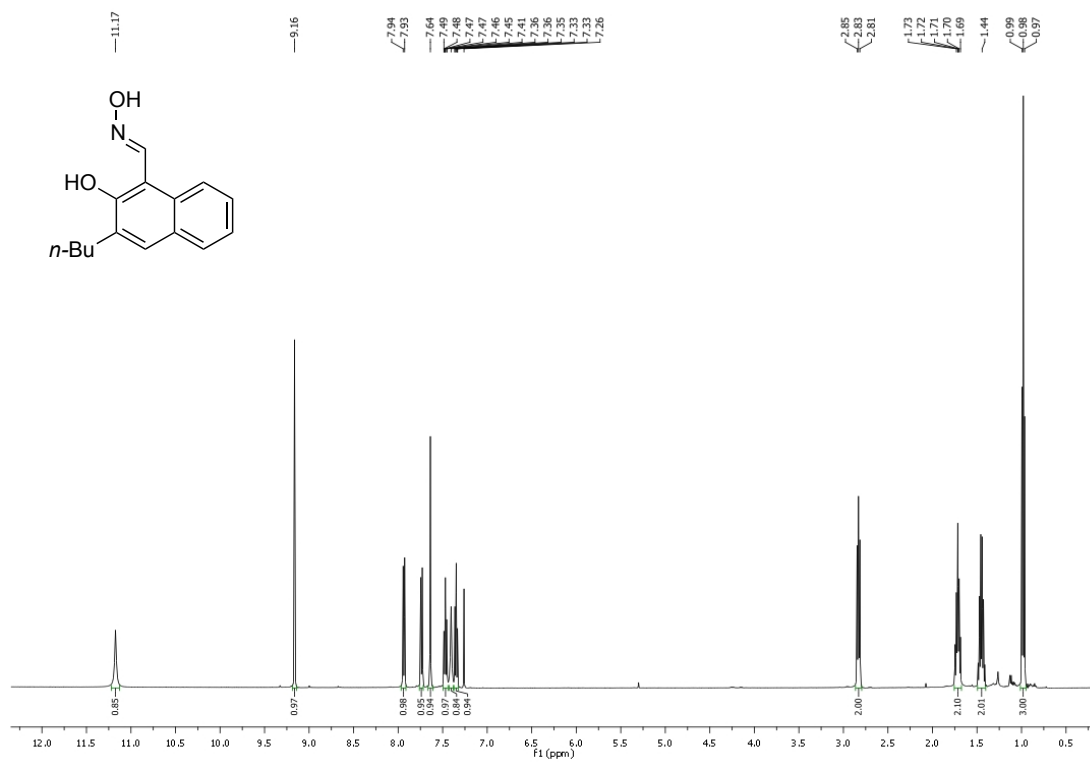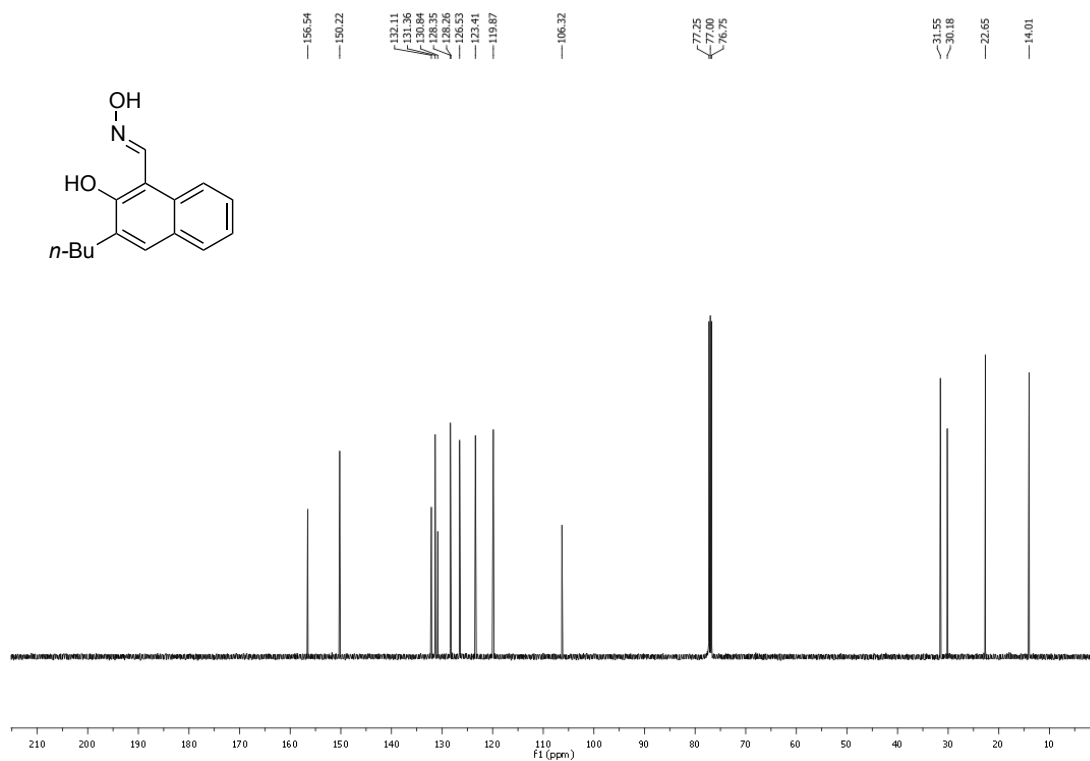

Compound 13b

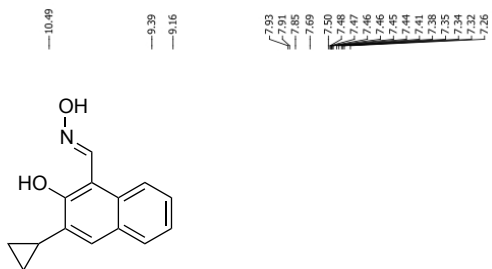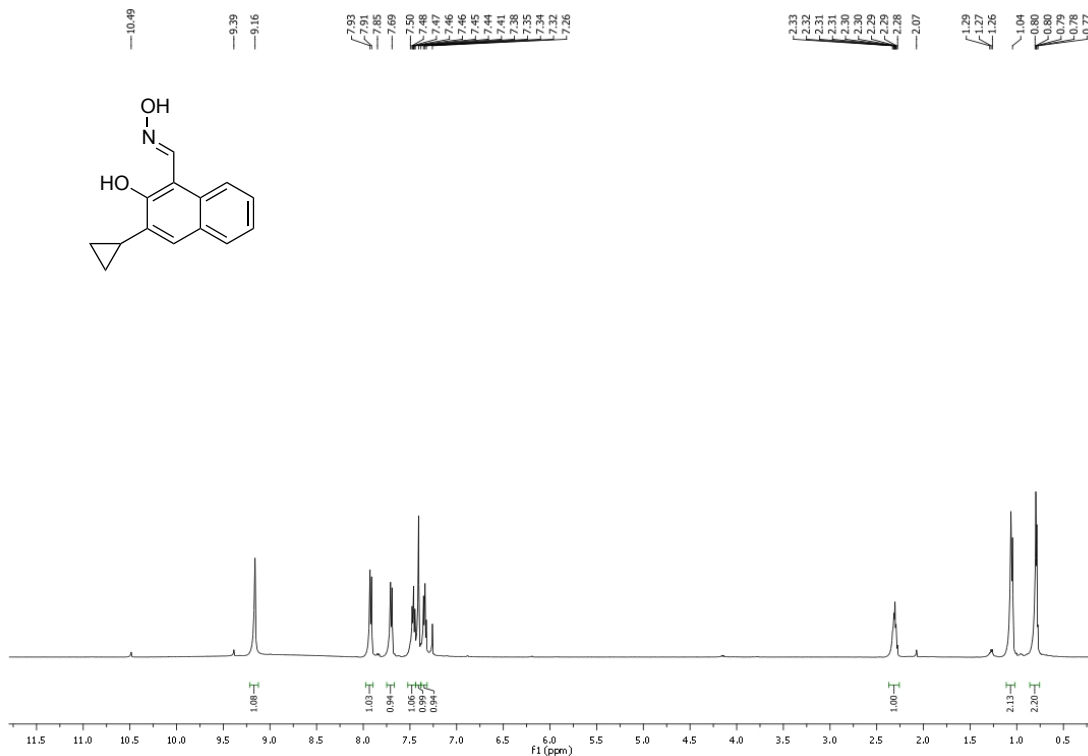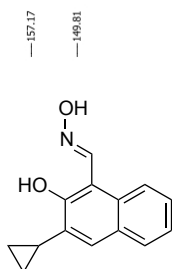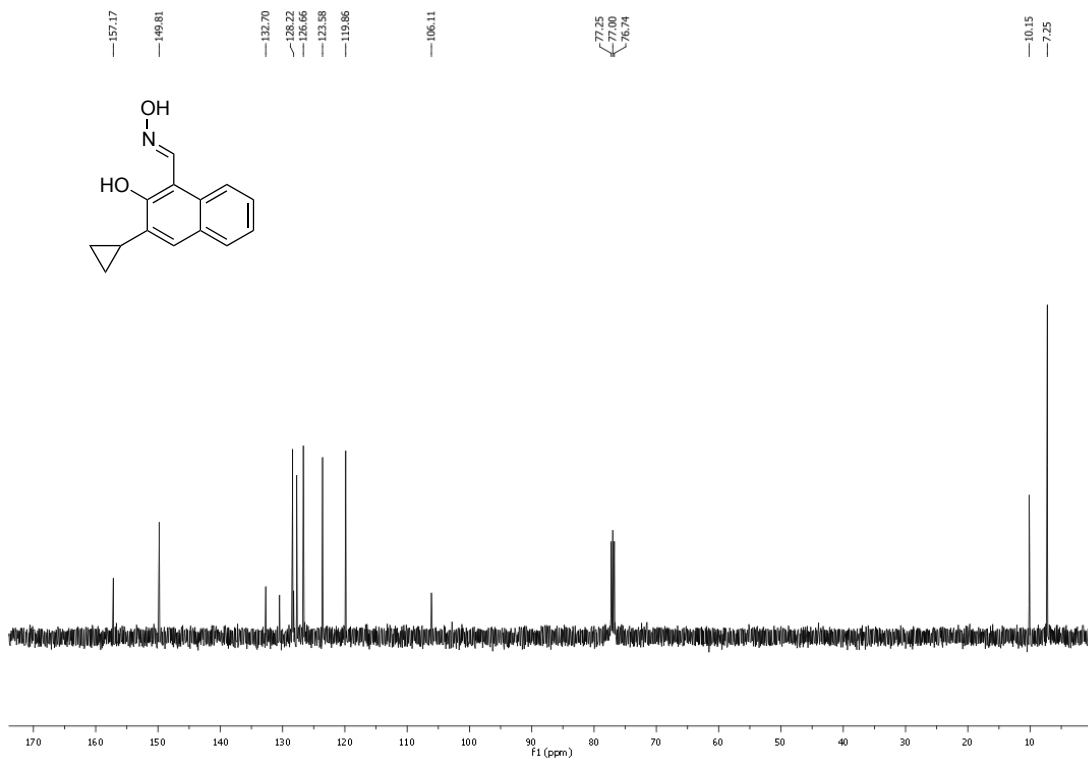

Compound 13c

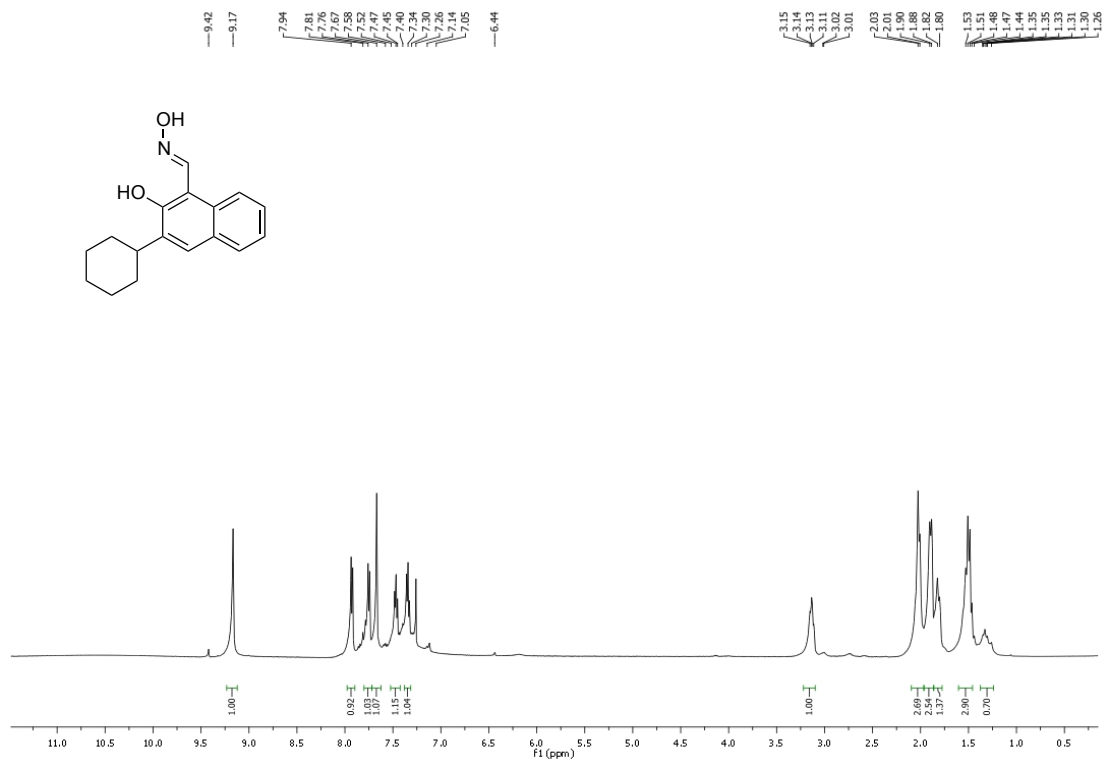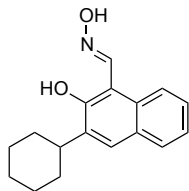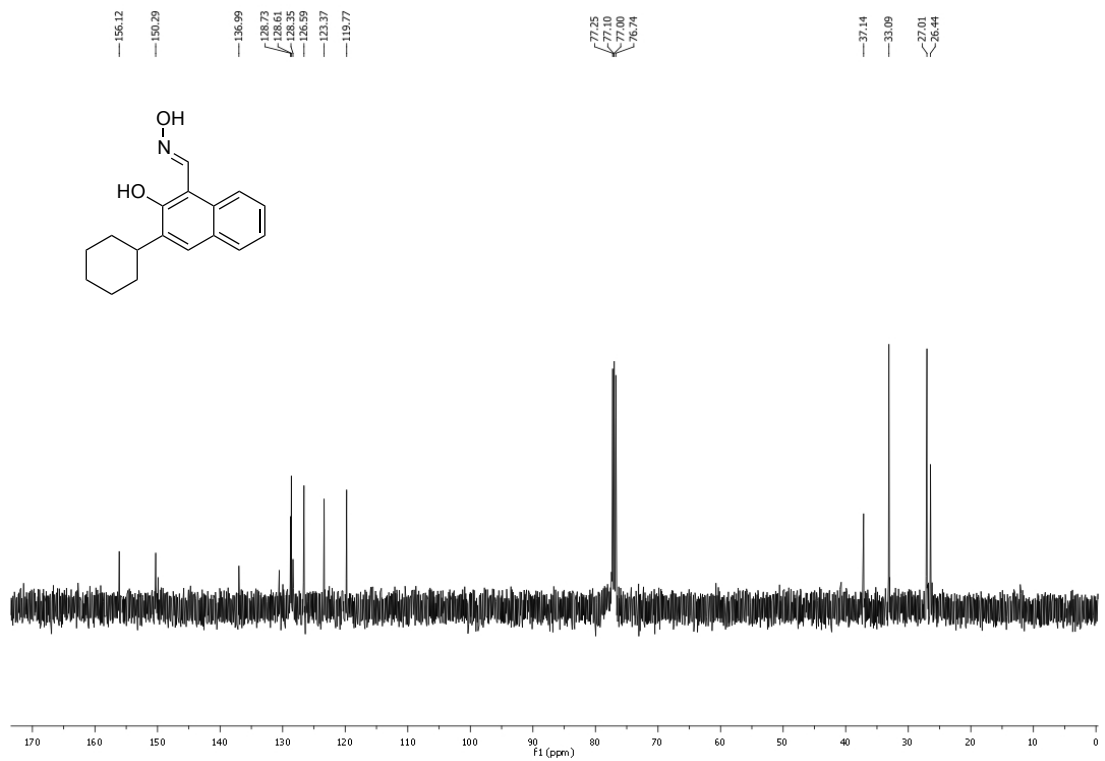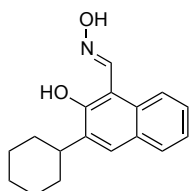

Compound 13d

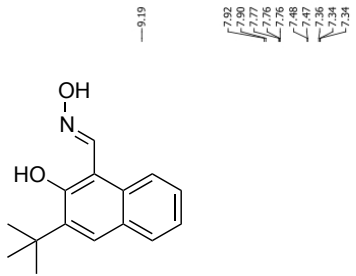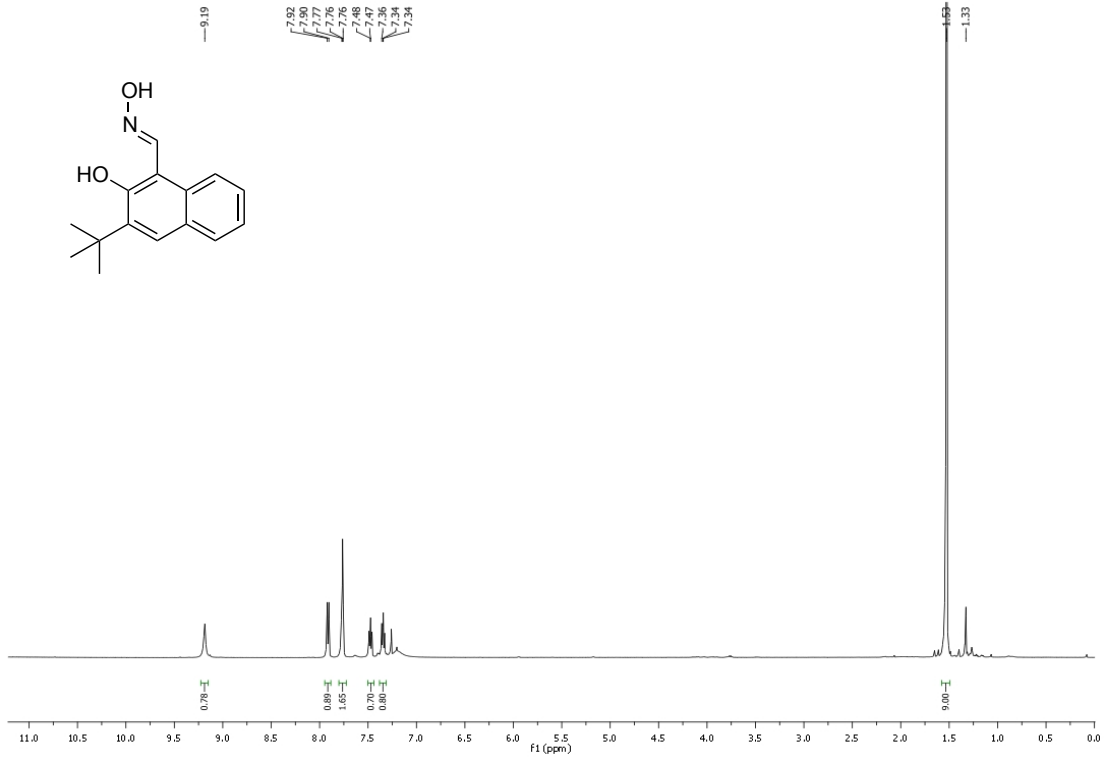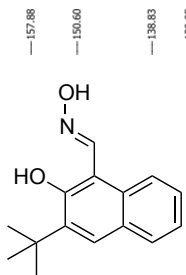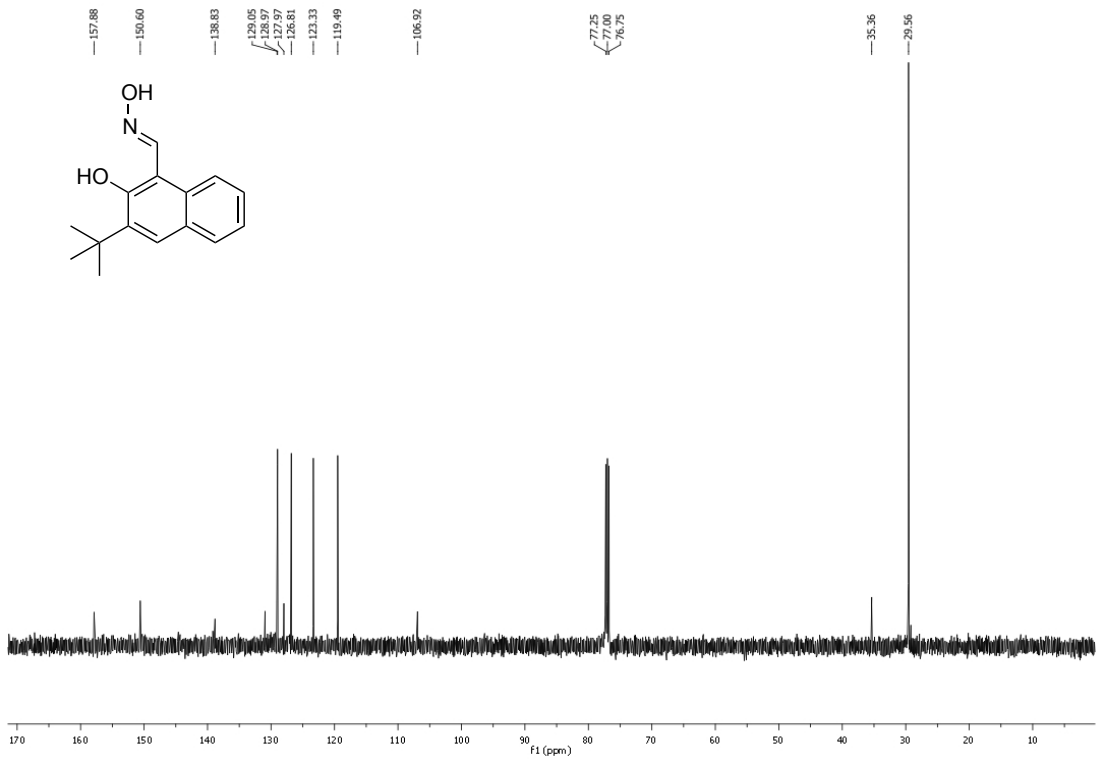

# Compound 13e

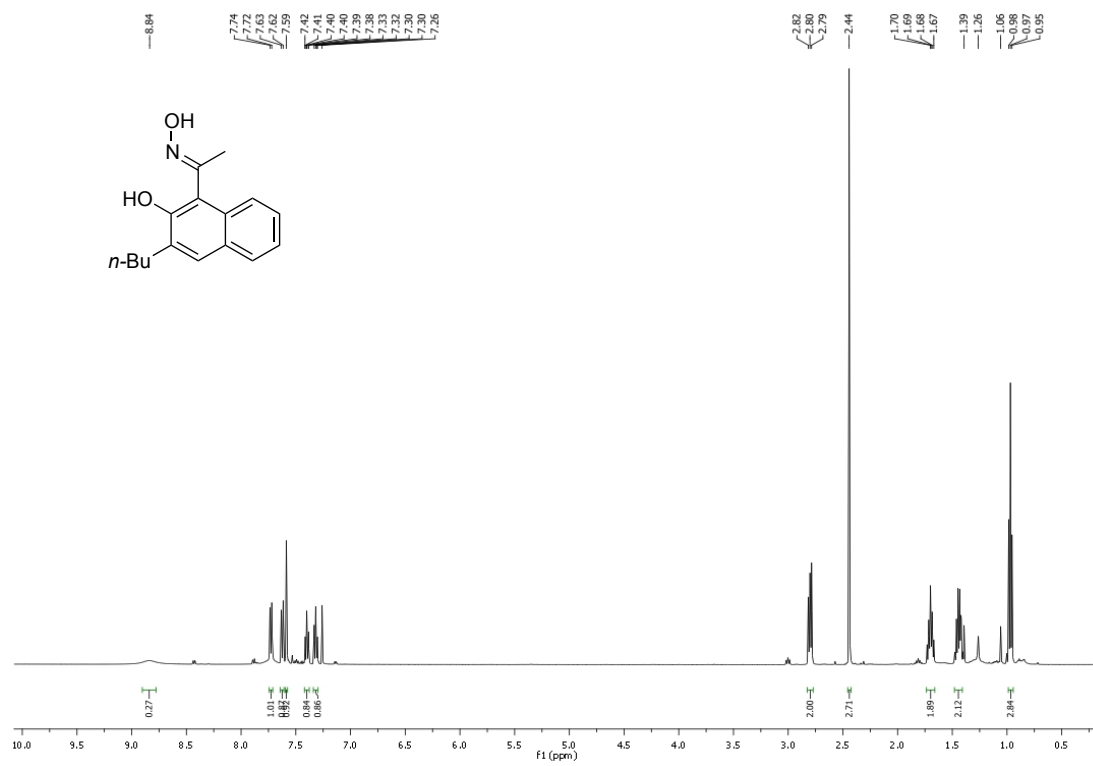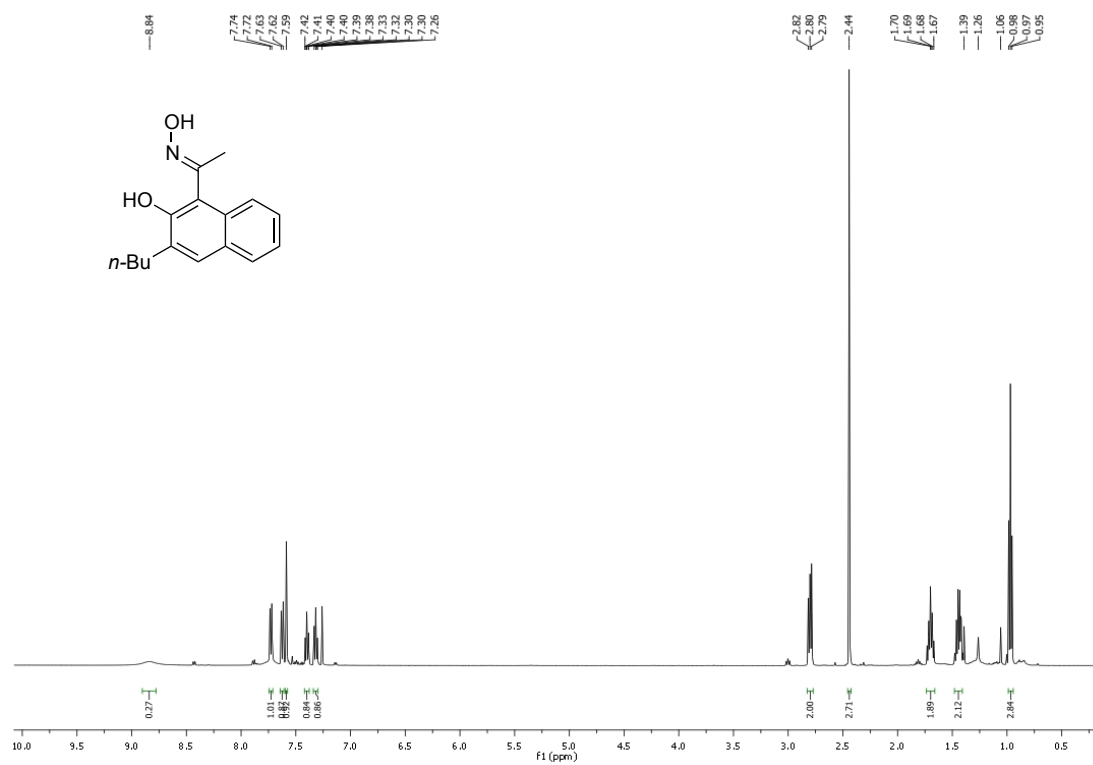



Compound 13f

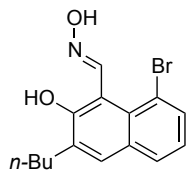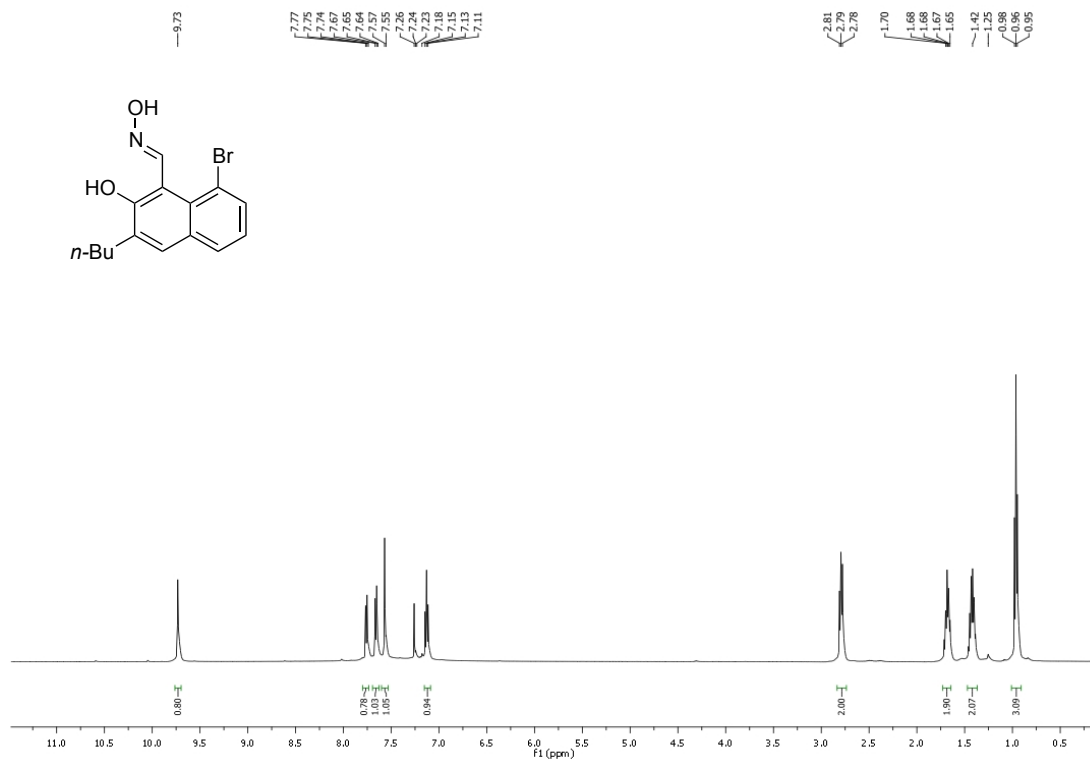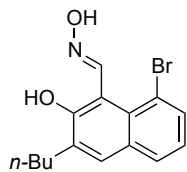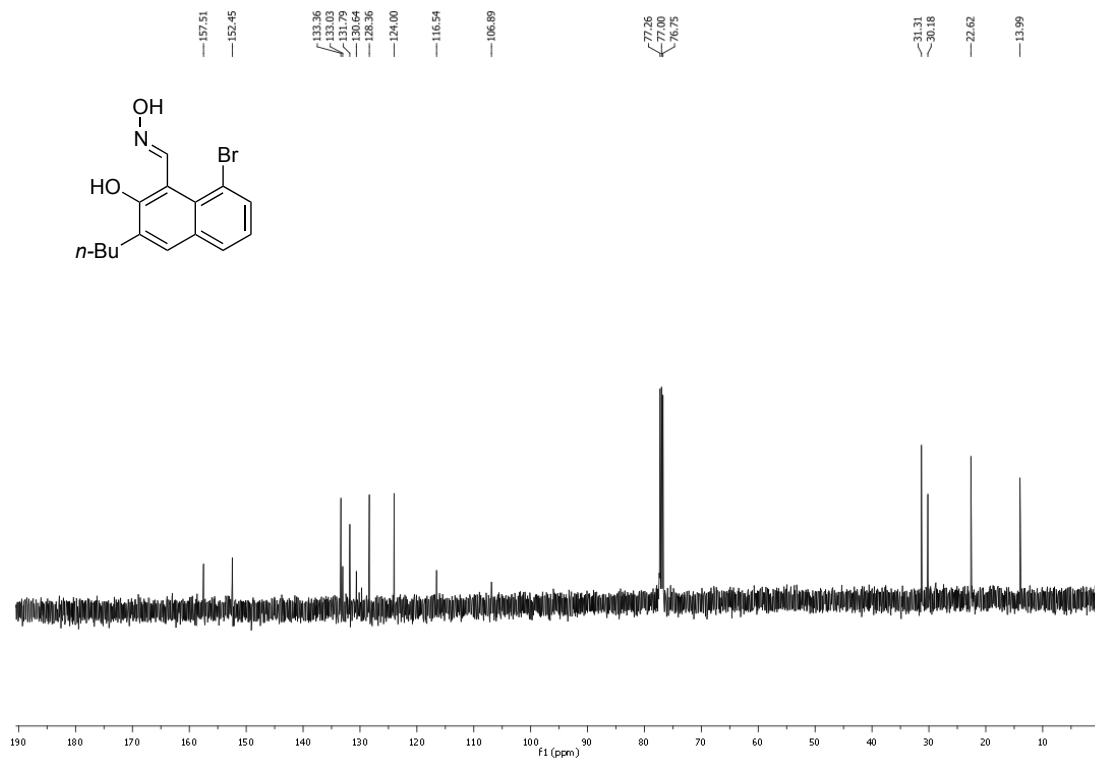

Compound 13g

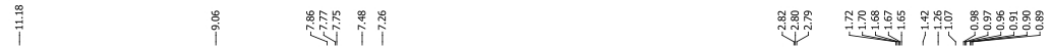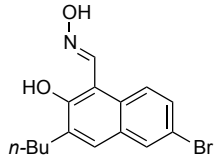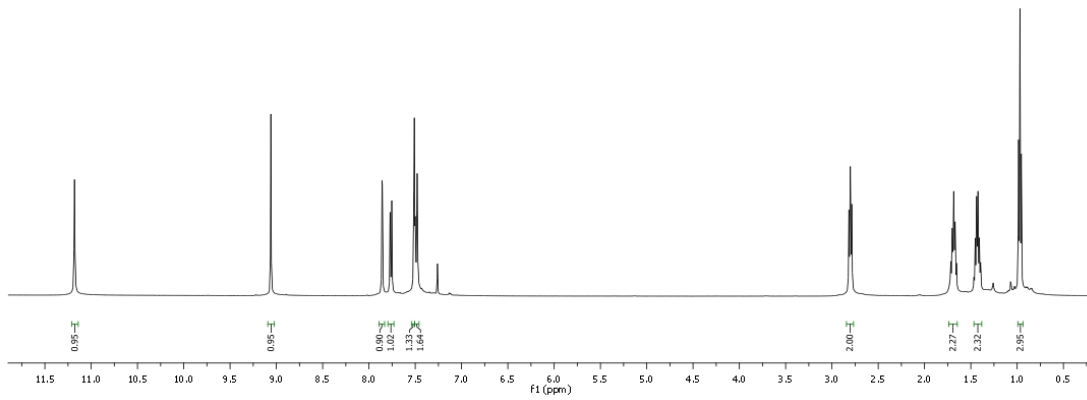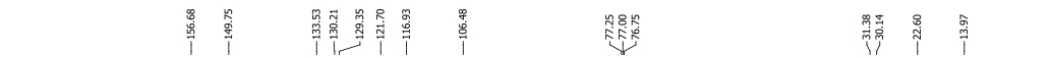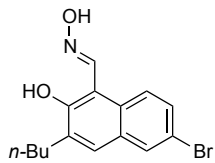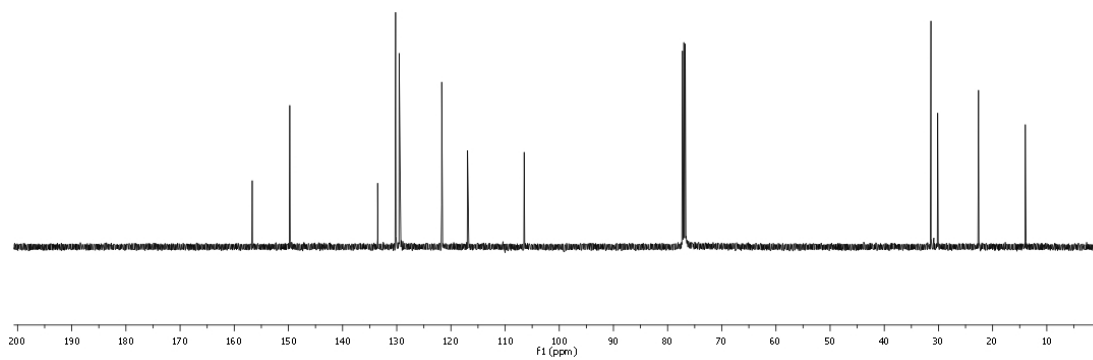

# Compound 13h

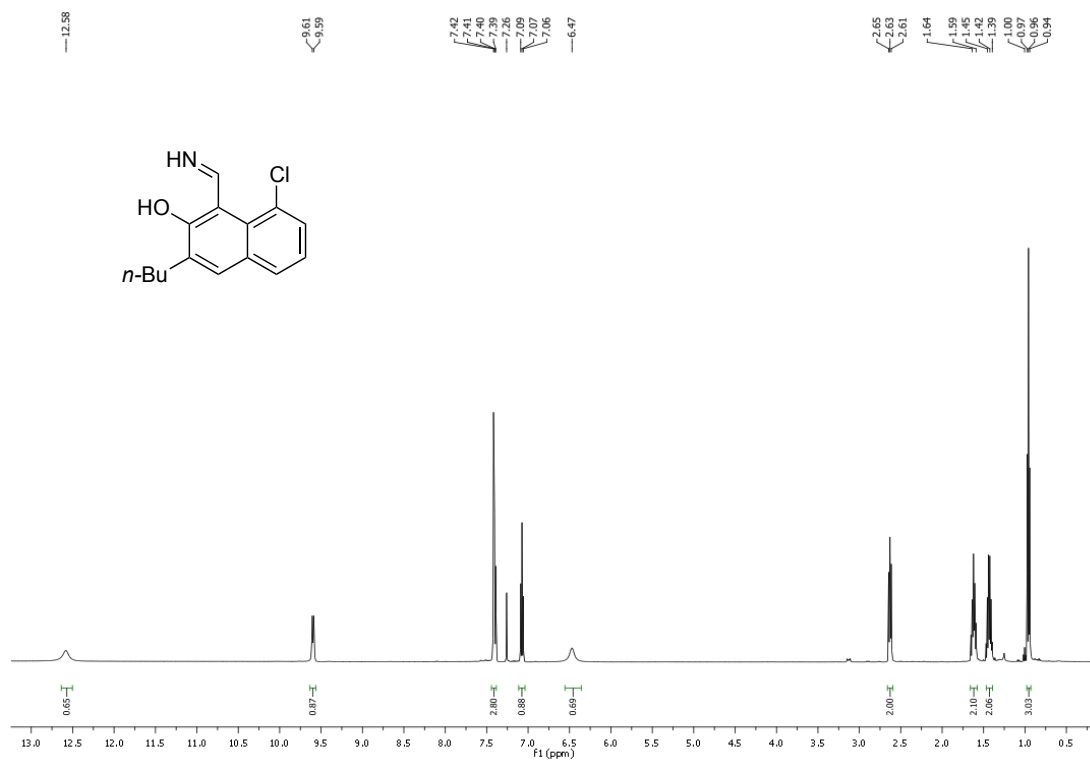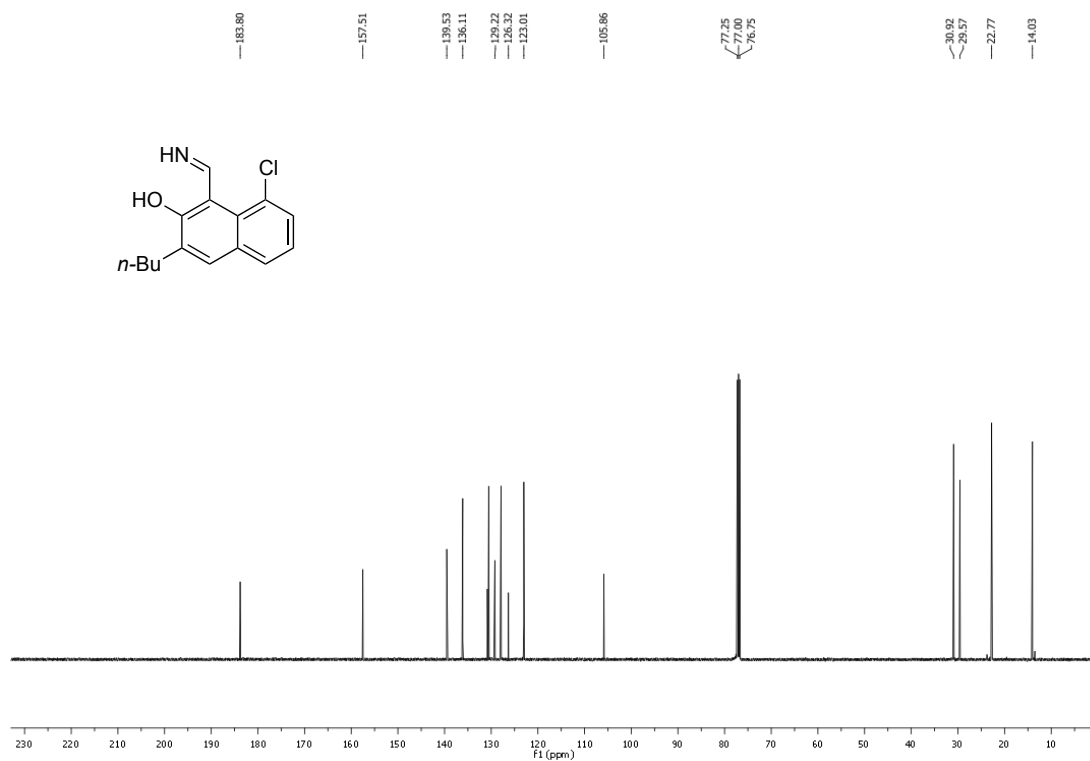

Compound 13i

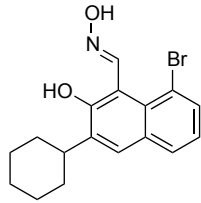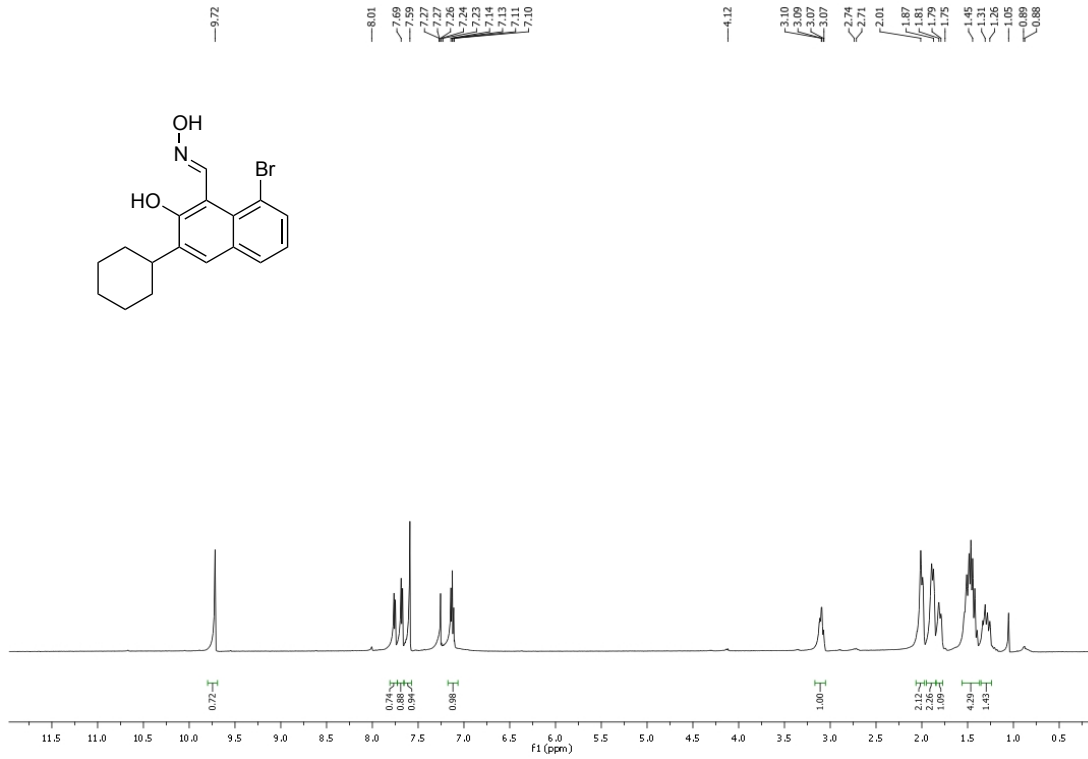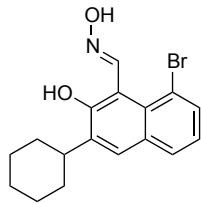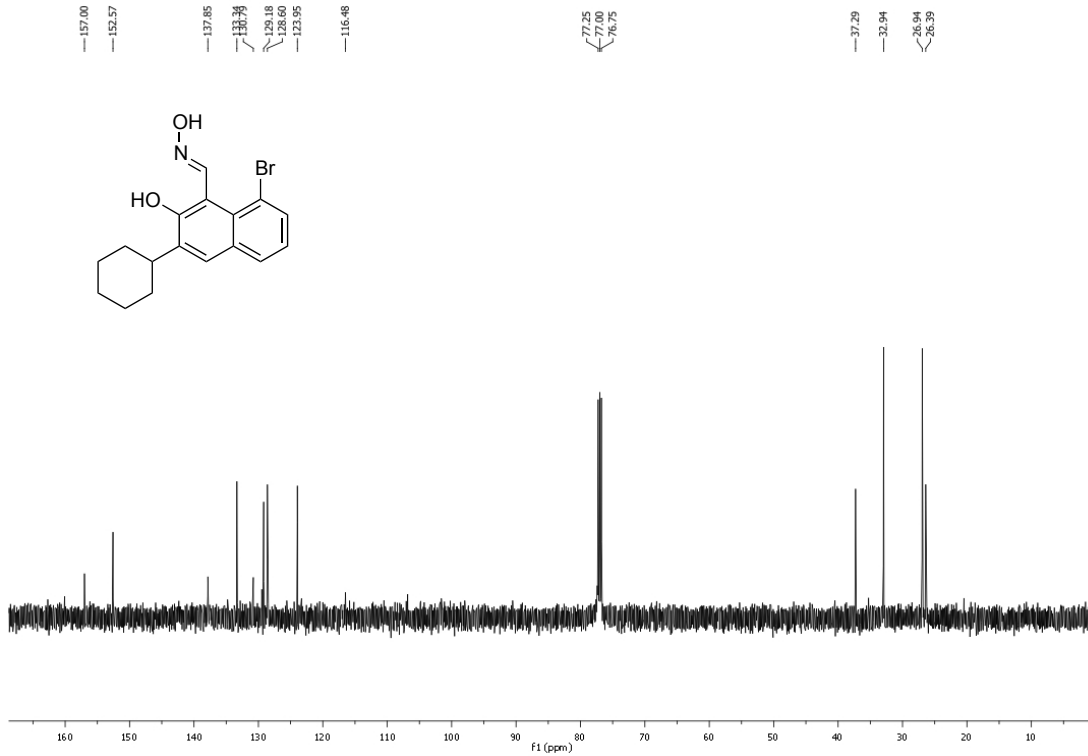

Compound 13j

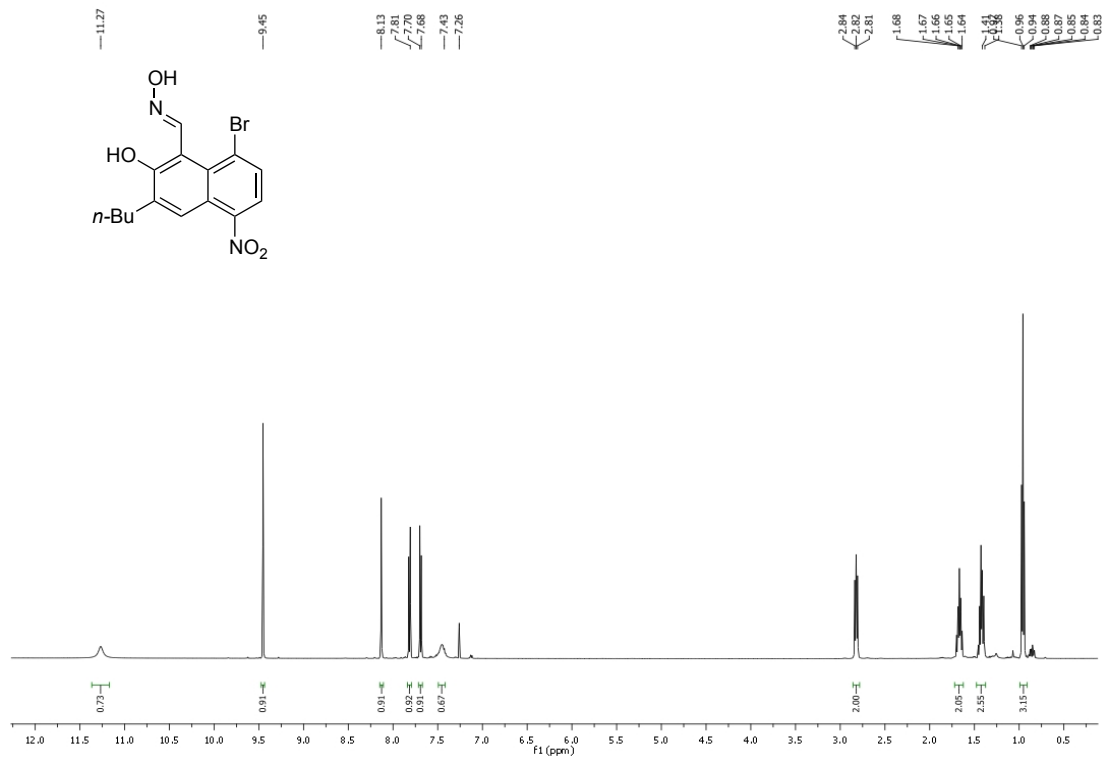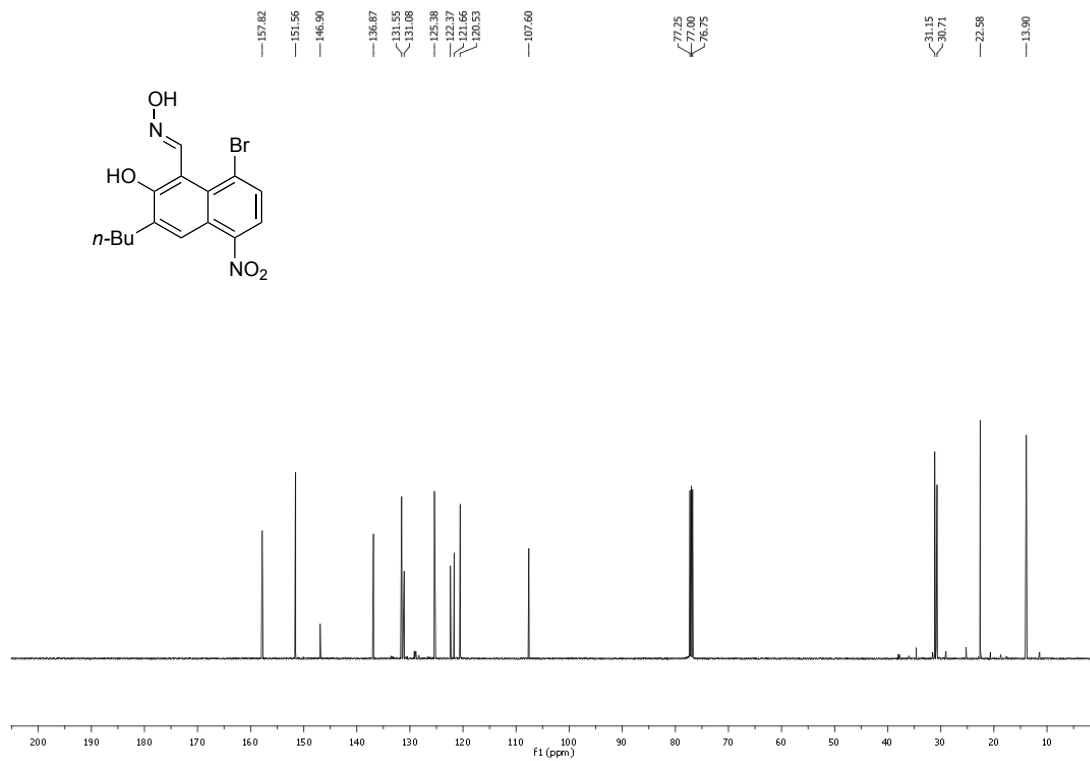

Compound 13k

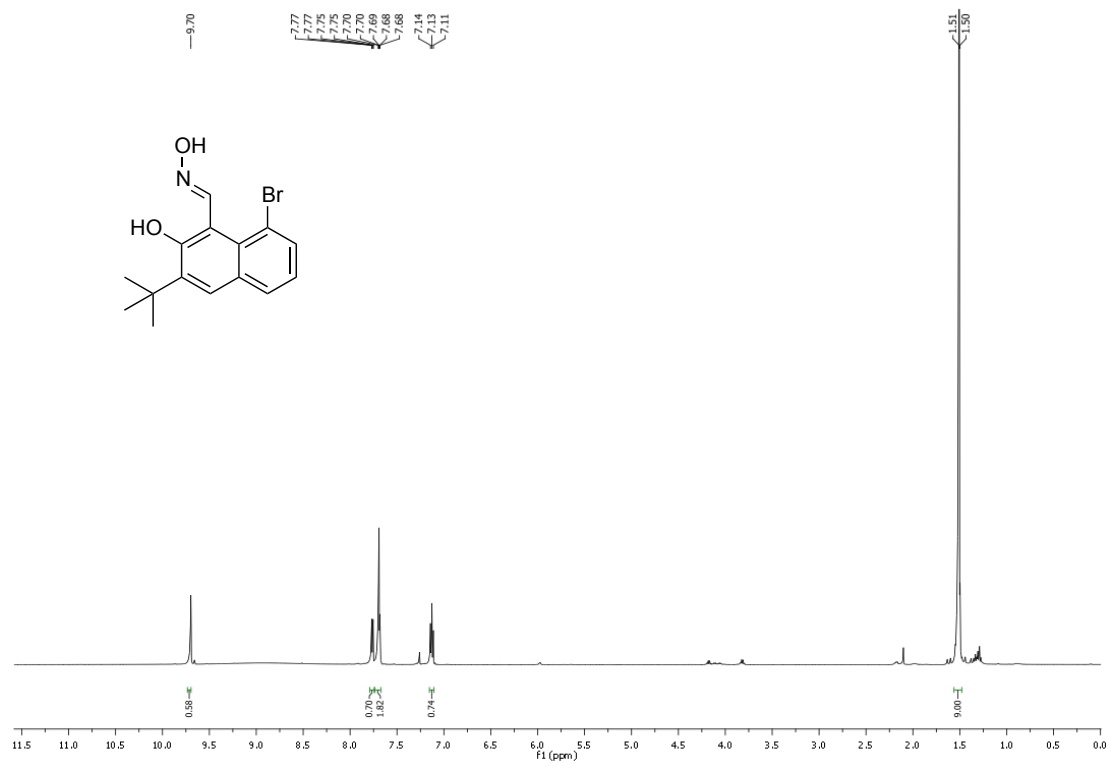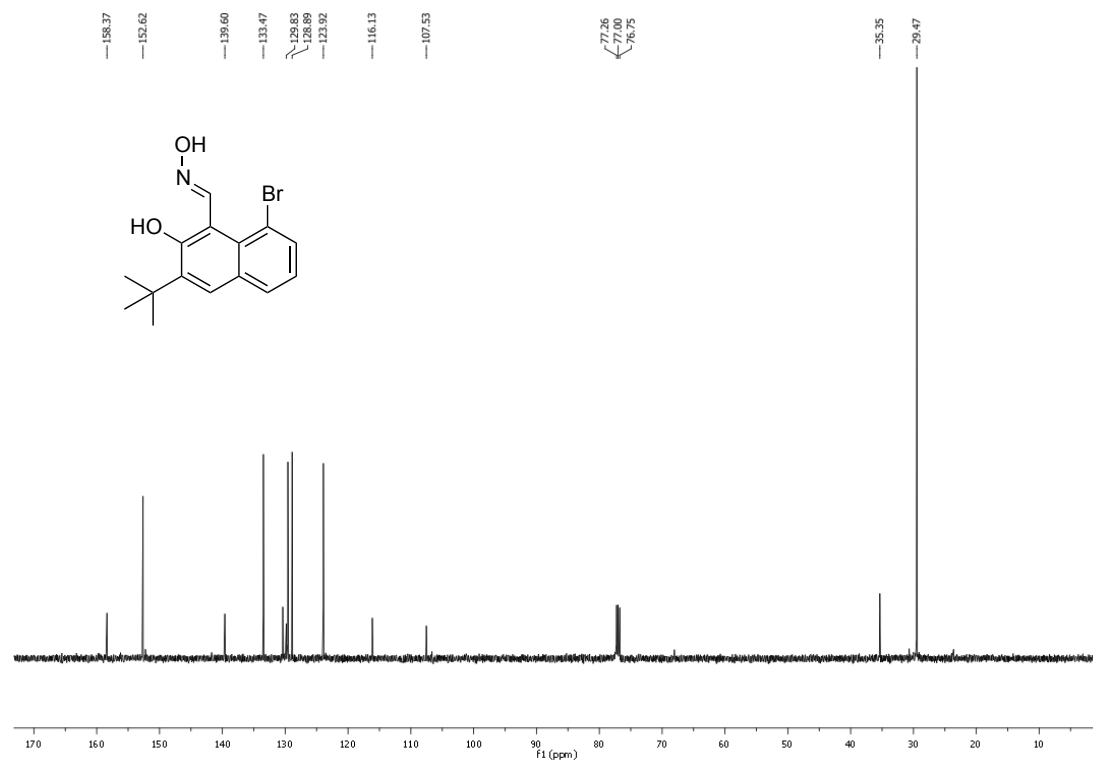

# Compound 13I

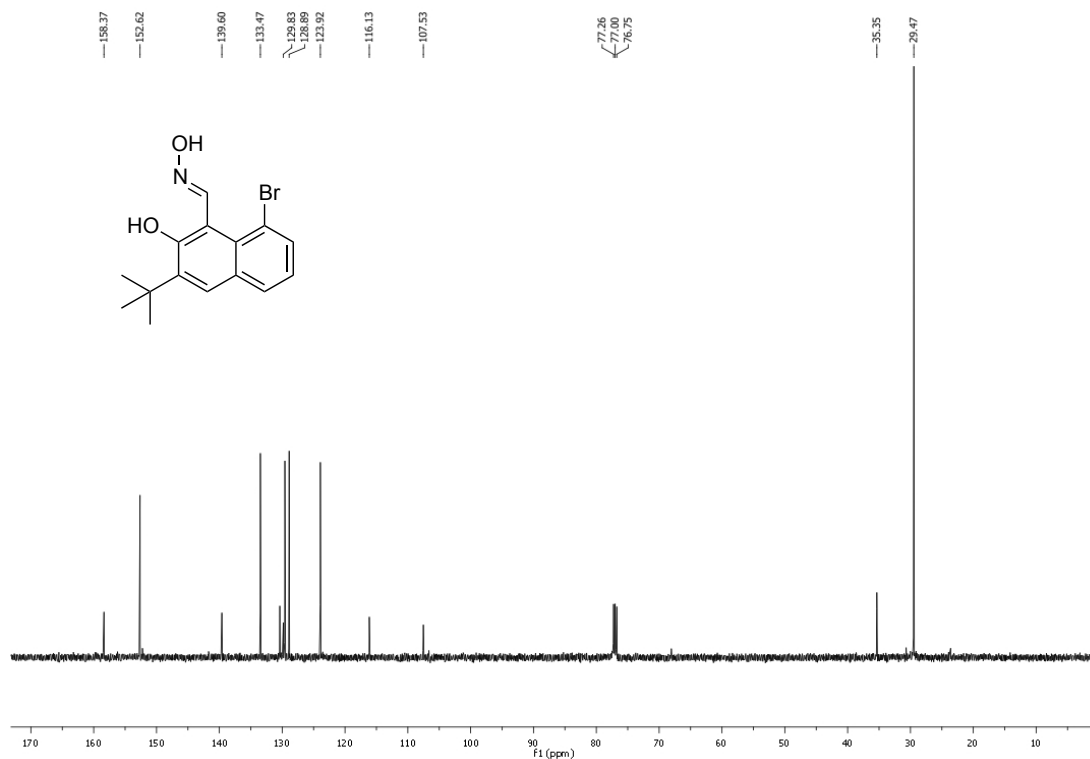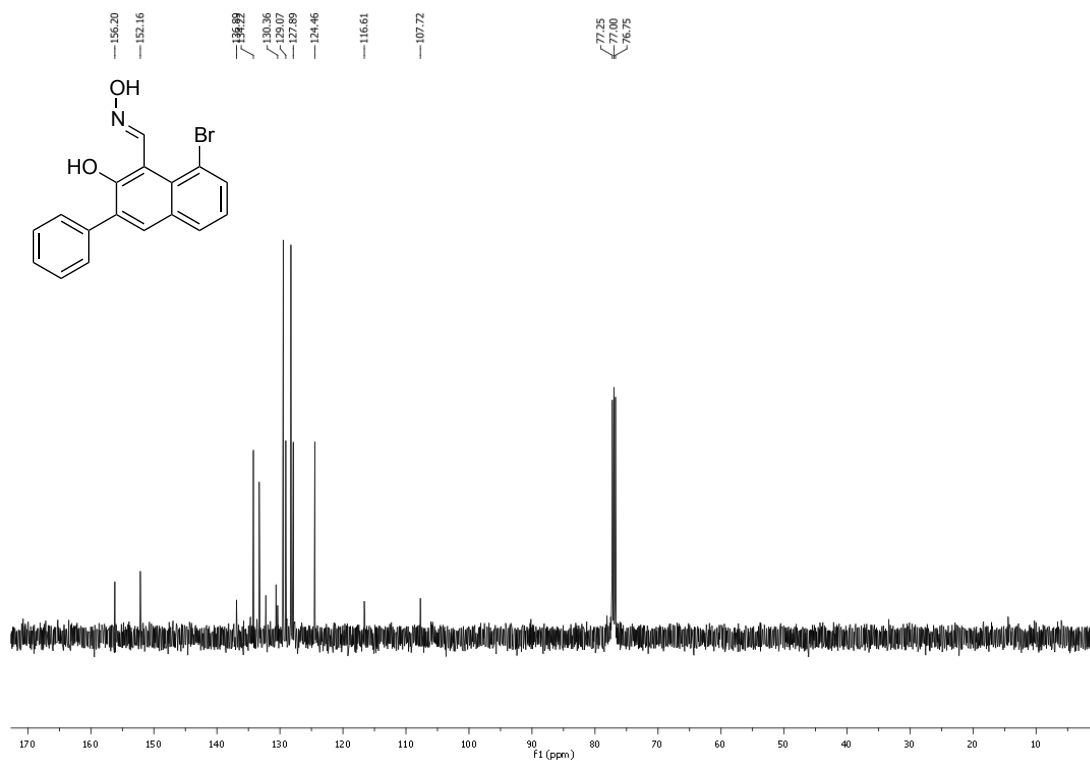

# Compound 14

jc2-154-1-121911

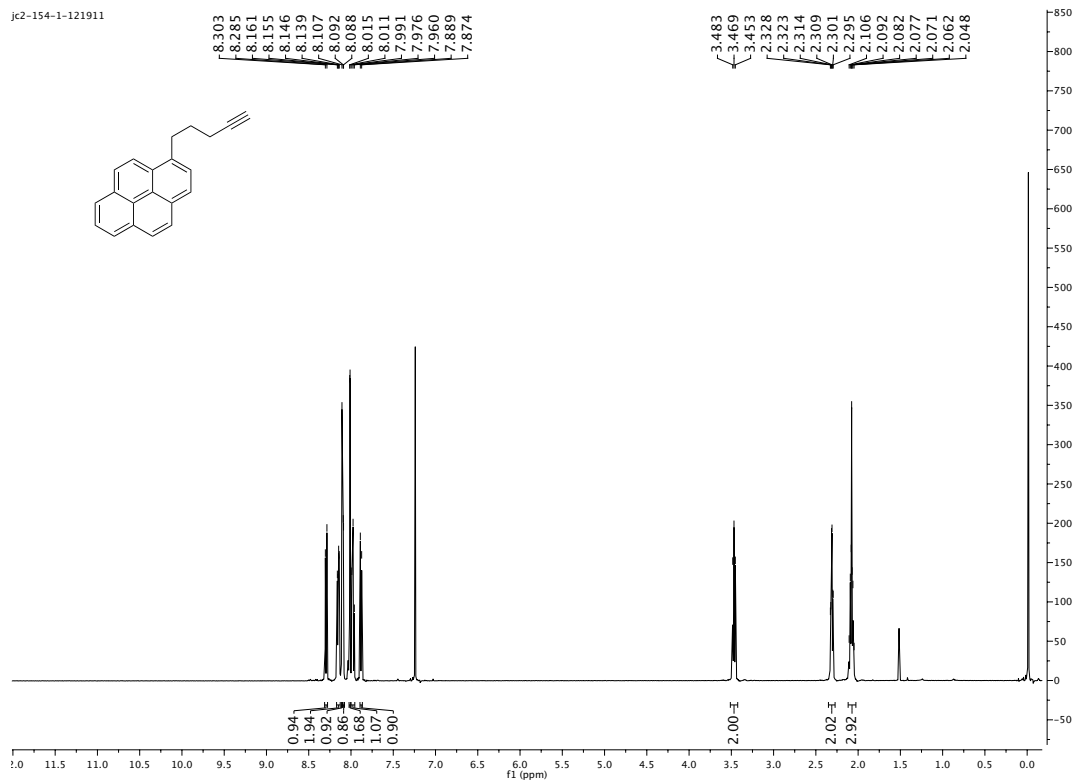

jc1-172-13C-031512

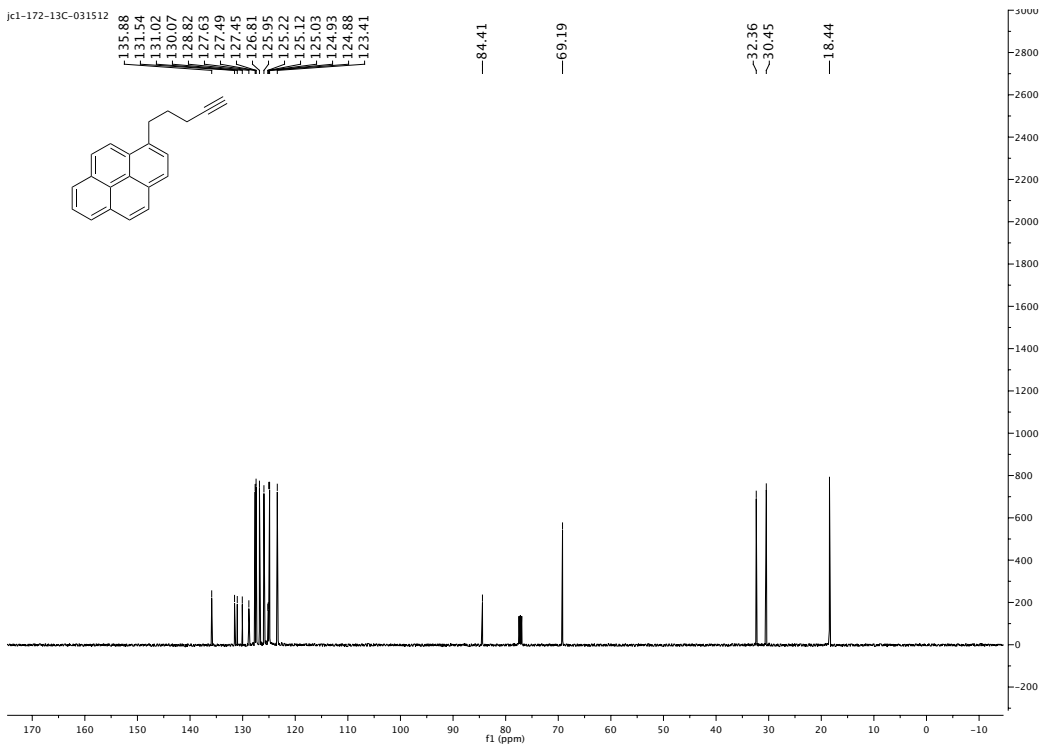



# Compound 15

jc2-219-2-032312

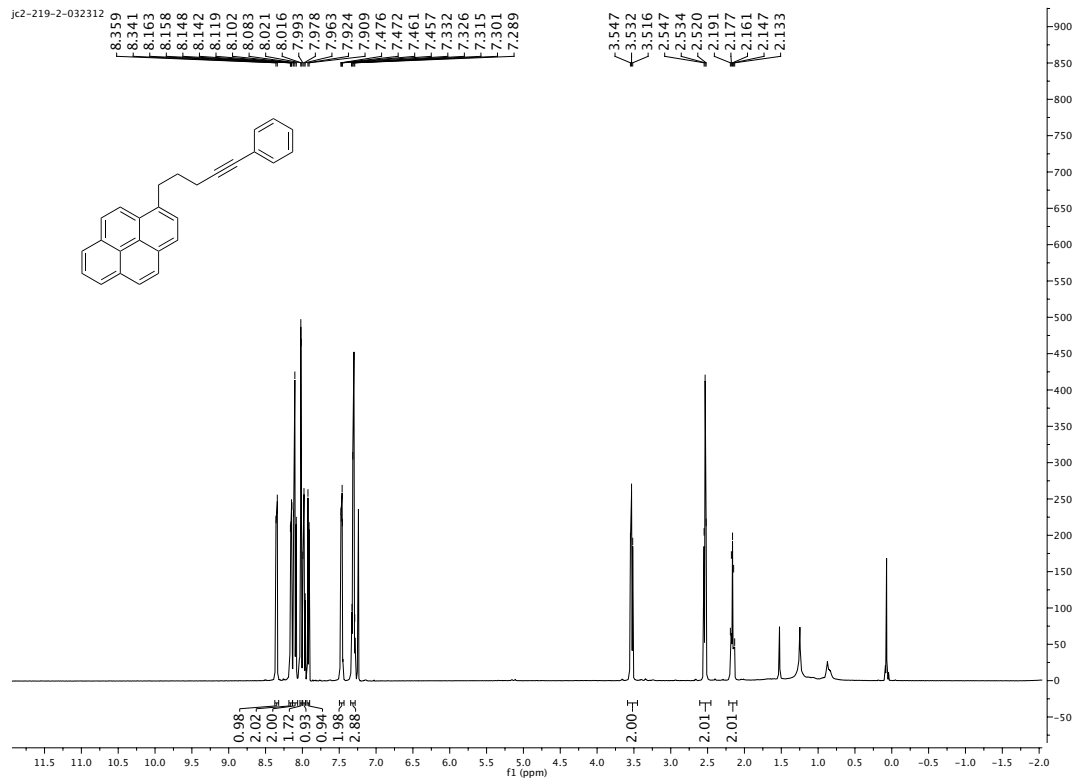

jc2-219-2-13C-03

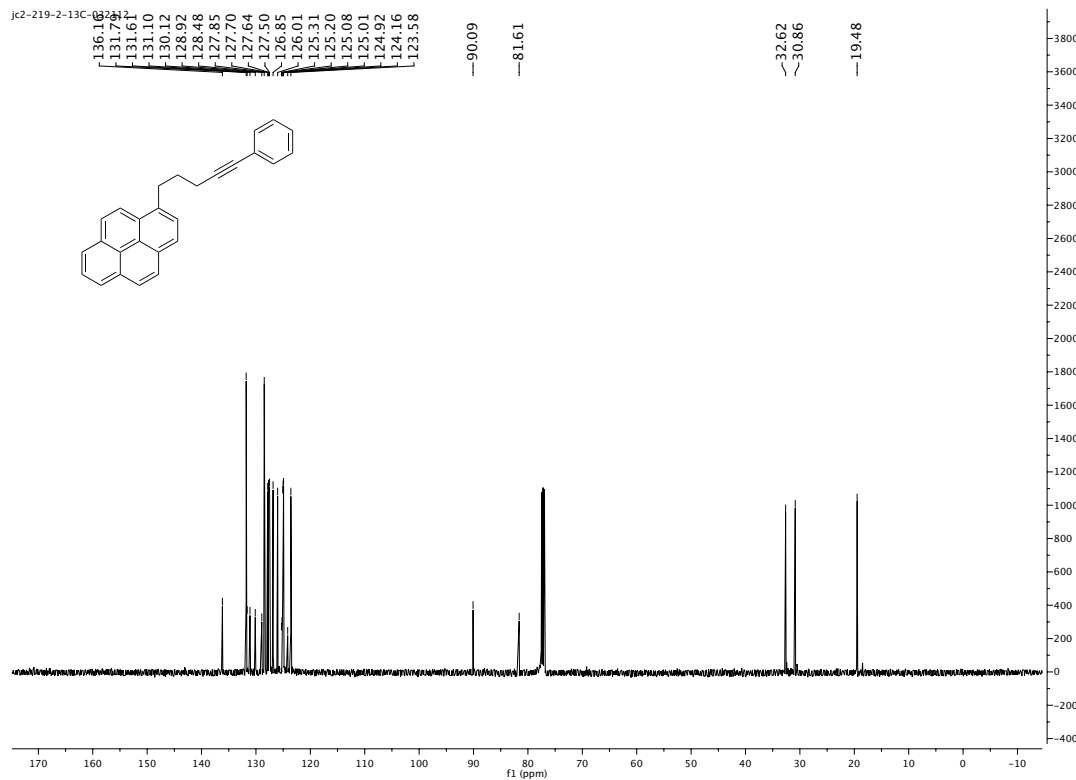

# Compound 16

jc2.263.053012

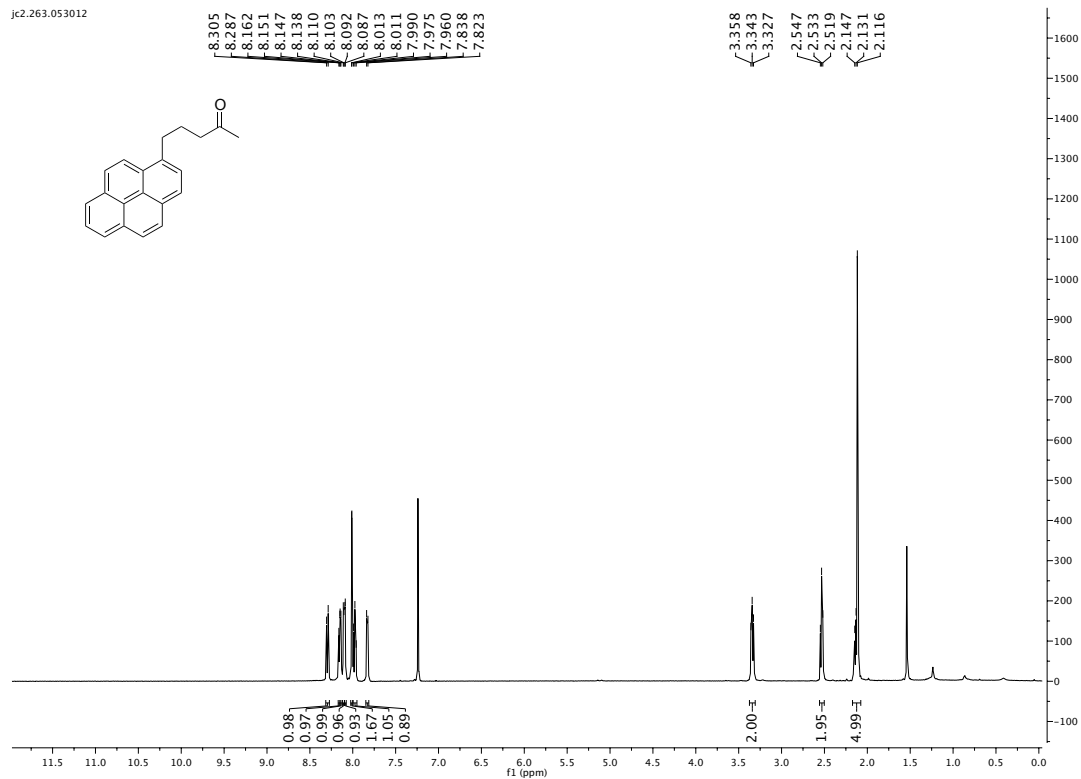

jc2-263-product-13C-042312

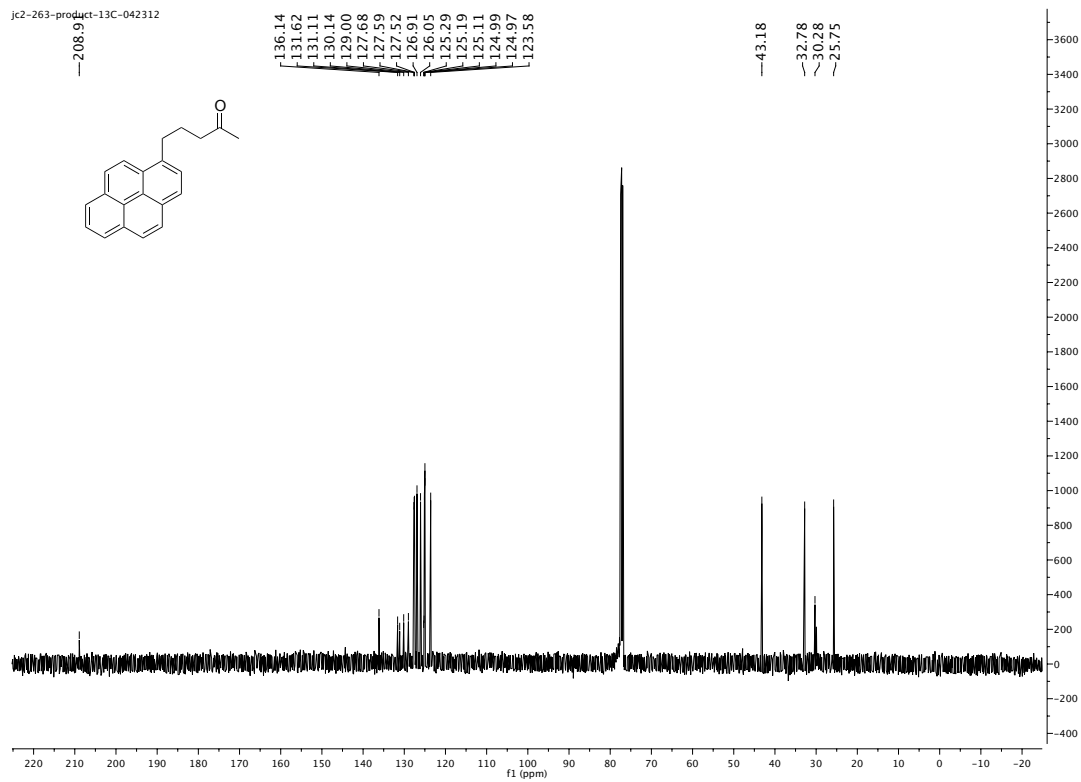

# Compound 17

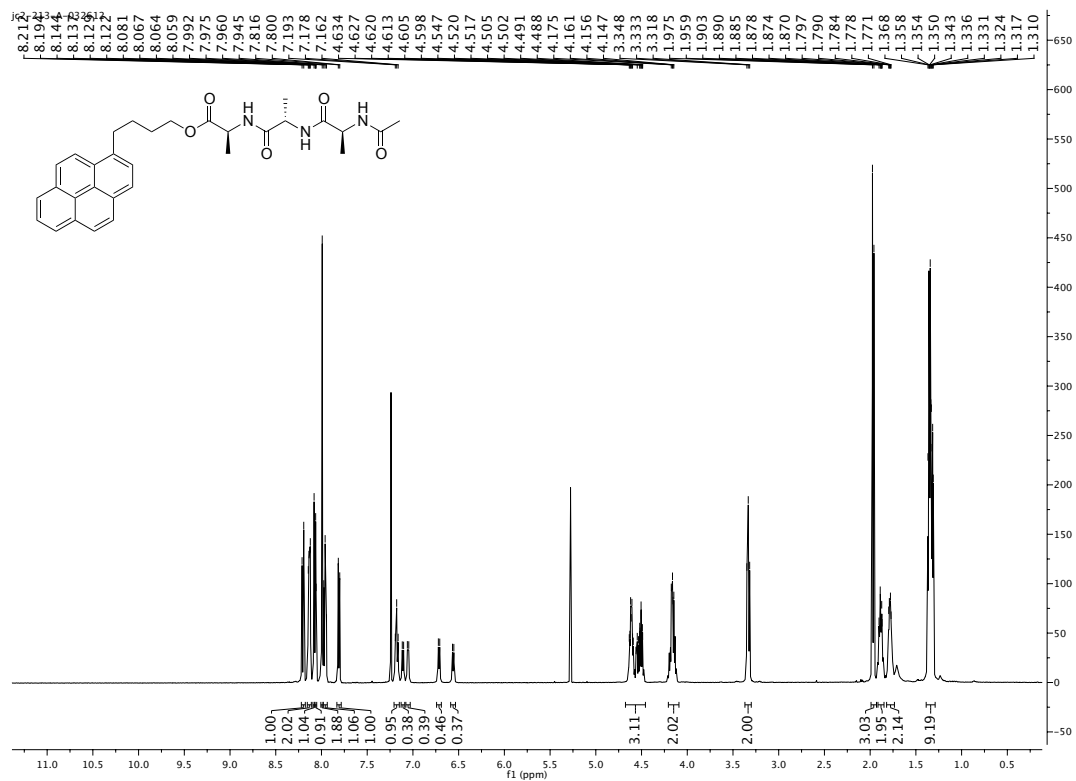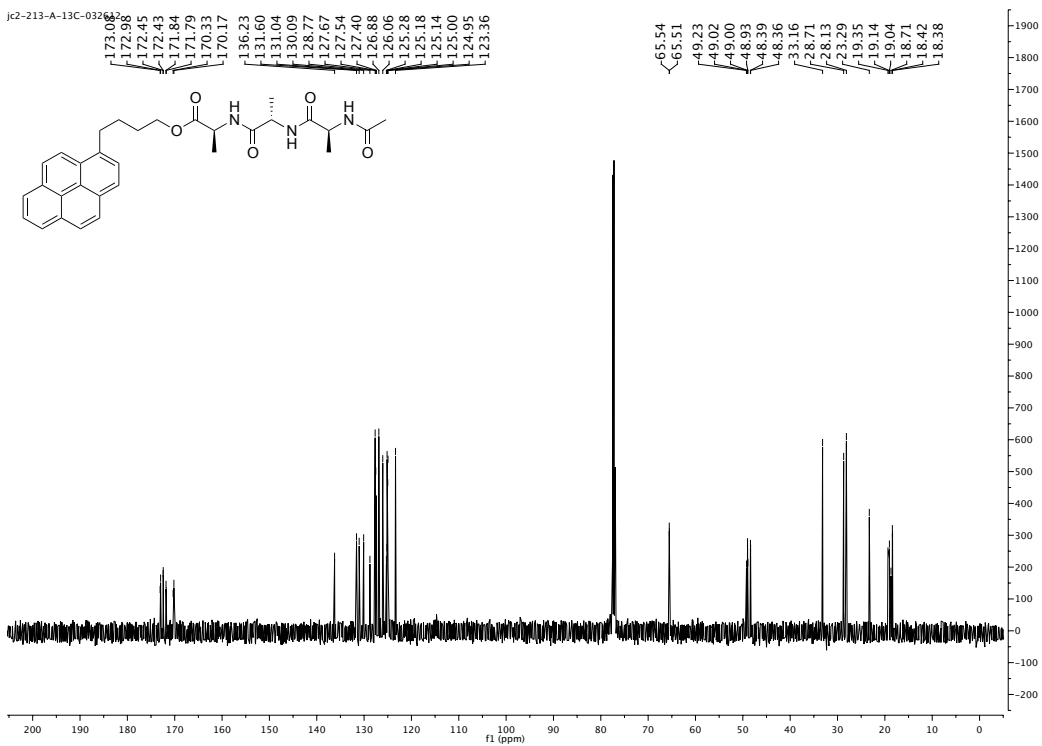

# Compound 18

jc1-188P-031512

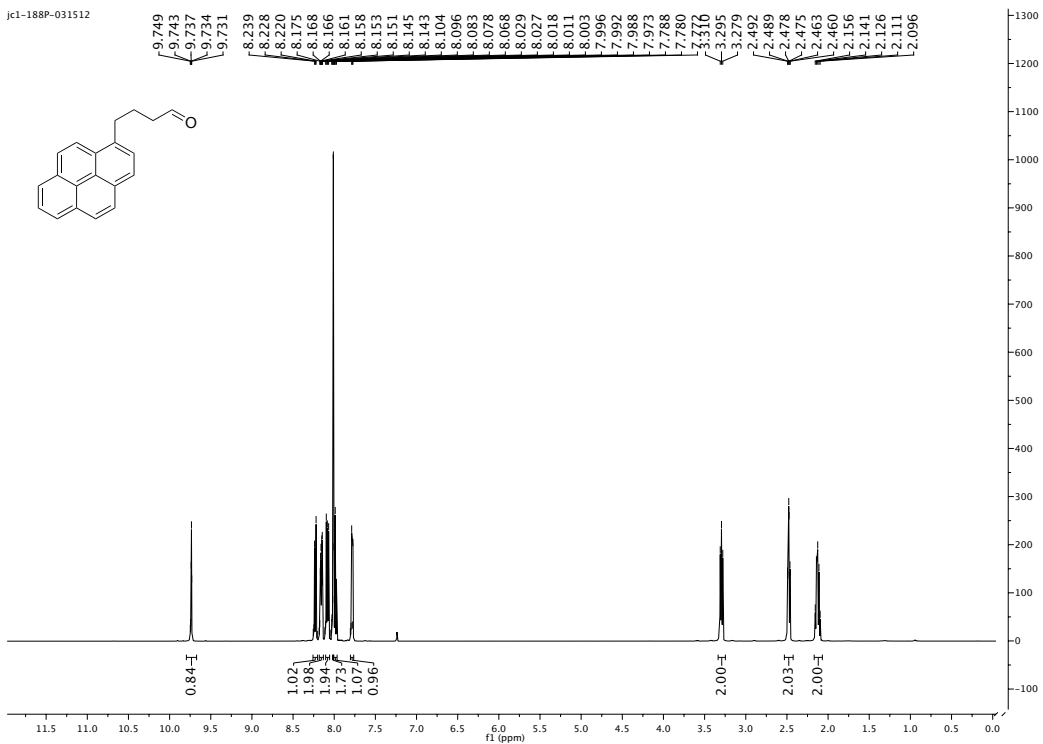

jc1-188P-13C-031512

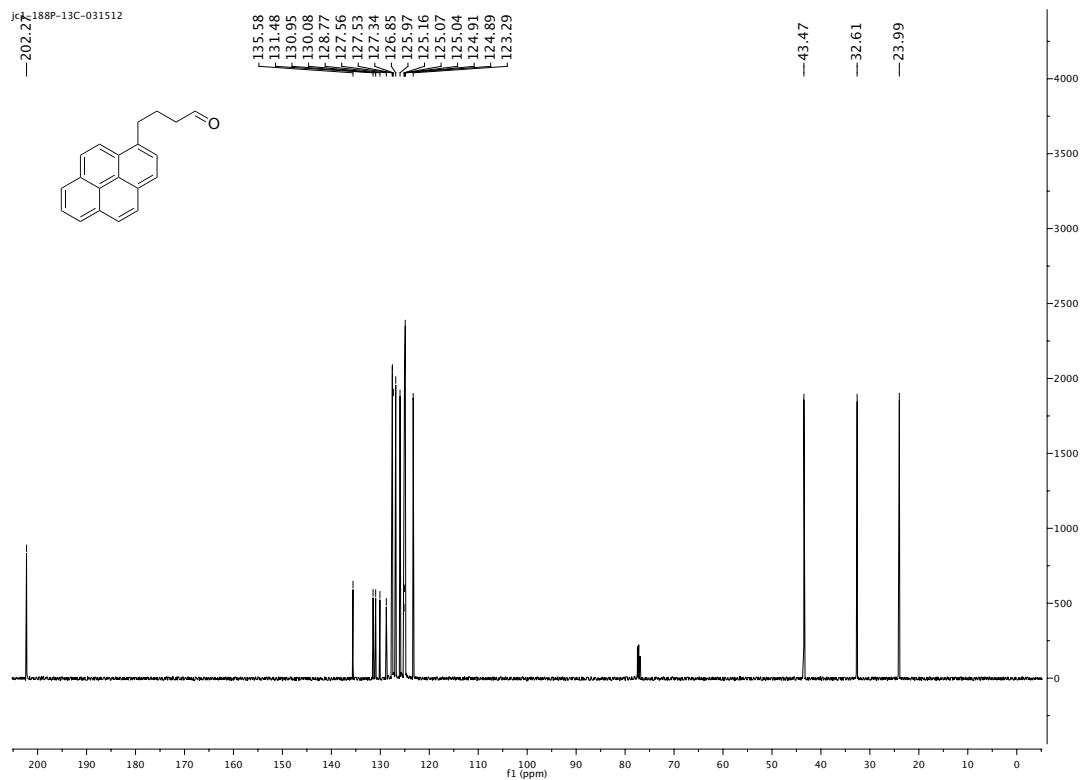

# Compound 20

jc2-257-041812

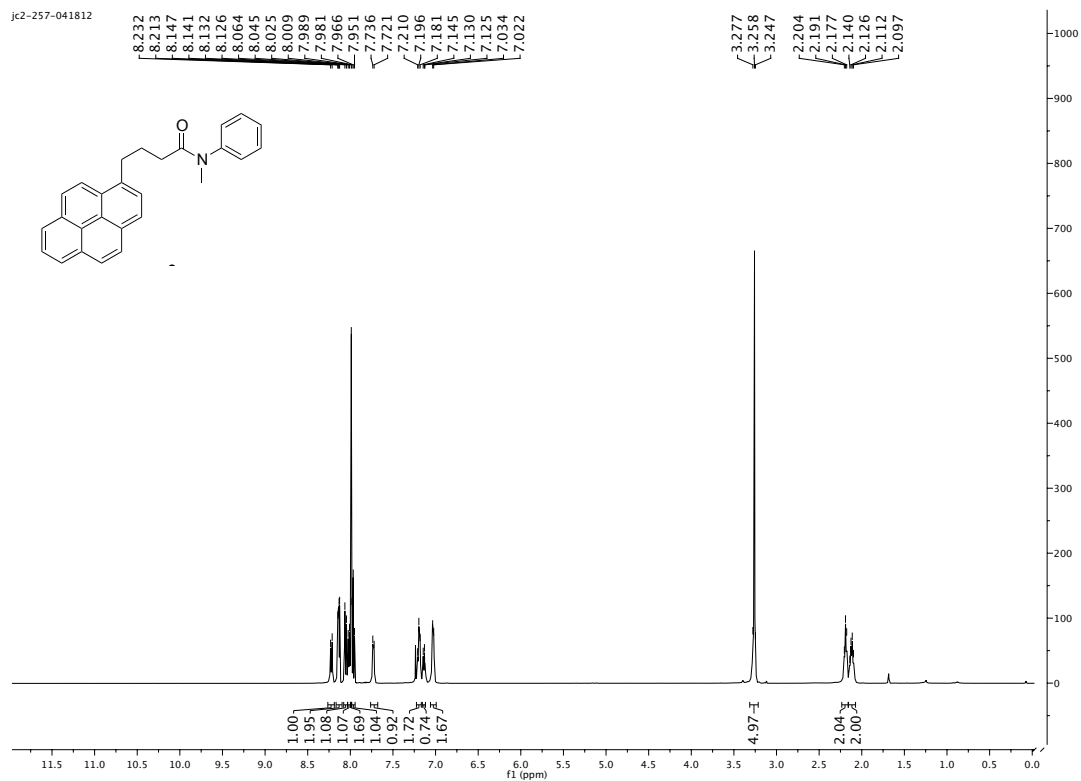

jc2-257-13C-041812

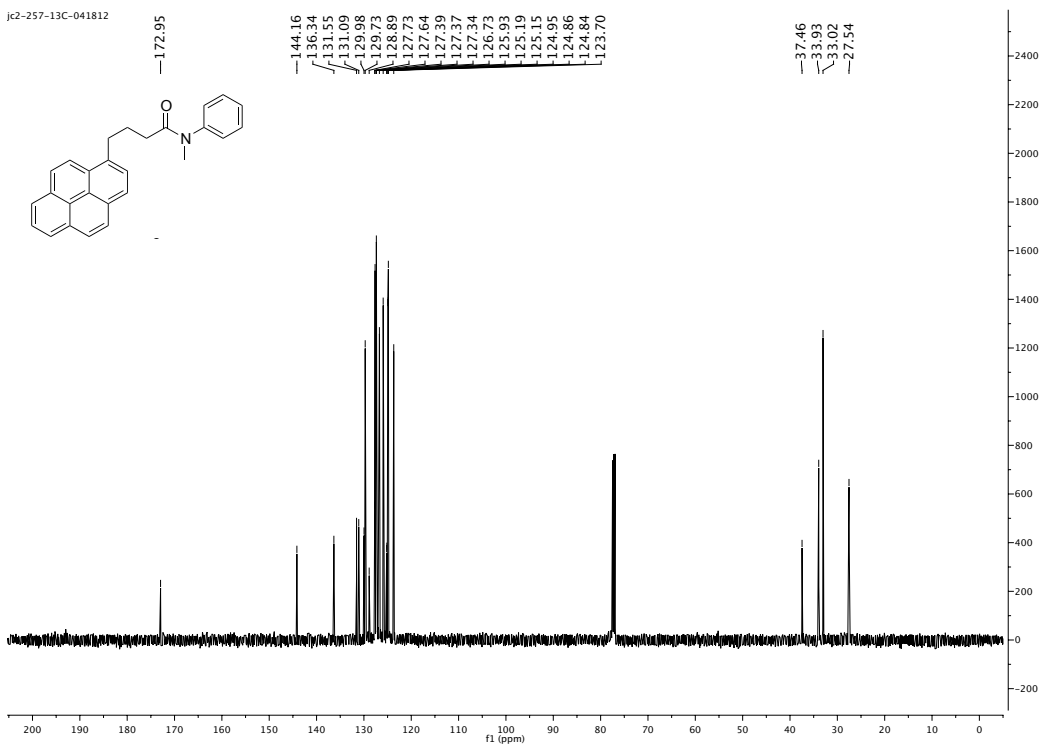

# Compound 22

jc2-184-3-011712

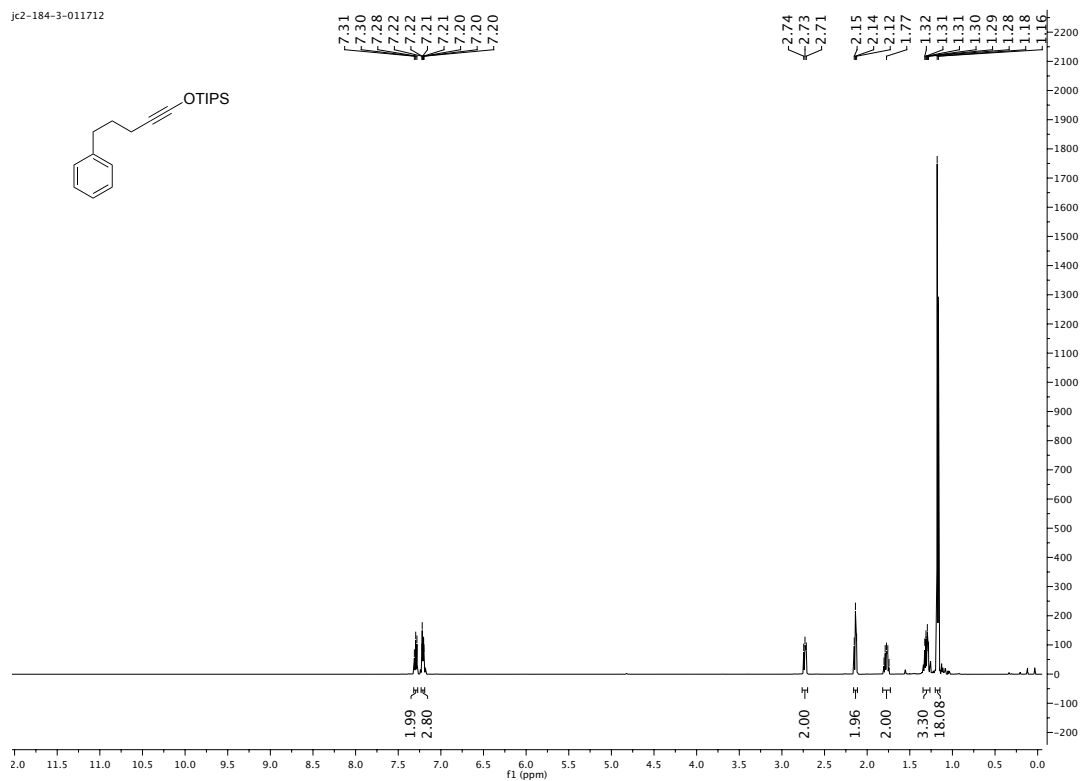

jc2-184-3-13C-011712

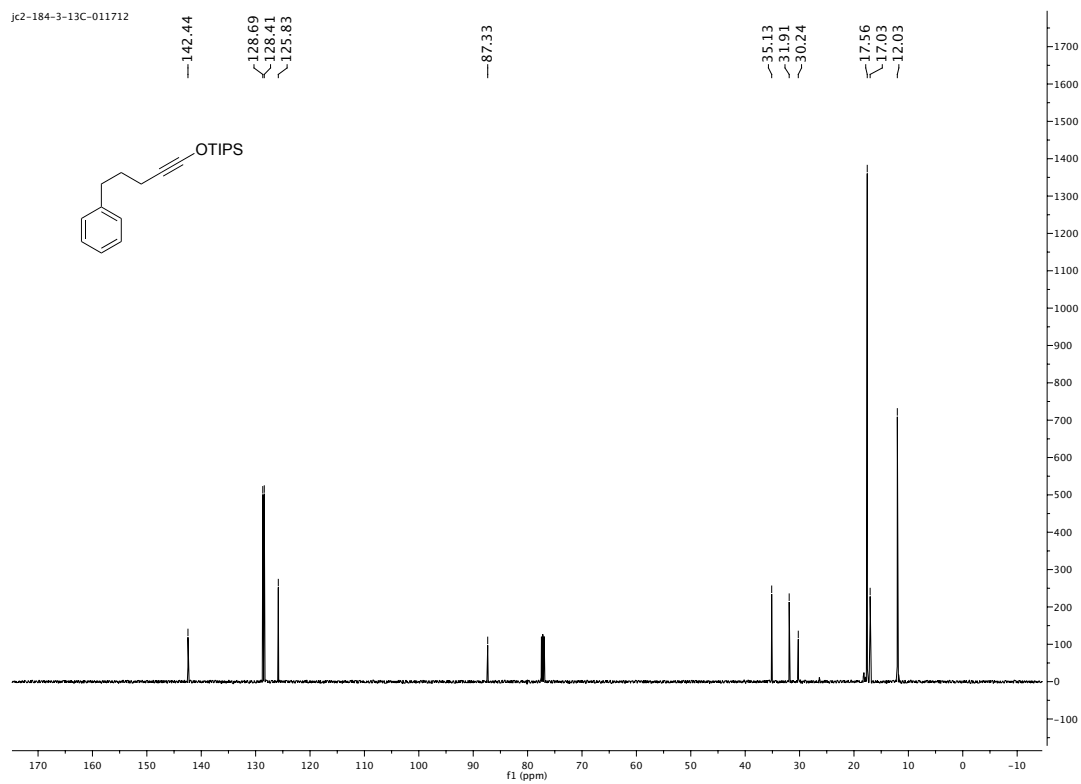

## X-Ray crystal structures

### X-ray Crystal Structures for 10a, 10e, 13a, and 13f

Single crystals suitable for X-ray crystallographic analysis were grown by slow evaporation of a solution of **10a** and **10e** in DCM/hexanes (Supplementary Figure 4), **13a** and **13f** in Hexanes/EtOAc (Supplementary Figure 5). CCDC 895621, 895622, 895726, 895727 contain the supplementary crystallographic data for this paper. These data can be obtained free of charge from The Cambridge Crystallographic Data Centre via [www.ccdc.cam.ac.uk/data\\_request/cif](http://www.ccdc.cam.ac.uk/data_request/cif).

#### Data Collection for 10a

An elongate broken fragment (0.48 x 0.20 x 0.12 mm) was selected under a stereo-microscope while immersed in Fluorolube oil to avoid possible reaction with air. The crystal was removed from the oil using a tapered glass fiber that also served to hold the crystal for data collection. The crystal was mounted and centered on a Bruker SMART APEX system at 100 K. Rotation and still images showed the diffractions to be sharp. Frames separated in reciprocal space were obtained and provided an orientation matrix and initial cell parameters. Final cell parameters were obtained from the full data set.

A "full sphere" data set was obtained which samples approximately all of reciprocal space to a resolution of 0.84 Å using 0.3° steps in using 10 second integration times for each frame. Data collection was made at 100 K. Integration of intensities and refinement of cell parameters were done using SAINT [1]. Absorption corrections were applied using SADABS [1] based on redundant diffractions.

#### Data Collection for 10e

A rod shaped fragment (0.36 x 0.12 x 0.10 mm) was selected under a stereo-microscope while immersed in Fluorolube oil to avoid possible reaction with air. The crystal was removed from the oil using a tapered glass fiber that also served to hold the crystal for data collection. The crystal was mounted and centered on a Bruker SMART APEX system at 100 K. Rotation and still images showed the diffractions to be sharp. Frames separated in reciprocal space were obtained and provided an orientation matrix and initial cell parameters. Final cell parameters were obtained from the full data set.

A "full sphere" data set was obtained which samples approximately all of reciprocal space to a resolution of 1.00 Å using 0.3° steps in using 10 second integration times for each frame. Data collection was made at 100 K. Integration of intensities and refinement of cell parameters were done using SAINT [1]. Absorption corrections were applied using SADABS [1] based on redundant diffractions.

#### Data Collection for 13a

An irregular broken fragment (0.32 x 0.32 x 0.40 mm) was selected under a stereo-microscope while immersed in Fluorolube oil to avoid possible reaction with air. The crystal was removed from the oil using a tapered glass fiber that also served to hold the crystal for data collection. The crystal was mounted and centered on a Bruker SMART APEX system at 100 K. Rotation and still images showed the diffractions to be sharp. Frames separated in reciprocal space were obtained and provided an orientation matrix and initial cell parameters. Final cell parameters were obtained from the full data set.

A "full sphere" data set was obtained which samples approximately all of reciprocal space to a resolution of 0.84 Å using 0.3° steps in  $\omega$  using 10 second integration times for each frame. Data collection was made at 100 K. Integration of intensities and refinement of cell parameters were done using SAINT [1]. Absorption corrections were applied using SADABS [1] based on redundant diffractions.

### Data Collection for 13f

An irregular rod-shaped fragment (0.48 x 0.20 x 0.16 mm) was selected under a stereo-microscope while immersed in Fluorolube oil to avoid possible reaction with air. The crystal was removed from the oil using a tapered glass fiber that also served to hold the crystal for data collection. The crystal was mounted and centered on a Bruker SMART APEX system at 100 K. Rotation and still images showed the diffractions to be sharp. Frames separated in reciprocal space were obtained and provided an orientation matrix and initial cell parameters. Final cell parameters were obtained from the full data set.

A “full sphere” data set was obtained which samples approximately all of reciprocal space to a resolution of 0.75 Å using 0.3° steps in  $\omega$  using 10 second integration times for each frame. Data collection was made at 100 K. Integration of intensities and refinement of cell parameters were done using SAINT [1]. Absorption corrections were applied using SADABS [1] based on redundant diffractions.

### Structure solution and refinement for 10a, 10e, and 13a

The space group was determined as P2<sub>1</sub>/c based on systematic absences and intensity statistics. Direct methods were used to locate most C atoms from the E-map. Repeated difference Fourier maps allowed recognition of all expected C and O atoms. Following anisotropic refinement of the non-H atoms, ideal H atom positions were calculated. Final refinement was anisotropic for O and C and isotropic riding for H atoms. No anomalous bond lengths or thermal parameters were noted. All ORTEP diagrams have been drawn with 50% probability ellipsoids.

### Structure solution and refinement for 13f

The space group was determined as P1( $\bar{1}$ ) based on systematic absences and intensity statistics. Direct methods were used to locate the Br and most C atoms from the E-map. Repeated difference Fourier maps allowed recognition of all expected C, N and O atoms. Following anisotropic refinement of all non-H atoms, ideal H atom positions were calculated. Final refinement was anisotropic for all non-H atoms and isotropic riding for H atoms. No anomalous bond lengths or thermal parameters were noted. All ORTEP diagrams have been drawn with 50% probability ellipsoids.

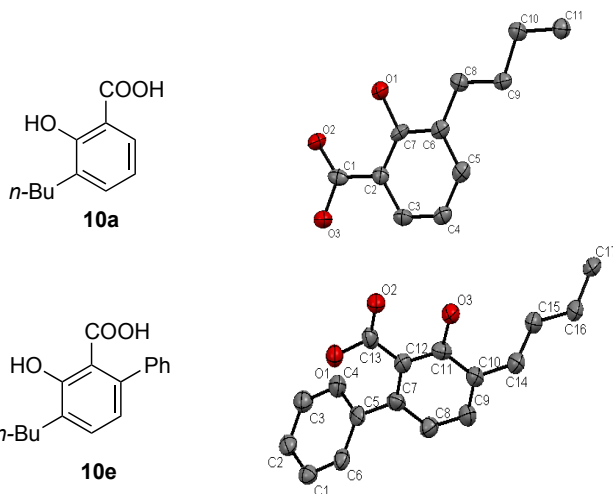

Supplementary Figure S4. X-ray Crystal Structure of 10a and 10e.



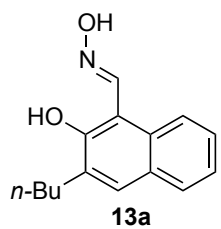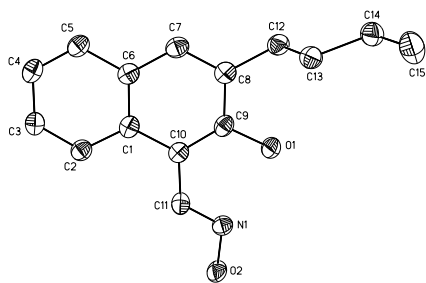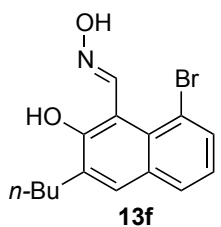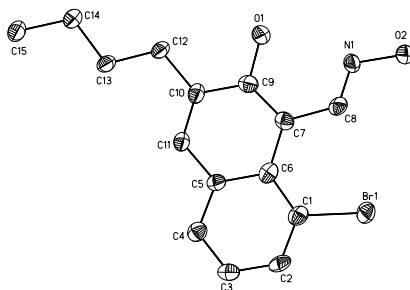

**Supplementary Figure S5. X-ray Crystal Structure of 13a and 13f.**

**Supplementary Table S3. Crystal and structure refinement for 10a.**

|                      |                   |                         |
|----------------------|-------------------|-------------------------|
| Identification Code  | <b>13a</b>        |                         |
| Empirical formula    | $C_{11}H_{14}O_3$ |                         |
| Formula weight       | 194.22            |                         |
| Temperature          | 100 K             |                         |
| Wavelength           | 0.71073 Å         |                         |
| Crystal system       | Monoclinic        |                         |
| Space Group          | $P2_1/c$          |                         |
| Unit cell dimensions | $a = 6.845(4)$ Å  | $a = 90.0^\circ$        |
|                      | $b = 14.765(9)$ Å | $b = 108.061(11)^\circ$ |

|                                              |                                                                                                        |                  |
|----------------------------------------------|--------------------------------------------------------------------------------------------------------|------------------|
|                                              | $c = 9.899(6) \text{ \AA}$                                                                             | $g = 90.0^\circ$ |
| Volume                                       | 951.1(10) $\text{\AA}^3$                                                                               |                  |
| Z                                            | 4                                                                                                      |                  |
| Density (calculated)                         | 1.356 $\text{Mg/m}^3$                                                                                  |                  |
| Absorption coefficient                       | 0.098 $\text{mm}^{-1}$                                                                                 |                  |
| F(000)                                       | 416                                                                                                    |                  |
| Crystal size, color, habit                   | 0.48 x 0.20 x 0.12mm, clear, rod                                                                       |                  |
| Theta range for data collection              | 2.57 – 25.29 $^\circ$                                                                                  |                  |
| Index ranges                                 | $-8 \leq h \leq 8, -17 \leq k \leq 17, -11 \leq l \leq 11$                                             |                  |
| Reflections collected                        | 8,963                                                                                                  |                  |
| Independent reflections                      | 1,704 ( $R_{\text{int}} = 0.0504$ )                                                                    |                  |
| Reflections with $I > 4s(F_o)$               | 901                                                                                                    |                  |
| Absorption correction                        | SADABS based on redundant diffractions                                                                 |                  |
| Max. and min. transmission                   | 1.0, 0.379                                                                                             |                  |
| Refinement method                            | Full-matrix least squares on $F^2$                                                                     |                  |
| Weighting scheme                             | $w = [s^2 (F_o^2) + (aP)^2 + bP]^{-1}$ where:<br>$P = (F_o^2 + 2 F_c^2)/3, a = 0.0549, b = 0.0, q = 1$ |                  |
| Data / restraints / parameters               | 1704 / 0 / 130                                                                                         |                  |
| Goodness-of-fit on $F^2$                     | 0.836                                                                                                  |                  |
| Final R indices [ $I > 2 \text{ sigma}(I)$ ] | R1 = 0.0643, wR2 = 0.1245                                                                              |                  |
| R indices (all data)                         | R1 = 0.1198, wR2 = 0.1406                                                                              |                  |
| Largest diff. peak and hole                  | 0.258, -0.219 $\text{e\AA}^{-3}$                                                                       |                  |

**Supplementary Table S4. Atomic coordinates [ $\times 10^4$ ] and equivalent isotropic displacement parameters [ $\text{\AA}^2 \times 10^3$ ] for 10a.  $U(\text{eq})$  is defined as one third of the trace of the orthogonalized  $U_{ij}$  tensor.**

|       | x        | y       | z        | U(eq) | SOF |
|-------|----------|---------|----------|-------|-----|
| C(1)  | 12961(5) | 5139(2) | 5957(3)  | 32(1) |     |
| C(2)  | 11421(5) | 5259(2) | 6660(3)  | 29(1) |     |
| C(3)  | 10774(5) | 6118(2) | 6897(3)  | 32(1) |     |
| C(4)  | 9335(5)  | 6222(2) | 7564(3)  | 33(1) |     |
| C(5)  | 8503(5)  | 5471(2) | 8020(3)  | 35(1) |     |
| C(6)  | 9097(5)  | 4599(2) | 7805(3)  | 30(1) |     |
| C(7)  | 10544(5) | 4515(2) | 7100(3)  | 30(1) |     |
| C(8)  | 8227(5)  | 3775(2) | 8278(3)  | 33(1) |     |
| C(9)  | 6727(5)  | 3908(2) | 9090(3)  | 30(1) |     |
| C(10) | 5986(5)  | 3025(2) | 9491(3)  | 35(1) |     |
| C(11) | 4463(5)  | 3123(2) | 10301(3) | 37(1) |     |
| O(1)  | 11067(3) | 3656(1) | 6878(2)  | 35(1) |     |
| O(2)  | 13573(3) | 4393(1) | 5700(2)  | 33(1) |     |
| O(3)  | 13718(3) | 5880(2) | 5631(2)  | 35(1) |     |

**Supplementary Table S5. Bond lengths [Å] and angles [°] for 10a.**

---

|                  |          |
|------------------|----------|
| C(1)-O(2)        | 1.233(4) |
| C(1)-O(3)        | 1.294(3) |
| C(1)-C(2)        | 1.443(4) |
| C(2)-C(7)        | 1.385(4) |
| C(2)-C(3)        | 1.387(4) |
| C(3)-C(4)        | 1.354(4) |
| C(4)-C(5)        | 1.384(4) |
| C(5)-C(6)        | 1.387(4) |
| C(6)-C(7)        | 1.382(4) |
| C(6)-C(8)        | 1.492(4) |
| C(7)-O(1)        | 1.355(3) |
| C(8)-C(9)        | 1.501(4) |
| C(9)-C(10)       | 1.496(4) |
| C(10)-C(11)      | 1.506(4) |
| O(2)-C(1)-O(3)   | 121.1(3) |
| O(2)-C(1)-C(2)   | 123.7(3) |
| O(3)-C(1)-C(2)   | 115.2(3) |
| C(7)-C(2)-C(3)   | 118.6(3) |
| C(7)-C(2)-C(1)   | 120.5(3) |
| C(3)-C(2)-C(1)   | 120.9(3) |
| C(4)-C(3)-C(2)   | 120.3(3) |
| C(3)-C(4)-C(5)   | 120.2(3) |
| C(4)-C(5)-C(6)   | 121.6(3) |
| C(7)-C(6)-C(5)   | 116.7(3) |
| C(7)-C(6)-C(8)   | 120.2(3) |
| C(5)-C(6)-C(8)   | 123.0(3) |
| O(1)-C(7)-C(6)   | 115.6(3) |
| O(1)-C(7)-C(2)   | 121.9(3) |
| C(6)-C(7)-C(2)   | 122.4(3) |
| C(6)-C(8)-C(9)   | 117.9(3) |
| C(10)-C(9)-C(8)  | 111.9(3) |
| C(9)-C(10)-C(11) | 113.9(3) |

---

**Supplementary Table S6. Anisotropic displacement parameters [ $\text{\AA}^2 \times 10^3$ ] for 10a. The anisotropic displacement factor exponent takes the form:  $-2\pi^2[h^2a^{*2}U_{11} + \dots + 2hka^*b^*U_{12}]$**

|       | $U_{11}$ | $U_{22}$ | $U_{33}$ | $U_{23}$ | $U_{13}$ | $U_{12}$ |
|-------|----------|----------|----------|----------|----------|----------|
| C(1)  | 36(2)    | 26(2)    | 26(2)    | 5(2)     | 0(2)     | -5(2)    |
| C(2)  | 30(2)    | 29(2)    | 27(2)    | 2(1)     | 8(2)     | 0(2)     |
| C(3)  | 35(2)    | 25(2)    | 31(2)    | 0(2)     | 5(2)     | -5(2)    |
| C(4)  | 36(2)    | 28(2)    | 31(2)    | -2(2)    | 6(2)     | 2(2)     |
| C(5)  | 35(2)    | 36(2)    | 31(2)    | -3(2)    | 7(2)     | 3(2)     |
| C(6)  | 30(2)    | 29(2)    | 25(2)    | -4(2)    | 0(2)     | 1(2)     |
| C(7)  | 37(2)    | 20(2)    | 29(2)    | -3(2)    | 6(2)     | 8(2)     |
| C(8)  | 36(2)    | 31(2)    | 31(2)    | 2(2)     | 9(2)     | -3(2)    |
| C(9)  | 32(2)    | 24(2)    | 30(2)    | 0(2)     | 4(2)     | 0(2)     |
| C(10) | 37(2)    | 31(2)    | 37(2)    | -1(2)    | 11(2)    | -4(2)    |
| C(11) | 41(2)    | 35(2)    | 37(2)    | 0(2)     | 13(2)    | -1(2)    |
| O(1)  | 39(2)    | 28(1)    | 40(2)    | 1(1)     | 15(1)    | 3(1)     |
| O(2)  | 41(2)    | 22(1)    | 37(1)    | -1(1)    | 12(1)    | 3(1)     |
| O(3)  | 39(2)    | 25(1)    | 42(2)    | 1(1)     | 14(1)    | -2(1)    |

**Supplementary Table S7. Hydrogen coordinates [ $\times 10^4$ ] and isotropic displacement parameters [ $\text{\AA}^2 \times 10^3$ ] for 10a.**

|        | x     | y    | z     | U(eq) |
|--------|-------|------|-------|-------|
| H(3)   | 11343 | 6636 | 6589  | 38    |
| H(4)   | 8894  | 6812 | 7719  | 39    |
| H(5)   | 7502  | 5556 | 8492  | 42    |
| H(8A)  | 9388  | 3410 | 8876  | 40    |
| H(8B)  | 7541  | 3410 | 7424  | 40    |
| H(9A)  | 7393  | 4261 | 9962  | 36    |
| H(9B)  | 5536  | 4261 | 8503  | 36    |
| H(10A) | 7184  | 2676 | 10077 | 42    |
| H(10B) | 5341  | 2673 | 8615  | 42    |
| H(11A) | 5107  | 3448 | 11191 | 56    |
| H(11B) | 4030  | 2521 | 10513 | 56    |
| H(11C) | 3263  | 3462 | 9726  | 56    |
| H(1)   | 11989 | 3666 | 6482  | 52    |
| H(3A)  | 14566 | 5755 | 5201  | 53    |

**Supplementary Table S8. Torsion angles [°] for 10a.**

---

|                       |           |
|-----------------------|-----------|
| O(2)-C(1)-C(2)-C(7)   | 0.5(5)    |
| O(3)-C(1)-C(2)-C(7)   | -178.0(3) |
| O(2)-C(1)-C(2)-C(3)   | -178.9(3) |
| O(3)-C(1)-C(2)-C(3)   | 2.6(4)    |
| C(7)-C(2)-C(3)-C(4)   | 0.9(5)    |
| C(1)-C(2)-C(3)-C(4)   | -179.7(3) |
| C(2)-C(3)-C(4)-C(5)   | 0.3(5)    |
| C(3)-C(4)-C(5)-C(6)   | -0.4(5)   |
| C(4)-C(5)-C(6)-C(7)   | -0.6(5)   |
| C(4)-C(5)-C(6)-C(8)   | -179.7(3) |
| C(5)-C(6)-C(7)-O(1)   | -178.7(3) |
| C(8)-C(6)-C(7)-O(1)   | 0.4(4)    |
| C(5)-C(6)-C(7)-C(2)   | 1.9(4)    |
| C(8)-C(6)-C(7)-C(2)   | -179.0(3) |
| C(3)-C(2)-C(7)-O(1)   | 178.6(3)  |
| C(1)-C(2)-C(7)-O(1)   | -0.8(5)   |
| C(3)-C(2)-C(7)-C(6)   | -2.1(5)   |
| C(1)-C(2)-C(7)-C(6)   | 178.5(3)  |
| C(7)-C(6)-C(8)-C(9)   | 177.5(3)  |
| C(5)-C(6)-C(8)-C(9)   | -3.4(5)   |
| C(6)-C(8)-C(9)-C(10)  | 179.9(3)  |
| C(8)-C(9)-C(10)-C(11) | -179.6(2) |

---

**Supplementary Table S9. Crystal and structure refinement for 10e.**

|                                         |                                                                                                                                                               |
|-----------------------------------------|---------------------------------------------------------------------------------------------------------------------------------------------------------------|
| Identification Code                     | <b>13e</b>                                                                                                                                                    |
| Empirical formula                       | C <sub>17</sub> H <sub>18</sub> O <sub>3</sub>                                                                                                                |
| Formula weight                          | 270.31                                                                                                                                                        |
| Temperature                             | 100 K                                                                                                                                                         |
| Wavelength                              | 0.71073 Å                                                                                                                                                     |
| Crystal system                          | Monoclinic                                                                                                                                                    |
| Space Group                             | P2 <sub>1</sub> /c                                                                                                                                            |
| Unit cell dimensions                    | $a = 7.612(3) \text{ \AA}$ $\alpha = 90.0^\circ$<br>$b = 20.668(9) \text{ \AA}$ $\beta = 118.97(2)^\circ$<br>$c = 9.542(3) \text{ \AA}$ $\gamma = 90.0^\circ$ |
| Volume                                  | 1313.4(9) Å <sup>3</sup>                                                                                                                                      |
| Z                                       | 4                                                                                                                                                             |
| Density (calculated)                    | 1.367 Mg/m <sup>3</sup>                                                                                                                                       |
| Absorption coefficient                  | 0.093 mm <sup>-1</sup>                                                                                                                                        |
| F(000)                                  | 576                                                                                                                                                           |
| Crystal size, color, habit              | 0.36 x 0.12 x 0.10 mm, clear, rod                                                                                                                             |
| Theta range for data collection         | 1.97 – 20.81 °                                                                                                                                                |
| Index ranges                            | -7 ≤ h ≤ 7, -20 ≤ k ≤ 20, -9 ≤ l ≤ 9                                                                                                                          |
| Reflections collected                   | 8,835                                                                                                                                                         |
| Independent reflections                 | 1,377 (R <sub>int</sub> = 0.0541)                                                                                                                             |
| Reflections with I > 4(F <sub>o</sub> ) | 844                                                                                                                                                           |
| Absorption correction                   | SADABS based on redundant diffractions                                                                                                                        |
| Max. and min. transmission              | 1.0, 0.643                                                                                                                                                    |
| Refinement method                       | Full-matrix least squares on F <sup>2</sup>                                                                                                                   |
| Weighting scheme                        | $w = q [s^2 (F_o^2) + (aP)^2 + bP]^{-1}$ where:<br>$P = (F_o^2 + 2 F_c^2)/3$ , $a = 0.0543$ , $b = 0.0$ , $q = 1$                                             |
| Data / restraints / parameters          | 1377 / 0 / 182                                                                                                                                                |
| Goodness-of-fit on F <sup>2</sup>       | 0.913                                                                                                                                                         |

Final R indices [ $I > 2 \sigma(I)$ ] R1 = 0.0683, wR2 = 0.1373

R indices (all data) R1 = 0.1010, wR2 = 0.1495

Largest diff. peak and hole 0.242, -0.270 eÅ<sup>-3</sup>

**Supplementary Table S10. Atomic coordinates [ $\times 10^4$ ] and equivalent isotropic displacement parameters [ $\text{Å}^2 \times 10^3$ ] for 10e. U(eq) is defined as one third of the trace of the orthogonalized  $U_{ij}$  tensor.**

|       | x       | y        | z       | U(eq) | SOF |
|-------|---------|----------|---------|-------|-----|
| O(1)  | 7811(5) | 10496(2) | 8727(4) | 43(1) |     |
| O(2)  | 8236(5) | 9467(2)  | 9383(4) | 43(1) |     |
| O(3)  | 5316(5) | 8787(2)  | 9060(4) | 42(1) |     |
| C(1)  | 4205(7) | 12126(3) | 6554(7) | 38(2) |     |
| C(2)  | 4801(7) | 12099(3) | 5403(7) | 41(2) |     |
| C(3)  | 5055(8) | 11511(3) | 4894(7) | 45(2) |     |
| C(4)  | 4747(7) | 10951(3) | 5498(7) | 43(2) |     |
| C(5)  | 4140(7) | 10979(3) | 6654(7) | 37(2) |     |
| C(6)  | 3906(7) | 11573(3) | 7163(7) | 40(2) |     |
| C(7)  | 3619(8) | 10386(3) | 7214(7) | 38(2) |     |
| C(8)  | 1631(8) | 10314(3) | 6821(6) | 42(2) |     |
| C(9)  | 932(9)  | 9758(3)  | 7174(6) | 42(2) |     |
| C(10) | 2139(8) | 9239(3)  | 7888(7) | 40(2) |     |
| C(11) | 4176(9) | 9306(3)  | 8323(7) | 40(2) |     |
| C(12) | 4935(8) | 9871(3)  | 8027(6) | 37(2) |     |
| C(13) | 7110(9) | 9926(3)  | 8755(7) | 39(2) |     |
| C(14) | 1383(7) | 8633(2)  | 8230(6) | 43(2) |     |
| C(15) | 1036(8) | 8086(2)  | 7078(7) | 42(2) |     |
| C(16) | 269(8)  | 7494(2)  | 7478(7) | 42(2) |     |
| C(17) | 114(7)  | 6911(2)  | 6464(7) | 44(2) |     |



**Supplementary Table S11. Bond lengths [Å] and angles [°] for 10e.**

---

|                   |          |
|-------------------|----------|
| O(1)-C(13)        | 1.300(6) |
| O(2)-C(13)        | 1.222(6) |
| O(3)-C(11)        | 1.344(6) |
| C(1)-C(6)         | 1.351(7) |
| C(1)-C(2)         | 1.377(7) |
| C(2)-C(3)         | 1.356(7) |
| C(3)-C(4)         | 1.365(7) |
| C(4)-C(5)         | 1.387(7) |
| C(5)-C(6)         | 1.364(7) |
| C(5)-C(7)         | 1.466(7) |
| C(7)-C(8)         | 1.380(7) |
| C(7)-C(12)        | 1.409(7) |
| C(8)-C(9)         | 1.374(6) |
| C(9)-C(10)        | 1.361(7) |
| C(10)-C(11)       | 1.405(7) |
| C(10)-C(14)       | 1.479(7) |
| C(11)-C(12)       | 1.391(7) |
| C(12)-C(13)       | 1.457(7) |
| C(14)-C(15)       | 1.509(7) |
| C(15)-C(16)       | 1.483(6) |
| C(16)-C(17)       | 1.513(7) |
| C(6)-C(1)-C(2)    | 119.9(5) |
| C(3)-C(2)-C(1)    | 118.7(5) |
| C(2)-C(3)-C(4)    | 121.7(6) |
| C(3)-C(4)-C(5)    | 119.5(5) |
| C(6)-C(5)-C(4)    | 118.2(5) |
| C(6)-C(5)-C(7)    | 121.2(5) |
| C(4)-C(5)-C(7)    | 120.5(5) |
| C(1)-C(6)-C(5)    | 122.0(5) |
| C(8)-C(7)-C(12)   | 117.5(5) |
| C(8)-C(7)-C(5)    | 116.5(5) |
| C(12)-C(7)-C(5)   | 125.9(5) |
| C(9)-C(8)-C(7)    | 121.9(5) |
| C(10)-C(9)-C(8)   | 122.3(5) |
| C(9)-C(10)-C(11)  | 116.8(5) |
| C(9)-C(10)-C(14)  | 122.5(5) |
| C(11)-C(10)-C(14) | 120.7(5) |
| O(3)-C(11)-C(12)  | 123.3(5) |
| O(3)-C(11)-C(10)  | 114.6(5) |
| C(12)-C(11)-C(10) | 122.0(5) |
| C(11)-C(12)-C(7)  | 119.4(5) |
| C(11)-C(12)-C(13) | 117.1(5) |
| C(7)-C(12)-C(13)  | 123.0(5) |
| O(2)-C(13)-O(1)   | 121.1(5) |
| O(2)-C(13)-C(12)  | 122.6(5) |
| O(1)-C(13)-C(12)  | 116.3(5) |
| C(10)-C(14)-C(15) | 115.0(4) |
| C(16)-C(15)-C(14) | 112.5(4) |
| C(15)-C(16)-C(17) | 114.2(4) |

---

**Supplementary Table S12. Anisotropic displacement parameters [ $\text{\AA}^2 \times 10^3$ ] for 10e. The anisotropic displacement factor exponent takes the form:  $-2\pi^2[h^2a^{*2}U_{11} + \dots + 2hka^*b^*U_{12}]$**

|       | $U_{11}$ | $U_{22}$ | $U_{33}$ | $U_{23}$ | $U_{13}$ | $U_{12}$ |
|-------|----------|----------|----------|----------|----------|----------|
| O(1)  | 39(2)    | 39(2)    | 50(3)    | 1(2)     | 22(2)    | -4(2)    |
| O(2)  | 38(2)    | 35(2)    | 56(3)    | 3(2)     | 24(2)    | 4(2)     |
| O(3)  | 39(2)    | 38(2)    | 55(3)    | 3(2)     | 26(2)    | 2(2)     |
| C(1)  | 29(3)    | 40(4)    | 40(4)    | -2(3)    | 12(3)    | 4(3)     |
| C(2)  | 29(3)    | 40(4)    | 48(4)    | 5(3)     | 14(3)    | 3(3)     |
| C(3)  | 41(4)    | 42(4)    | 52(4)    | 5(4)     | 23(3)    | 3(3)     |
| C(4)  | 40(4)    | 42(4)    | 50(4)    | -4(3)    | 24(3)    | -6(3)    |
| C(5)  | 23(3)    | 35(4)    | 44(4)    | -3(3)    | 10(3)    | -2(3)    |
| C(6)  | 28(3)    | 42(4)    | 47(4)    | 8(3)     | 17(3)    | 1(3)     |
| C(7)  | 40(4)    | 33(4)    | 43(4)    | -9(3)    | 20(3)    | 1(3)     |
| C(8)  | 37(4)    | 44(4)    | 45(4)    | 1(3)     | 21(3)    | 3(3)     |
| C(9)  | 40(4)    | 40(4)    | 47(4)    | -5(3)    | 22(3)    | -4(3)    |
| C(10) | 39(4)    | 35(4)    | 46(4)    | -5(3)    | 22(3)    | -1(3)    |
| C(11) | 46(4)    | 33(4)    | 42(4)    | 2(3)     | 23(3)    | 9(3)     |
| C(12) | 38(4)    | 36(4)    | 40(4)    | -1(3)    | 22(3)    | 0(3)     |
| C(13) | 49(5)    | 32(4)    | 41(4)    | 0(3)     | 27(4)    | -5(3)    |
| C(14) | 35(4)    | 42(4)    | 52(4)    | -4(3)    | 22(3)    | -2(3)    |
| C(15) | 42(4)    | 38(4)    | 52(4)    | 2(3)     | 28(3)    | -1(3)    |
| C(16) | 32(3)    | 39(4)    | 55(4)    | -2(3)    | 21(3)    | -3(3)    |
| C(17) | 33(4)    | 41(4)    | 62(4)    | 1(3)     | 27(3)    | 4(3)     |

**Supplementary Table S13. Hydrogen coordinates [ $\times 10^4$ ] and isotropic displacement parameters [ $\text{\AA}^2 \times 10^3$ ] for 10e.**

|        | x     | y     | z    | U(eq) |
|--------|-------|-------|------|-------|
| H(5)   | 9495  | 10492 | 9656 | 64    |
| H(3A)  | 6501  | 8856  | 9253 | 63    |
| H(1)   | 4005  | 12533 | 6918 | 46    |
| H(2)   | 5031  | 12485 | 4974 | 49    |
| H(3)   | 5458  | 11489 | 4096 | 54    |
| H(4)   | 4945  | 10544 | 5131 | 51    |
| H(6)   | 3521  | 11599 | 7971 | 47    |
| H(8)   | 719   | 10658 | 6292 | 50    |
| H(9)   | -441  | 9735  | 6909 | 50    |
| H(14A) | 102   | 8727  | 8221 | 51    |
| H(14B) | 2357  | 8487  | 9324 | 51    |
| H(15A) | 60    | 8227  | 5980 | 50    |
| H(15B) | 2315  | 7983  | 7092 | 50    |
| H(16A) | -1076 | 7587  | 7351 | 50    |
| H(16B) | 1168  | 7385  | 8618 | 50    |
| H(17A) | -756  | 7015  | 5331 | 66    |
| H(17B) | -458  | 6547  | 6765 | 66    |
| H(17C) | 1454  | 6795  | 6640 | 66    |

**Supplementary Table S14. Torsion angles [°] for 10e.**

---

|                         |           |
|-------------------------|-----------|
| C(6)-C(1)-C(2)-C(3)     | 0.7(7)    |
| C(1)-C(2)-C(3)-C(4)     | -0.4(8)   |
| C(2)-C(3)-C(4)-C(5)     | 0.6(8)    |
| C(3)-C(4)-C(5)-C(6)     | -1.0(7)   |
| C(3)-C(4)-C(5)-C(7)     | 174.3(5)  |
| C(2)-C(1)-C(6)-C(5)     | -1.2(8)   |
| C(4)-C(5)-C(6)-C(1)     | 1.4(8)    |
| C(7)-C(5)-C(6)-C(1)     | -173.9(5) |
| C(6)-C(5)-C(7)-C(8)     | 62.6(7)   |
| C(4)-C(5)-C(7)-C(8)     | -112.6(6) |
| C(6)-C(5)-C(7)-C(12)    | -121.4(6) |
| C(4)-C(5)-C(7)-C(12)    | 63.4(8)   |
| C(12)-C(7)-C(8)-C(9)    | -1.3(8)   |
| C(5)-C(7)-C(8)-C(9)     | 175.0(5)  |
| C(7)-C(8)-C(9)-C(10)    | -1.9(8)   |
| C(8)-C(9)-C(10)-C(11)   | 2.8(8)    |
| C(8)-C(9)-C(10)-C(14)   | -178.3(5) |
| C(9)-C(10)-C(11)-O(3)   | 178.4(5)  |
| C(14)-C(10)-C(11)-O(3)  | -0.5(7)   |
| C(9)-C(10)-C(11)-C(12)  | -0.6(8)   |
| C(14)-C(10)-C(11)-C(12) | -179.6(5) |
| O(3)-C(11)-C(12)-C(7)   | 178.6(5)  |
| C(10)-C(11)-C(12)-C(7)  | -2.5(8)   |
| O(3)-C(11)-C(12)-C(13)  | -8.7(8)   |
| C(10)-C(11)-C(12)-C(13) | 170.3(5)  |
| C(8)-C(7)-C(12)-C(11)   | 3.4(8)    |
| C(5)-C(7)-C(12)-C(11)   | -172.6(5) |
| C(8)-C(7)-C(12)-C(13)   | -169.0(5) |
| C(5)-C(7)-C(12)-C(13)   | 15.1(9)   |
| C(11)-C(12)-C(13)-O(2)  | 11.5(8)   |
| C(7)-C(12)-C(13)-O(2)   | -176.0(5) |
| C(11)-C(12)-C(13)-O(1)  | -167.4(5) |
| C(7)-C(12)-C(13)-O(1)   | 5.1(8)    |
| C(9)-C(10)-C(14)-C(15)  | 102.1(6)  |
| C(11)-C(10)-C(14)-C(15) | -79.0(6)  |
| C(10)-C(14)-C(15)-C(16) | -179.7(5) |
| C(14)-C(15)-C(16)-C(17) | -173.7(4) |

---

**Supplementary Table S15. Crystal and structure refinement for 13a.**

|                                          |                                                                                                                                                                   |
|------------------------------------------|-------------------------------------------------------------------------------------------------------------------------------------------------------------------|
| Identification Code                      | <b>17a</b>                                                                                                                                                        |
| Empirical formula                        | C <sub>15</sub> H <sub>17</sub> NO <sub>2</sub>                                                                                                                   |
| Formula weight                           | 243.30                                                                                                                                                            |
| Temperature                              | 100 K                                                                                                                                                             |
| Wavelength                               | 0.71073 Å                                                                                                                                                         |
| Crystal system                           | Monoclinic                                                                                                                                                        |
| Space Group                              | P2 <sub>1</sub> /c                                                                                                                                                |
| Unit cell dimensions                     | $a = 10.591(4) \text{ \AA}$ $\alpha = 90.0^\circ$<br>$b = 4.9385(19) \text{ \AA}$ $\beta = 93.823(7)^\circ$<br>$c = 24.376(9) \text{ \AA}$ $\gamma = 90.00^\circ$ |
| Volume                                   | 1272.1(9) Å <sup>3</sup>                                                                                                                                          |
| Z                                        | 4                                                                                                                                                                 |
| Density (calculated)                     | 1.270 Mg/m <sup>3</sup>                                                                                                                                           |
| Absorption coefficient                   | 0.084 mm <sup>-1</sup>                                                                                                                                            |
| F(000)                                   | 520                                                                                                                                                               |
| Crystal size, color, habit               | 0.32 x 0.32 x 0.40 mm, clear, fragment                                                                                                                            |
| Theta range for data collection          | 1.93 – 25.10 °                                                                                                                                                    |
| Index ranges                             | -12 ≤ h ≤ 12, -5 ≤ k ≤ 5, -29 ≤ l ≤ 29                                                                                                                            |
| Reflections collected                    | 11,501                                                                                                                                                            |
| Independent reflections                  | 2,254 (R <sub>int</sub> = 0.0603)                                                                                                                                 |
| Reflections with I > 4σ(F <sub>o</sub> ) | 1,589                                                                                                                                                             |
| Absorption correction                    | SADABS based on redundant diffractions                                                                                                                            |
| Max. and min. transmission               | 1.0, 0.672                                                                                                                                                        |
| Refinement method                        | Full-matrix least squares on F <sup>2</sup>                                                                                                                       |
| Weighting scheme                         | $w = q [s^2 (F_o^2) + (aP)^2 + bP]^{-1}$ where:<br>$P = (F_o^2 + 2 F_c^2)/3$ , a = 0.0589, b = 0.0, q = 1                                                         |
| Data / restraints / parameters           | 2254 / 0 / 166                                                                                                                                                    |
| Goodness-of-fit on F <sup>2</sup>        | 0.926                                                                                                                                                             |

Final R indices [ $I > 2 \sigma(I)$ ] R1 = 0.0496, wR2 = 0.1075

R indices (all data) R1 = 0.0693, wR2 = 0.1142

Largest diff. peak and hole 0.238, -0.160 eÅ<sup>-3</sup>

**Supplementary Table S16. Atomic coordinates [ $\times 10^4$ ] and equivalent isotropic displacement parameters [ $\text{Å}^2 \times 10^3$ ] for 13a. U(eq) is defined as one third of the trace of the orthogonalized  $U_{ij}$  tensor.**

|       | x       | y        | z       | U(eq) | SOF |
|-------|---------|----------|---------|-------|-----|
| C(1)  | 7085(2) | 1629(4)  | 1754(1) | 27(1) |     |
| C(2)  | 8204(2) | 2795(4)  | 2007(1) | 30(1) |     |
| C(3)  | 8698(2) | 1905(4)  | 2510(1) | 31(1) |     |
| C(4)  | 8111(2) | -193(4)  | 2788(1) | 32(1) |     |
| C(5)  | 7032(2) | -1335(4) | 2561(1) | 30(1) |     |
| C(6)  | 6485(2) | -466(4)  | 2040(1) | 27(1) |     |
| C(7)  | 5361(2) | -1673(4) | 1806(1) | 30(1) |     |
| C(8)  | 4818(2) | -912(4)  | 1303(1) | 28(1) |     |
| C(9)  | 5414(2) | 1189(4)  | 1020(1) | 27(1) |     |
| C(10) | 6522(2) | 2459(4)  | 1223(1) | 26(1) |     |
| C(11) | 7100(2) | 4584(4)  | 909(1)  | 30(1) |     |
| C(12) | 3629(2) | -2206(4) | 1050(1) | 31(1) |     |
| C(13) | 2439(2) | -489(4)  | 1099(1) | 29(1) |     |
| C(14) | 1279(2) | -1619(4) | 771(1)  | 35(1) |     |
| C(15) | 105(2)  | 105(5)   | 816(1)  | 48(1) |     |
| N(1)  | 6592(2) | 5362(3)  | 445(1)  | 31(1) |     |
| O(1)  | 4845(1) | 1861(3)  | 519(1)  | 31(1) |     |
| O(2)  | 7272(1) | 7405(3)  | 200(1)  | 39(1) |     |

**Supplementary Table S17. Bond lengths [Å] and angles [°] for 13a.**

---

|                   |            |
|-------------------|------------|
| C(1)-C(6)         | 1.420(3)   |
| C(1)-C(2)         | 1.421(3)   |
| C(1)-C(10)        | 1.448(3)   |
| C(2)-C(3)         | 1.374(3)   |
| C(3)-C(4)         | 1.405(3)   |
| C(4)-C(5)         | 1.359(3)   |
| C(5)-C(6)         | 1.427(3)   |
| C(6)-C(7)         | 1.418(3)   |
| C(7)-C(8)         | 1.371(3)   |
| C(8)-C(9)         | 1.417(3)   |
| C(8)-C(12)        | 1.507(3)   |
| C(9)-O(1)         | 1.365(2)   |
| C(9)-C(10)        | 1.392(3)   |
| C(10)-C(11)       | 1.457(3)   |
| C(11)-N(1)        | 1.279(2)   |
| C(12)-C(13)       | 1.530(3)   |
| C(13)-C(14)       | 1.525(3)   |
| C(14)-C(15)       | 1.517(3)   |
| N(1)-O(2)         | 1.396(2)   |
| C(6)-C(1)-C(2)    | 118.00(17) |
| C(6)-C(1)-C(10)   | 118.29(17) |
| C(2)-C(1)-C(10)   | 123.71(18) |
| C(3)-C(2)-C(1)    | 121.00(19) |
| C(2)-C(3)-C(4)    | 120.79(18) |
| C(5)-C(4)-C(3)    | 119.83(18) |
| C(4)-C(5)-C(6)    | 121.17(19) |
| C(7)-C(6)-C(1)    | 119.99(17) |
| C(7)-C(6)-C(5)    | 120.80(18) |
| C(1)-C(6)-C(5)    | 119.20(18) |
| C(8)-C(7)-C(6)    | 122.37(19) |
| C(7)-C(8)-C(9)    | 117.53(18) |
| C(7)-C(8)-C(12)   | 122.53(18) |
| C(9)-C(8)-C(12)   | 119.93(17) |
| O(1)-C(9)-C(10)   | 121.28(17) |
| O(1)-C(9)-C(8)    | 115.38(17) |
| C(10)-C(9)-C(8)   | 123.31(18) |
| C(9)-C(10)-C(1)   | 118.49(18) |
| C(9)-C(10)-C(11)  | 120.80(17) |
| C(1)-C(10)-C(11)  | 120.71(17) |
| N(1)-C(11)-C(10)  | 120.88(18) |
| C(8)-C(12)-C(13)  | 113.81(16) |
| C(14)-C(13)-C(12) | 113.32(16) |
| C(15)-C(14)-C(13) | 113.09(17) |
| C(11)-N(1)-O(2)   | 113.33(16) |

**Supplementary Table S18. Anisotropic displacement parameters [ $\text{\AA}^2 \times 10^3$ ] for 13a. The anisotropic displacement factor exponent takes the form:  $-2\pi^2[h^2a^{*2}U_{11} + \dots + 2hka^*b^*U_{12}]$**

|       | $U_{11}$ | $U_{22}$ | $U_{33}$ | $U_{23}$ | $U_{13}$ | $U_{12}$ |
|-------|----------|----------|----------|----------|----------|----------|
| C(1)  | 28(1)    | 30(1)    | 23(1)    | -3(1)    | 4(1)     | 6(1)     |
| C(2)  | 32(1)    | 32(1)    | 27(1)    | 1(1)     | 4(1)     | 1(1)     |
| C(3)  | 30(1)    | 34(1)    | 28(1)    | -2(1)    | -1(1)    | 2(1)     |
| C(4)  | 34(1)    | 37(1)    | 24(1)    | 1(1)     | 1(1)     | 6(1)     |
| C(5)  | 34(1)    | 32(1)    | 26(1)    | 2(1)     | 4(1)     | 3(1)     |
| C(6)  | 31(1)    | 27(1)    | 25(1)    | -2(1)    | 6(1)     | 4(1)     |
| C(7)  | 33(1)    | 30(1)    | 28(1)    | 2(1)     | 7(1)     | 2(1)     |
| C(8)  | 30(1)    | 28(1)    | 26(1)    | -3(1)    | 5(1)     | 4(1)     |
| C(9)  | 32(1)    | 30(1)    | 21(1)    | -1(1)    | 2(1)     | 6(1)     |
| C(10) | 28(1)    | 28(1)    | 25(1)    | -1(1)    | 4(1)     | 3(1)     |
| C(11) | 27(1)    | 37(1)    | 26(1)    | 0(1)     | -1(1)    | -1(1)    |
| C(12) | 37(1)    | 30(1)    | 25(1)    | 1(1)     | 2(1)     | -2(1)    |
| C(13) | 34(1)    | 31(1)    | 23(1)    | -2(1)    | 4(1)     | -3(1)    |
| C(14) | 38(1)    | 37(1)    | 29(1)    | 1(1)     | -1(1)    | -7(1)    |
| C(15) | 37(1)    | 53(2)    | 51(2)    | -5(1)    | -6(1)    | -5(1)    |
| N(1)  | 33(1)    | 34(1)    | 26(1)    | 5(1)     | 4(1)     | -4(1)    |
| O(1)  | 35(1)    | 36(1)    | 23(1)    | 3(1)     | -1(1)    | -4(1)    |
| O(2)  | 38(1)    | 48(1)    | 31(1)    | 15(1)    | -3(1)    | -11(1)   |



**Supplementary Table S19. Hydrogen coordinates [ $\times 10^4$ ] and isotropic displacement parameters [ $\text{\AA}^2 \times 10^3$ ] for 13a.**

---

|        | x    | y     | z    | U(eq) |
|--------|------|-------|------|-------|
| H(2)   | 8616 | 4213  | 1825 | 36    |
| H(3)   | 9445 | 2717  | 2673 | 37    |
| H(4)   | 8468 | -812  | 3133 | 38    |
| H(5)   | 6633 | -2736 | 2753 | 36    |
| H(7)   | 4969 | -3060 | 2004 | 36    |
| H(11)  | 7865 | 5403  | 1051 | 36    |
| H(12A) | 3507 | -3973 | 1231 | 37    |
| H(12B) | 3738 | -2559 | 656  | 37    |
| H(13A) | 2255 | -366  | 1491 | 35    |
| H(13B) | 2604 | 1367  | 968  | 35    |
| H(14A) | 1465 | -1756 | 379  | 42    |
| H(14B) | 1108 | -3468 | 904  | 42    |
| H(15A) | -89  | 239   | 1203 | 71    |
| H(15B) | -610 | -730  | 603  | 71    |
| H(15C) | 256  | 1920  | 672  | 71    |
| H(1)   | 5273 | 3060  | 373  | 47    |
| H(2A)  | 6824 | 8088  | -61  | 59    |

---

**Supplementary Table S20. Torsion angles [°] for 13a.**

---

|                         |             |
|-------------------------|-------------|
| C(6)-C(1)-C(2)-C(3)     | 0.6(3)      |
| C(10)-C(1)-C(2)-C(3)    | -179.45(17) |
| C(1)-C(2)-C(3)-C(4)     | 0.2(3)      |
| C(2)-C(3)-C(4)-C(5)     | -0.9(3)     |
| C(3)-C(4)-C(5)-C(6)     | 0.8(3)      |
| C(2)-C(1)-C(6)-C(7)     | 179.44(17)  |
| C(10)-C(1)-C(6)-C(7)    | -0.5(3)     |
| C(2)-C(1)-C(6)-C(5)     | -0.8(3)     |
| C(10)-C(1)-C(6)-C(5)    | 179.34(17)  |
| C(4)-C(5)-C(6)-C(7)     | 179.83(18)  |
| C(4)-C(5)-C(6)-C(1)     | 0.0(3)      |
| C(1)-C(6)-C(7)-C(8)     | 0.6(3)      |
| C(5)-C(6)-C(7)-C(8)     | -179.23(18) |
| C(6)-C(7)-C(8)-C(9)     | -0.9(3)     |
| C(6)-C(7)-C(8)-C(12)    | 179.46(17)  |
| C(7)-C(8)-C(9)-O(1)     | 179.46(16)  |
| C(12)-C(8)-C(9)-O(1)    | -0.9(3)     |
| C(7)-C(8)-C(9)-C(10)    | 1.2(3)      |
| C(12)-C(8)-C(9)-C(10)   | -179.13(17) |
| O(1)-C(9)-C(10)-C(1)    | -179.30(16) |
| C(8)-C(9)-C(10)-C(1)    | -1.2(3)     |
| O(1)-C(9)-C(10)-C(11)   | 1.0(3)      |
| C(8)-C(9)-C(10)-C(11)   | 179.15(18)  |
| C(6)-C(1)-C(10)-C(9)    | 0.8(3)      |
| C(2)-C(1)-C(10)-C(9)    | -179.15(17) |
| C(6)-C(1)-C(10)-C(11)   | -179.56(17) |
| C(2)-C(1)-C(10)-C(11)   | 0.5(3)      |
| C(9)-C(10)-C(11)-N(1)   | 1.2(3)      |
| C(1)-C(10)-C(11)-N(1)   | -178.51(17) |
| C(7)-C(8)-C(12)-C(13)   | 102.3(2)    |
| C(9)-C(8)-C(12)-C(13)   | -77.3(2)    |
| C(8)-C(12)-C(13)-C(14)  | 171.63(16)  |
| C(12)-C(13)-C(14)-C(15) | -179.48(17) |
| C(10)-C(11)-N(1)-O(2)   | -179.81(16) |

---

**Supplementary Table S21. Crystal and structure refinement for 13f.**

|                                          |                                                                                                          |                            |
|------------------------------------------|----------------------------------------------------------------------------------------------------------|----------------------------|
| Identification Code                      | <b>17f</b>                                                                                               |                            |
| Empirical formula                        | C <sub>15</sub> H <sub>16</sub> BrNO <sub>2</sub>                                                        |                            |
| Formula weight                           | 322.20                                                                                                   |                            |
| Temperature                              | 100 K                                                                                                    |                            |
| Wavelength                               | 0.71073 Å                                                                                                |                            |
| Crystal system                           | Triclinic                                                                                                |                            |
| Space Group                              | P1(bar)                                                                                                  |                            |
| Unit cell dimensions                     | $a = 9.978(5) \text{ \AA}$                                                                               | $a = 108.600(8)^\circ$     |
|                                          | $b = 14.249(7) \text{ \AA}$                                                                              | $b = 90.668(8)^\circ$      |
|                                          | $c = 20.322(9) \text{ \AA}$                                                                              | $\gamma = 94.197(9)^\circ$ |
| Volume                                   | 2729(2) Å <sup>3</sup>                                                                                   |                            |
| Z                                        | 8                                                                                                        |                            |
| Density (calculated)                     | 1.568 Mg/m <sup>3</sup>                                                                                  |                            |
| Absorption coefficient                   | 3.009 mm <sup>-1</sup>                                                                                   |                            |
| F(000)                                   | 1312                                                                                                     |                            |
| Crystal size, color, habit               | 0.48 x 0.20 x 0.16 mm, clear, rod                                                                        |                            |
| Theta range for data collection          | 1.06 – 28.66 °                                                                                           |                            |
| Index ranges                             | -13 ≤ h ≤ 13, -18 ≤ k ≤ 18, -26 ≤ l ≤ 27                                                                 |                            |
| Reflections collected                    | 32,769                                                                                                   |                            |
| Independent reflections                  | 13,094 (R <sub>int</sub> = 0.0412)                                                                       |                            |
| Reflections with I > 4σ(F <sub>o</sub> ) | 6,422                                                                                                    |                            |
| Absorption correction                    | SADABS based on redundant diffractions                                                                   |                            |
| Max. and min. transmission               | 1.0, 0.719                                                                                               |                            |
| Refinement method                        | Full-matrix least squares on F <sup>2</sup>                                                              |                            |
| Weighting scheme                         | $w = q [s^2 (F_o^2) + (aP)^2 + bP]^{-1}$ where:<br>$P = (F_o^2 + 2F_c^2)/3$ , a = 0.0532, b = 0.0, q = 1 |                            |
| Data / restraints / parameters           | 13094 / 0 / 697                                                                                          |                            |
| Goodness-of-fit on F <sup>2</sup>        | 0.685                                                                                                    |                            |
| Final R indices [I > 2 σ(I)]             | R1 = 0.0566, wR2 = 0.1184                                                                                |                            |
| R indices (all data)                     | R1 = 0.1054, wR2 = 0.1226                                                                                |                            |
| Largest diff. peak and hole              | 0.837, -0.516 eÅ <sup>-3</sup>                                                                           |                            |

**Supplementary Table S22. Atomic coordinates [ $\times 10^4$ ] and equivalent isotropic displacement parameters [ $\text{\AA}^2 \times 10^3$ ] for 13f. U(eq) is defined as one third of the trace of the orthogonalized  $U_{ij}$  tensor.**

|       | x        | y        | z        | U(eq) | SOF |
|-------|----------|----------|----------|-------|-----|
| Br(1) | 10157(1) | 9583(1)  | 751(1)   | 34(1) |     |
| Br(2) | 4509(1)  | 4382(1)  | 10619(1) | 39(1) |     |
| Br(3) | 13923(1) | 4122(1)  | 4324(1)  | 33(1) |     |
| Br(4) | 8918(1)  | 9275(1)  | 4338(1)  | 34(1) |     |
| C(1)  | 9036(5)  | 8739(4)  | 1132(2)  | 28(1) |     |
| C(2)  | 8961(5)  | 7756(4)  | 731(2)   | 28(1) |     |
| C(3)  | 8074(5)  | 7062(4)  | 889(2)   | 27(1) |     |
| C(4)  | 7248(5)  | 7381(4)  | 1429(2)  | 27(1) |     |
| C(5)  | 7336(5)  | 8387(3)  | 1850(2)  | 23(1) |     |
| C(6)  | 8283(5)  | 9103(4)  | 1726(2)  | 24(1) |     |
| C(7)  | 8359(5)  | 10107(3) | 2220(3)  | 24(1) |     |
| C(8)  | 9460(5)  | 10851(3) | 2227(2)  | 25(1) |     |
| C(9)  | 7417(5)  | 10340(3) | 2734(3)  | 26(1) |     |
| C(10) | 6468(5)  | 9625(4)  | 2853(2)  | 26(1) |     |
| C(11) | 6453(5)  | 8677(3)  | 2418(2)  | 24(1) |     |
| C(12) | 5529(5)  | 9954(3)  | 3455(2)  | 26(1) |     |
| C(13) | 4520(5)  | 9154(3)  | 3524(2)  | 25(1) |     |
| C(14) | 3612(5)  | 9536(4)  | 4135(3)  | 30(1) |     |
| C(15) | 2765(5)  | 8696(4)  | 4278(3)  | 35(1) |     |
| C(16) | 4081(5)  | 3008(3)  | 10485(3) | 25(1) |     |
| C(17) | 3089(5)  | 2830(3)  | 10904(2) | 26(1) |     |
| C(18) | 2550(5)  | 1861(3)  | 10815(2) | 27(1) |     |
| C(19) | 2987(5)  | 1099(4)  | 10297(3) | 26(1) |     |
| C(20) | 4025(5)  | 1262(3)  | 9862(2)  | 24(1) |     |
| C(21) | 4653(5)  | 2233(3)  | 9959(2)  | 23(1) |     |
| C(22) | 5738(5)  | 2321(3)  | 9513(2)  | 23(1) |     |
| C(23) | 6687(5)  | 3218(4)  | 9675(3)  | 29(1) |     |
| C(24) | 6018(5)  | 1488(4)  | 8956(3)  | 26(1) |     |
| C(25) | 5362(5)  | 529(4)   | 8851(2)  | 25(1) |     |
| C(26) | 4418(5)  | 440(4)   | 9304(2)  | 24(1) |     |
| C(27) | 5785(5)  | -338(3)  | 8259(2)  | 25(1) |     |
| C(28) | 4970(5)  | -1326(3) | 8145(2)  | 27(1) |     |
| C(29) | 5445(5)  | -2170(3) | 7547(3)  | 32(1) |     |
| C(30) | 4638(5)  | -3152(3) | 7462(3)  | 36(1) |     |
| C(31) | 12242(5) | 3505(4)  | 4466(2)  | 25(1) |     |
| C(32) | 11988(5) | 2551(4)  | 4029(3)  | 29(1) |     |
| C(33) | 10874(5) | 1946(4)  | 4113(3)  | 32(1) |     |
| C(34) | 10063(5) | 2301(3)  | 4649(2)  | 27(1) |     |
| C(35) | 10297(5) | 3274(3)  | 5112(2)  | 24(1) |     |
| C(36) | 11383(5) | 3943(3)  | 5021(2)  | 24(1) |     |
| C(37) | 11500(5) | 4945(3)  | 5497(2)  | 23(1) |     |
| C(38) | 12352(5) | 5747(4)  | 5371(3)  | 26(1) |     |
| C(39) | 10638(5) | 5191(3)  | 6055(3)  | 25(1) |     |
| C(40) | 9595(5)  | 4520(3)  | 6153(2)  | 24(1) |     |

|       |          |          |         |       |
|-------|----------|----------|---------|-------|
| C(41) | 9453(5)  | 3592(3)  | 5675(2) | 23(1) |
| C(42) | 8680(5)  | 4870(3)  | 6755(2) | 26(1) |
| C(43) | 7683(5)  | 4087(3)  | 6863(2) | 26(1) |
| C(44) | 6890(5)  | 4446(3)  | 7521(3) | 30(1) |
| C(45) | 6021(5)  | 3622(4)  | 7658(3) | 34(1) |
| C(46) | 7888(5)  | 8023(3)  | 3957(3) | 24(1) |
| C(47) | 6855(5)  | 7880(4)  | 4377(3) | 29(1) |
| C(48) | 6097(5)  | 6985(4)  | 4208(3) | 28(1) |
| C(49) | 6378(5)  | 6222(4)  | 3638(3) | 28(1) |
| C(50) | 7406(5)  | 6341(4)  | 3198(2) | 25(1) |
| C(51) | 8189(5)  | 7274(3)  | 3332(2) | 25(1) |
| C(52) | 9203(5)  | 7355(3)  | 2851(2) | 23(1) |
| C(53) | 9844(5)  | 8307(4)  | 2833(2) | 25(1) |
| C(54) | 9461(5)  | 6502(3)  | 2311(2) | 23(1) |
| C(55) | 8713(5)  | 5569(4)  | 2178(3) | 26(1) |
| C(56) | 7701(5)  | 5527(3)  | 2615(2) | 24(1) |
| C(57) | 9060(5)  | 4710(3)  | 1573(2) | 28(1) |
| C(58) | 8303(5)  | 3724(3)  | 1518(2) | 27(1) |
| C(59) | 8816(5)  | 2868(3)  | 951(3)  | 29(1) |
| C(60) | 7973(5)  | 1884(3)  | 854(3)  | 34(1) |
| N(1)  | 9353(4)  | 11774(3) | 2533(2) | 26(1) |
| N(2)  | 7532(4)  | 3313(3)  | 9224(2) | 31(1) |
| N(3)  | 12559(4) | 6598(3)  | 5839(2) | 27(1) |
| N(4)  | 10931(4) | 8346(3)  | 2520(2) | 28(1) |
| O(1)  | 7408(3)  | 11279(2) | 3194(2) | 31(1) |
| O(2)  | 10515(3) | 12366(3) | 2507(2) | 33(1) |
| O(3)  | 6963(3)  | 1536(2)  | 8499(2) | 31(1) |
| O(4)  | 8443(4)  | 4149(2)  | 9493(2) | 36(1) |
| O(5)  | 10728(3) | 6109(2)  | 6536(2) | 28(1) |
| O(6)  | 13271(3) | 7300(2)  | 5591(2) | 32(1) |
| O(7)  | 10449(3) | 6505(2)  | 1853(2) | 27(1) |
| O(8)  | 11346(3) | 9320(2)  | 2538(2) | 31(1) |

---

**Supplementary Table S23. Bond lengths [Å] and angles [°] for 13f.**

---

|             |          |
|-------------|----------|
| Br(1)-C(1)  | 1.927(5) |
| Br(2)-C(16) | 1.903(5) |
| Br(3)-C(31) | 1.904(5) |
| Br(4)-C(46) | 1.915(5) |
| C(1)-C(2)   | 1.374(6) |
| C(1)-C(6)   | 1.404(6) |
| C(2)-C(3)   | 1.394(6) |
| C(3)-C(4)   | 1.360(6) |
| C(4)-C(5)   | 1.412(6) |
| C(5)-C(6)   | 1.424(6) |
| C(5)-C(11)  | 1.431(6) |
| C(6)-C(7)   | 1.459(6) |
| C(7)-C(9)   | 1.389(7) |
| C(7)-C(8)   | 1.467(6) |
| C(8)-N(1)   | 1.276(5) |
| C(9)-O(1)   | 1.367(5) |
| C(9)-C(10)  | 1.421(6) |
| C(10)-C(11) | 1.357(6) |
| C(10)-C(12) | 1.522(6) |
| C(12)-C(13) | 1.507(6) |
| C(13)-C(14) | 1.524(6) |
| C(14)-C(15) | 1.519(6) |
| C(16)-C(17) | 1.375(6) |
| C(16)-C(21) | 1.429(6) |
| C(17)-C(18) | 1.400(6) |
| C(18)-C(19) | 1.353(6) |
| C(19)-C(20) | 1.424(6) |
| C(20)-C(21) | 1.429(6) |
| C(20)-C(26) | 1.429(6) |
| C(21)-C(22) | 1.443(6) |
| C(22)-C(24) | 1.402(6) |
| C(22)-C(23) | 1.479(6) |
| C(23)-N(2)  | 1.285(6) |
| C(24)-O(3)  | 1.345(5) |
| C(24)-C(25) | 1.422(6) |
| C(25)-C(26) | 1.351(6) |
| C(25)-C(27) | 1.514(6) |
| C(27)-C(28) | 1.521(6) |
| C(28)-C(29) | 1.521(6) |
| C(29)-C(30) | 1.522(6) |
| C(31)-C(32) | 1.369(6) |
| C(31)-C(36) | 1.432(6) |
| C(32)-C(33) | 1.402(6) |
| C(33)-C(34) | 1.351(6) |
| C(34)-C(35) | 1.406(6) |
| C(35)-C(41) | 1.405(6) |
| C(35)-C(36) | 1.444(6) |
| C(36)-C(37) | 1.441(6) |
| C(37)-C(39) | 1.399(6) |

|                   |          |
|-------------------|----------|
| C(37)-C(38)       | 1.465(6) |
| C(38)-N(3)        | 1.281(6) |
| C(39)-O(5)        | 1.357(5) |
| C(39)-C(40)       | 1.421(6) |
| C(40)-C(41)       | 1.365(6) |
| C(40)-C(42)       | 1.509(6) |
| C(42)-C(43)       | 1.511(6) |
| C(43)-C(44)       | 1.524(6) |
| C(44)-C(45)       | 1.507(6) |
| C(46)-C(47)       | 1.392(7) |
| C(46)-C(51)       | 1.426(6) |
| C(47)-C(48)       | 1.375(6) |
| C(48)-C(49)       | 1.361(6) |
| C(49)-C(50)       | 1.404(6) |
| C(50)-C(56)       | 1.421(6) |
| C(50)-C(51)       | 1.436(6) |
| C(51)-C(52)       | 1.439(6) |
| C(52)-C(54)       | 1.396(6) |
| C(52)-C(53)       | 1.468(6) |
| C(53)-N(4)        | 1.270(6) |
| C(54)-O(7)        | 1.365(5) |
| C(54)-C(55)       | 1.420(6) |
| C(55)-C(56)       | 1.363(6) |
| C(55)-C(57)       | 1.498(6) |
| C(57)-C(58)       | 1.516(6) |
| C(58)-C(59)       | 1.512(6) |
| C(59)-C(60)       | 1.536(6) |
| N(1)-O(2)         | 1.394(4) |
| N(2)-O(4)         | 1.400(5) |
| N(3)-O(6)         | 1.408(5) |
| N(4)-O(8)         | 1.409(5) |
| C(2)-C(1)-C(6)    | 123.3(5) |
| C(2)-C(1)-Br(1)   | 113.1(4) |
| C(6)-C(1)-Br(1)   | 123.3(4) |
| C(1)-C(2)-C(3)    | 120.5(5) |
| C(4)-C(3)-C(2)    | 118.9(5) |
| C(3)-C(4)-C(5)    | 120.9(5) |
| C(4)-C(5)-C(6)    | 121.5(4) |
| C(4)-C(5)-C(11)   | 118.4(4) |
| C(6)-C(5)-C(11)   | 120.1(4) |
| C(1)-C(6)-C(5)    | 114.7(4) |
| C(1)-C(6)-C(7)    | 128.1(4) |
| C(5)-C(6)-C(7)    | 117.2(4) |
| C(9)-C(7)-C(6)    | 118.8(4) |
| C(9)-C(7)-C(8)    | 119.0(4) |
| C(6)-C(7)-C(8)    | 122.0(4) |
| N(1)-C(8)-C(7)    | 121.0(5) |
| O(1)-C(9)-C(7)    | 121.3(4) |
| O(1)-C(9)-C(10)   | 115.1(4) |
| C(7)-C(9)-C(10)   | 123.4(4) |
| C(11)-C(10)-C(9)  | 117.4(5) |
| C(11)-C(10)-C(12) | 123.6(4) |
| C(9)-C(10)-C(12)  | 119.0(4) |

|                   |          |
|-------------------|----------|
| C(10)-C(11)-C(5)  | 122.6(4) |
| C(13)-C(12)-C(10) | 115.2(4) |
| C(12)-C(13)-C(14) | 112.4(4) |
| C(15)-C(14)-C(13) | 112.0(4) |
| C(17)-C(16)-C(21) | 122.9(4) |
| C(17)-C(16)-Br(2) | 113.7(4) |
| C(21)-C(16)-Br(2) | 123.2(4) |
| C(16)-C(17)-C(18) | 120.7(5) |
| C(19)-C(18)-C(17) | 119.2(5) |
| C(18)-C(19)-C(20) | 121.1(5) |
| C(19)-C(20)-C(21) | 121.4(4) |
| C(19)-C(20)-C(26) | 119.1(4) |
| C(21)-C(20)-C(26) | 119.5(4) |
| C(20)-C(21)-C(16) | 114.3(4) |
| C(20)-C(21)-C(22) | 117.5(4) |
| C(16)-C(21)-C(22) | 128.2(4) |
| C(24)-C(22)-C(21) | 119.3(4) |
| C(24)-C(22)-C(23) | 117.9(4) |
| C(21)-C(22)-C(23) | 122.2(4) |
| N(2)-C(23)-C(22)  | 119.9(5) |
| O(3)-C(24)-C(22)  | 122.2(4) |
| O(3)-C(24)-C(25)  | 115.4(4) |
| C(22)-C(24)-C(25) | 122.4(4) |
| C(26)-C(25)-C(24) | 117.6(5) |
| C(26)-C(25)-C(27) | 123.6(4) |
| C(24)-C(25)-C(27) | 118.8(4) |
| C(25)-C(26)-C(20) | 123.2(5) |
| C(25)-C(27)-C(28) | 115.8(4) |
| C(29)-C(28)-C(27) | 113.5(4) |
| C(28)-C(29)-C(30) | 112.1(4) |
| C(32)-C(31)-C(36) | 122.3(5) |
| C(32)-C(31)-Br(3) | 113.5(4) |
| C(36)-C(31)-Br(3) | 123.9(4) |
| C(31)-C(32)-C(33) | 121.2(5) |
| C(34)-C(33)-C(32) | 119.3(5) |
| C(33)-C(34)-C(35) | 121.1(5) |
| C(41)-C(35)-C(34) | 118.8(4) |
| C(41)-C(35)-C(36) | 119.7(4) |
| C(34)-C(35)-C(36) | 121.5(4) |
| C(31)-C(36)-C(37) | 128.0(4) |
| C(31)-C(36)-C(35) | 114.4(4) |
| C(37)-C(36)-C(35) | 117.6(4) |
| C(39)-C(37)-C(36) | 118.7(4) |
| C(39)-C(37)-C(38) | 118.2(4) |
| C(36)-C(37)-C(38) | 122.6(4) |
| N(3)-C(38)-C(37)  | 121.1(5) |
| O(5)-C(39)-C(37)  | 121.6(4) |
| O(5)-C(39)-C(40)  | 115.0(4) |
| C(37)-C(39)-C(40) | 123.3(4) |
| C(41)-C(40)-C(39) | 117.1(5) |
| C(41)-C(40)-C(42) | 123.6(4) |
| C(39)-C(40)-C(42) | 119.3(4) |
| C(40)-C(41)-C(35) | 123.4(4) |



|                   |          |
|-------------------|----------|
| C(40)-C(42)-C(43) | 116.0(4) |
| C(42)-C(43)-C(44) | 114.1(4) |
| C(45)-C(44)-C(43) | 112.9(4) |
| C(47)-C(46)-C(51) | 122.4(4) |
| C(47)-C(46)-Br(4) | 113.2(4) |
| C(51)-C(46)-Br(4) | 124.3(4) |
| C(48)-C(47)-C(46) | 120.4(5) |
| C(49)-C(48)-C(47) | 120.1(5) |
| C(48)-C(49)-C(50) | 121.1(5) |
| C(49)-C(50)-C(56) | 120.0(4) |
| C(49)-C(50)-C(51) | 121.2(4) |
| C(56)-C(50)-C(51) | 118.8(4) |
| C(46)-C(51)-C(50) | 114.7(4) |
| C(46)-C(51)-C(52) | 126.9(4) |
| C(50)-C(51)-C(52) | 118.4(4) |
| C(54)-C(52)-C(51) | 118.4(4) |
| C(54)-C(52)-C(53) | 117.5(4) |
| C(51)-C(52)-C(53) | 123.5(4) |
| N(4)-C(53)-C(52)  | 121.1(5) |
| O(7)-C(54)-C(52)  | 122.1(4) |
| O(7)-C(54)-C(55)  | 114.1(4) |
| C(52)-C(54)-C(55) | 123.7(4) |
| C(56)-C(55)-C(54) | 116.6(5) |
| C(56)-C(55)-C(57) | 124.3(4) |
| C(54)-C(55)-C(57) | 119.0(4) |
| C(55)-C(56)-C(50) | 123.7(5) |
| C(55)-C(57)-C(58) | 115.0(4) |
| C(59)-C(58)-C(57) | 112.4(4) |
| C(58)-C(59)-C(60) | 112.4(4) |
| C(8)-N(1)-O(2)    | 112.9(4) |
| C(23)-N(2)-O(4)   | 112.0(4) |
| C(38)-N(3)-O(6)   | 112.4(4) |
| C(53)-N(4)-O(8)   | 112.2(4) |

**Supplementary Table S24. Anisotropic displacement parameters [ $\text{\AA}^2 \times 10^3$ ] for 13f. The anisotropic displacement factor exponent takes the form:  $-2\pi^2[h^2a^{*2}U_{11} + \dots + 2hka^*b^*U_{12}]$**

|       | $U_{11}$ | $U_{22}$ | $U_{33}$ | $U_{23}$ | $U_{13}$ | $U_{12}$ |
|-------|----------|----------|----------|----------|----------|----------|
| Br(1) | 38(1)    | 39(1)    | 26(1)    | 11(1)    | 9(1)     | -4(1)    |
| Br(2) | 46(1)    | 25(1)    | 43(1)    | 8(1)     | 16(1)    | 3(1)     |
| Br(3) | 28(1)    | 35(1)    | 32(1)    | 7(1)     | 9(1)     | 1(1)     |
| Br(4) | 43(1)    | 27(1)    | 26(1)    | 3(1)     | 4(1)     | -1(1)    |
| C(1)  | 31(3)    | 35(3)    | 17(3)    | 8(2)     | 2(2)     | 3(2)     |
| C(2)  | 35(3)    | 33(3)    | 15(3)    | 5(2)     | 7(2)     | 10(2)    |
| C(3)  | 36(3)    | 23(3)    | 21(3)    | 6(2)     | 1(2)     | 9(2)     |
| C(4)  | 29(3)    | 30(3)    | 25(3)    | 11(2)    | 3(2)     | 5(2)     |
| C(5)  | 26(3)    | 24(3)    | 20(3)    | 6(2)     | 2(2)     | 4(2)     |
| C(6)  | 25(3)    | 34(3)    | 18(3)    | 14(2)    | -1(2)    | 5(2)     |
| C(7)  | 30(3)    | 19(3)    | 25(3)    | 10(2)    | 0(2)     | 3(2)     |
| C(8)  | 32(3)    | 27(3)    | 18(3)    | 11(2)    | 6(2)     | 3(2)     |
| C(9)  | 33(3)    | 22(3)    | 22(3)    | 7(2)     | 0(2)     | 3(2)     |
| C(10) | 24(3)    | 31(3)    | 23(3)    | 12(2)    | 2(2)     | -1(2)    |
| C(11) | 23(3)    | 26(3)    | 23(3)    | 10(2)    | 3(2)     | 0(2)     |
| C(12) | 32(3)    | 28(3)    | 19(3)    | 7(2)     | 8(2)     | 4(2)     |
| C(13) | 26(3)    | 29(3)    | 20(3)    | 5(2)     | 4(2)     | 3(2)     |
| C(14) | 34(3)    | 32(3)    | 24(3)    | 9(2)     | 6(2)     | 2(2)     |
| C(15) | 45(3)    | 32(3)    | 32(3)    | 14(3)    | 15(3)    | 7(3)     |
| C(16) | 26(3)    | 24(3)    | 24(3)    | 5(2)     | 6(2)     | 4(2)     |
| C(17) | 31(3)    | 25(3)    | 22(3)    | 7(2)     | 7(2)     | 3(2)     |
| C(18) | 31(3)    | 31(3)    | 23(3)    | 15(2)    | 6(2)     | 3(2)     |
| C(19) | 28(3)    | 26(3)    | 27(3)    | 11(2)    | -2(2)    | -1(2)    |
| C(20) | 23(3)    | 27(3)    | 21(3)    | 7(2)     | 2(2)     | 4(2)     |
| C(21) | 26(3)    | 27(3)    | 17(3)    | 8(2)     | 2(2)     | 5(2)     |
| C(22) | 25(3)    | 23(3)    | 22(3)    | 10(2)    | 1(2)     | 5(2)     |
| C(23) | 32(3)    | 30(3)    | 24(3)    | 5(2)     | 3(2)     | 6(2)     |
| C(24) | 26(3)    | 31(3)    | 25(3)    | 14(2)    | 4(2)     | 7(2)     |
| C(25) | 26(3)    | 30(3)    | 18(3)    | 5(2)     | 2(2)     | 6(2)     |
| C(26) | 23(3)    | 26(3)    | 27(3)    | 12(2)    | -3(2)    | 1(2)     |
| C(27) | 28(3)    | 27(3)    | 22(3)    | 11(2)    | 8(2)     | 5(2)     |
| C(28) | 28(3)    | 32(3)    | 24(3)    | 12(2)    | 5(2)     | 7(2)     |
| C(29) | 39(3)    | 29(3)    | 26(3)    | 7(2)     | 10(3)    | 7(3)     |
| C(30) | 50(4)    | 26(3)    | 31(3)    | 7(3)     | 10(3)    | 4(3)     |
| C(31) | 26(3)    | 32(3)    | 19(3)    | 11(2)    | 1(2)     | 3(2)     |
| C(32) | 32(3)    | 35(3)    | 20(3)    | 9(2)     | 4(2)     | 6(2)     |
| C(33) | 35(3)    | 32(3)    | 25(3)    | 4(2)     | -3(3)    | 4(3)     |
| C(34) | 29(3)    | 25(3)    | 24(3)    | 6(2)     | 4(2)     | -1(2)    |
| C(35) | 30(3)    | 26(3)    | 18(3)    | 8(2)     | 2(2)     | 7(2)     |
| C(36) | 25(3)    | 26(3)    | 21(3)    | 8(2)     | 2(2)     | 8(2)     |
| C(37) | 24(3)    | 27(3)    | 18(3)    | 8(2)     | -1(2)    | 5(2)     |
| C(38) | 24(3)    | 31(3)    | 23(3)    | 9(2)     | 4(2)     | 4(2)     |
| C(39) | 29(3)    | 23(3)    | 24(3)    | 9(2)     | 1(2)     | 3(2)     |
| C(40) | 24(3)    | 27(3)    | 24(3)    | 11(2)    | 1(2)     | 1(2)     |
| C(41) | 21(3)    | 27(3)    | 24(3)    | 13(2)    | 0(2)     | 1(2)     |
| C(42) | 28(3)    | 26(3)    | 19(3)    | 2(2)     | 1(2)     | 5(2)     |

|       |       |       |       |       |       |        |
|-------|-------|-------|-------|-------|-------|--------|
| C(43) | 31(3) | 25(3) | 21(3) | 6(2)  | 4(2)  | 2(2)   |
| C(44) | 29(3) | 31(3) | 27(3) | 4(2)  | 7(2)  | 6(2)   |
| C(45) | 34(3) | 35(3) | 30(3) | 8(3)  | 10(3) | -3(3)  |
| C(46) | 30(3) | 17(3) | 28(3) | 9(2)  | -2(2) | 3(2)   |
| C(47) | 36(3) | 33(3) | 18(3) | 7(2)  | 1(2)  | 12(3)  |
| C(48) | 21(3) | 33(3) | 32(3) | 14(3) | 5(2)  | 7(2)   |
| C(49) | 30(3) | 30(3) | 25(3) | 8(2)  | 0(2)  | 0(2)   |
| C(50) | 30(3) | 28(3) | 18(3) | 5(2)  | 6(2)  | 5(2)   |
| C(51) | 28(3) | 26(3) | 22(3) | 8(2)  | 2(2)  | 8(2)   |
| C(52) | 24(3) | 23(3) | 23(3) | 8(2)  | 3(2)  | 5(2)   |
| C(53) | 27(3) | 28(3) | 21(3) | 7(2)  | 2(2)  | 2(2)   |
| C(54) | 26(3) | 25(3) | 22(3) | 13(2) | 3(2)  | 6(2)   |
| C(55) | 27(3) | 28(3) | 27(3) | 13(2) | 2(2)  | 7(2)   |
| C(56) | 27(3) | 25(3) | 19(3) | 8(2)  | -3(2) | -3(2)  |
| C(57) | 28(3) | 29(3) | 23(3) | 4(2)  | 5(2)  | 6(2)   |
| C(58) | 27(3) | 33(3) | 21(3) | 7(2)  | 5(2)  | 5(2)   |
| C(59) | 31(3) | 32(3) | 24(3) | 7(2)  | 4(2)  | 6(2)   |
| C(60) | 39(3) | 36(3) | 24(3) | 6(3)  | 9(3)  | 10(3)  |
| N(1)  | 29(2) | 25(2) | 23(2) | 8(2)  | 2(2)  | -6(2)  |
| N(2)  | 32(3) | 31(3) | 29(3) | 10(2) | 6(2)  | -4(2)  |
| N(3)  | 24(2) | 29(2) | 29(3) | 11(2) | 4(2)  | -2(2)  |
| N(4)  | 33(3) | 25(2) | 28(3) | 10(2) | 0(2)  | 2(2)   |
| O(1)  | 37(2) | 23(2) | 31(2) | 7(2)  | 6(2)  | -2(2)  |
| O(2)  | 35(2) | 29(2) | 29(2) | 5(2)  | 8(2)  | -7(2)  |
| O(3)  | 35(2) | 28(2) | 31(2) | 13(2) | 13(2) | -2(2)  |
| O(4)  | 39(2) | 33(2) | 31(2) | 6(2)  | 9(2)  | -10(2) |
| O(5)  | 32(2) | 24(2) | 25(2) | 5(2)  | 7(2)  | -3(2)  |
| O(6)  | 30(2) | 31(2) | 38(2) | 16(2) | 11(2) | -1(2)  |
| O(7)  | 31(2) | 27(2) | 25(2) | 10(2) | 10(2) | 0(2)   |
| O(8)  | 34(2) | 22(2) | 38(2) | 14(2) | 10(2) | 2(2)   |

---

**Supplementary Table S25. Hydrogen coordinates [ $\times 10^4$ ] and isotropic displacement parameters [ $\text{\AA}^2 \times 10^3$ ] for 13f.**

|        | x     | y     | z     | U(eq) |
|--------|-------|-------|-------|-------|
| H(2)   | 9518  | 7547  | 344   | 33    |
| H(3)   | 8047  | 6378  | 623   | 32    |
| H(4)   | 6603  | 6921  | 1524  | 33    |
| H(8)   | 10266 | 10643 | 2000  | 30    |
| H(11)  | 5831  | 8187  | 2492  | 28    |
| H(12A) | 6080  | 10221 | 3892  | 31    |
| H(12B) | 5035  | 10503 | 3398  | 31    |
| H(13A) | 5004  | 8604  | 3587  | 31    |
| H(13B) | 3958  | 8885  | 3090  | 31    |
| H(14A) | 4173  | 9908  | 4555  | 36    |
| H(14B) | 3012  | 10000 | 4034  | 36    |
| H(15A) | 2179  | 8344  | 3870  | 52    |
| H(15B) | 2213  | 8970  | 4679  | 52    |
| H(15C) | 3356  | 8233  | 4376  | 52    |
| H(17)  | 2766  | 3370  | 11258 | 31    |
| H(18)  | 1886  | 1739  | 11116 | 32    |
| H(19)  | 2594  | 444   | 10221 | 32    |
| H(23)  | 6671  | 3724  | 10112 | 35    |
| H(26)  | 3994  | -201  | 9248  | 29    |
| H(27A) | 6739  | -427  | 8345  | 30    |
| H(27B) | 5730  | -166  | 7826  | 30    |
| H(28A) | 5021  | -1505 | 8577  | 32    |
| H(28B) | 4016  | -1246 | 8052  | 32    |
| H(29A) | 6406  | -2240 | 7631  | 38    |
| H(29B) | 5364  | -2005 | 7111  | 38    |
| H(30A) | 4708  | -3315 | 7894  | 54    |
| H(30B) | 4993  | -3678 | 7081  | 54    |
| H(30C) | 3692  | -3096 | 7355  | 54    |
| H(32)  | 12577 | 2295  | 3662  | 34    |
| H(33)  | 10692 | 1294  | 3797  | 38    |
| H(34)  | 9322  | 1886  | 4714  | 32    |
| H(38)  | 12758 | 5634  | 4935  | 31    |
| H(41)  | 8747  | 3138  | 5726  | 28    |
| H(42A) | 8175  | 5406  | 6685  | 31    |
| H(42B) | 9246  | 5164  | 7185  | 31    |
| H(43A) | 8172  | 3516  | 6881  | 31    |
| H(43B) | 7042  | 3848  | 6458  | 31    |
| H(44A) | 7527  | 4755  | 7922  | 36    |
| H(44B) | 6313  | 4963  | 7480  | 36    |
| H(45A) | 5400  | 3304  | 7259  | 51    |
| H(45B) | 5507  | 3898  | 8074  | 51    |
| H(45C) | 6591  | 3129  | 7730  | 51    |
| H(47)  | 6672  | 8403  | 4784  | 35    |
| H(48)  | 5375  | 6898  | 4490  | 33    |
| H(49)  | 5870  | 5599  | 3535  | 34    |

|        |       |       |      |    |
|--------|-------|-------|------|----|
| H(53)  | 9439  | 8904  | 3059 | 30 |
| H(56)  | 7162  | 4919  | 2524 | 28 |
| H(57A) | 10036 | 4638  | 1605 | 33 |
| H(57B) | 8880  | 4865  | 1140 | 33 |
| H(58A) | 8391  | 3599  | 1968 | 33 |
| H(58B) | 7336  | 3762  | 1422 | 33 |
| H(59A) | 9760  | 2794  | 1067 | 35 |
| H(59B) | 8801  | 3019  | 508  | 35 |
| H(60A) | 7974  | 1735  | 1292 | 50 |
| H(60B) | 8359  | 1348  | 493  | 50 |
| H(60C) | 7047  | 1941  | 713  | 50 |
| H(1)   | 7947  | 11666 | 3070 | 46 |
| H(2A)  | 10607 | 12854 | 2874 | 49 |
| H(3A)  | 7330  | 2117  | 8609 | 46 |
| H(4A)  | 8976  | 4191  | 9185 | 54 |
| H(5)   | 11347 | 6467  | 6436 | 42 |
| H(6)   | 14082 | 7179  | 5553 | 48 |
| H(7)   | 10828 | 7081  | 1948 | 41 |
| H(8A)  | 11977 | 9305  | 2265 | 46 |

---

**Supplementary Table S26. Torsion angles [°] for 13f.**

---

|                       |           |
|-----------------------|-----------|
| C(6)-C(1)-C(2)-C(3)   | 2.2(8)    |
| Br(1)-C(1)-C(2)-C(3)  | -172.7(4) |
| C(1)-C(2)-C(3)-C(4)   | 2.5(7)    |
| C(2)-C(3)-C(4)-C(5)   | -3.7(7)   |
| C(3)-C(4)-C(5)-C(6)   | 0.3(7)    |
| C(3)-C(4)-C(5)-C(11)  | -179.1(4) |
| C(2)-C(1)-C(6)-C(5)   | -5.4(7)   |
| Br(1)-C(1)-C(6)-C(5)  | 169.0(3)  |
| C(2)-C(1)-C(6)-C(7)   | 174.5(5)  |
| Br(1)-C(1)-C(6)-C(7)  | -11.2(7)  |
| C(4)-C(5)-C(6)-C(1)   | 4.1(7)    |
| C(11)-C(5)-C(6)-C(1)  | -176.5(4) |
| C(4)-C(5)-C(6)-C(7)   | -175.7(4) |
| C(11)-C(5)-C(6)-C(7)  | 3.7(6)    |
| C(1)-C(6)-C(7)-C(9)   | 173.1(5)  |
| C(5)-C(6)-C(7)-C(9)   | -7.1(6)   |
| C(1)-C(6)-C(7)-C(8)   | -12.1(7)  |
| C(5)-C(6)-C(7)-C(8)   | 167.8(4)  |
| C(9)-C(7)-C(8)-N(1)   | -22.7(7)  |
| C(6)-C(7)-C(8)-N(1)   | 162.4(4)  |
| C(6)-C(7)-C(9)-O(1)   | -177.4(4) |
| C(8)-C(7)-C(9)-O(1)   | 7.6(7)    |
| C(6)-C(7)-C(9)-C(10)  | 7.1(7)    |
| C(8)-C(7)-C(9)-C(10)  | -167.9(4) |
| O(1)-C(9)-C(10)-C(11) | -178.9(4) |
| C(7)-C(9)-C(10)-C(11) | -3.2(7)   |
| O(1)-C(9)-C(10)-C(12) | 1.2(6)    |
| C(7)-C(9)-C(10)-C(12) | 176.9(4)  |

|                         |           |
|-------------------------|-----------|
| C(9)-C(10)-C(11)-C(5)   | -0.6(7)   |
| C(12)-C(10)-C(11)-C(5)  | 179.3(4)  |
| C(4)-C(5)-C(11)-C(10)   | 179.6(4)  |
| C(6)-C(5)-C(11)-C(10)   | 0.2(7)    |
| C(11)-C(10)-C(12)-C(13) | -2.2(7)   |
| C(9)-C(10)-C(12)-C(13)  | 177.7(4)  |
| C(10)-C(12)-C(13)-C(14) | -179.8(4) |
| C(12)-C(13)-C(14)-C(15) | -170.2(4) |
| C(21)-C(16)-C(17)-C(18) | -2.3(8)   |
| Br(2)-C(16)-C(17)-C(18) | 172.7(4)  |
| C(16)-C(17)-C(18)-C(19) | -2.1(7)   |
| C(17)-C(18)-C(19)-C(20) | 2.9(7)    |
| C(18)-C(19)-C(20)-C(21) | 0.5(7)    |
| C(18)-C(19)-C(20)-C(26) | -177.7(4) |
| C(19)-C(20)-C(21)-C(16) | -4.5(7)   |
| C(26)-C(20)-C(21)-C(16) | 173.7(4)  |
| C(19)-C(20)-C(21)-C(22) | 177.2(4)  |
| C(26)-C(20)-C(21)-C(22) | -4.6(6)   |
| C(17)-C(16)-C(21)-C(20) | 5.4(7)    |
| Br(2)-C(16)-C(21)-C(20) | -169.1(3) |
| C(17)-C(16)-C(21)-C(22) | -176.5(5) |
| Br(2)-C(16)-C(21)-C(22) | 8.9(7)    |
| C(20)-C(21)-C(22)-C(24) | 7.8(7)    |
| C(16)-C(21)-C(22)-C(24) | -170.2(5) |
| C(20)-C(21)-C(22)-C(23) | -163.8(4) |
| C(16)-C(21)-C(22)-C(23) | 18.1(7)   |
| C(24)-C(22)-C(23)-N(2)  | 16.7(7)   |
| C(21)-C(22)-C(23)-N(2)  | -171.5(4) |
| C(21)-C(22)-C(24)-O(3)  | 176.0(4)  |
| C(23)-C(22)-C(24)-O(3)  | -12.0(7)  |
| C(21)-C(22)-C(24)-C(25) | -6.5(7)   |
| C(23)-C(22)-C(24)-C(25) | 165.5(4)  |
| O(3)-C(24)-C(25)-C(26)  | 179.1(4)  |
| C(22)-C(24)-C(25)-C(26) | 1.5(7)    |
| O(3)-C(24)-C(25)-C(27)  | 1.1(6)    |
| C(22)-C(24)-C(25)-C(27) | -176.6(4) |
| C(24)-C(25)-C(26)-C(20) | 2.0(7)    |
| C(27)-C(25)-C(26)-C(20) | 180.0(4)  |
| C(19)-C(20)-C(26)-C(25) | 177.9(5)  |
| C(21)-C(20)-C(26)-C(25) | -0.4(7)   |
| C(26)-C(25)-C(27)-C(28) | 6.5(7)    |
| C(24)-C(25)-C(27)-C(28) | -175.6(4) |
| C(25)-C(27)-C(28)-C(29) | -179.6(4) |
| C(27)-C(28)-C(29)-C(30) | 178.2(4)  |
| C(36)-C(31)-C(32)-C(33) | -1.1(7)   |
| Br(3)-C(31)-C(32)-C(33) | 172.5(4)  |
| C(31)-C(32)-C(33)-C(34) | -2.2(7)   |
| C(32)-C(33)-C(34)-C(35) | 1.7(8)    |
| C(33)-C(34)-C(35)-C(41) | -177.6(5) |
| C(33)-C(34)-C(35)-C(36) | 2.1(7)    |
| C(32)-C(31)-C(36)-C(37) | -177.1(5) |
| Br(3)-C(31)-C(36)-C(37) | 10.0(7)   |
| C(32)-C(31)-C(36)-C(35) | 4.5(7)    |

|                         |           |
|-------------------------|-----------|
| Br(3)-C(31)-C(36)-C(35) | -168.4(3) |
| C(41)-C(35)-C(36)-C(31) | 174.7(4)  |
| C(34)-C(35)-C(36)-C(31) | -5.0(7)   |
| C(41)-C(35)-C(36)-C(37) | -3.8(7)   |
| C(34)-C(35)-C(36)-C(37) | 176.5(4)  |
| C(31)-C(36)-C(37)-C(39) | -172.8(5) |
| C(35)-C(36)-C(37)-C(39) | 5.5(6)    |
| C(31)-C(36)-C(37)-C(38) | 15.7(7)   |
| C(35)-C(36)-C(37)-C(38) | -166.0(4) |
| C(39)-C(37)-C(38)-N(3)  | 16.7(7)   |
| C(36)-C(37)-C(38)-N(3)  | -171.7(4) |
| C(36)-C(37)-C(39)-O(5)  | 177.5(4)  |
| C(38)-C(37)-C(39)-O(5)  | -10.6(7)  |
| C(36)-C(37)-C(39)-C(40) | -4.0(7)   |
| C(38)-C(37)-C(39)-C(40) | 167.9(4)  |
| O(5)-C(39)-C(40)-C(41)  | 179.0(4)  |
| C(37)-C(39)-C(40)-C(41) | 0.4(7)    |
| O(5)-C(39)-C(40)-C(42)  | 1.2(6)    |
| C(37)-C(39)-C(40)-C(42) | -177.4(4) |
| C(39)-C(40)-C(41)-C(35) | 1.5(7)    |
| C(42)-C(40)-C(41)-C(35) | 179.2(4)  |
| C(34)-C(35)-C(41)-C(40) | 180.0(4)  |
| C(36)-C(35)-C(41)-C(40) | 0.3(7)    |
| C(41)-C(40)-C(42)-C(43) | 7.9(7)    |
| C(39)-C(40)-C(42)-C(43) | -174.5(4) |
| C(40)-C(42)-C(43)-C(44) | 173.5(4)  |
| C(42)-C(43)-C(44)-C(45) | -173.4(4) |
| C(51)-C(46)-C(47)-C(48) | 1.5(7)    |
| Br(4)-C(46)-C(47)-C(48) | -174.3(3) |
| C(46)-C(47)-C(48)-C(49) | 1.9(7)    |
| C(47)-C(48)-C(49)-C(50) | -2.4(7)   |
| C(48)-C(49)-C(50)-C(56) | 178.5(4)  |
| C(48)-C(49)-C(50)-C(51) | -0.5(7)   |
| C(47)-C(46)-C(51)-C(50) | -4.1(7)   |
| Br(4)-C(46)-C(51)-C(50) | 171.3(3)  |
| C(47)-C(46)-C(51)-C(52) | 177.9(5)  |
| Br(4)-C(46)-C(51)-C(52) | -6.7(7)   |
| C(49)-C(50)-C(51)-C(46) | 3.6(7)    |
| C(56)-C(50)-C(51)-C(46) | -175.4(4) |
| C(49)-C(50)-C(51)-C(52) | -178.3(4) |
| C(56)-C(50)-C(51)-C(52) | 2.7(7)    |
| C(46)-C(51)-C(52)-C(54) | 172.2(4)  |
| C(50)-C(51)-C(52)-C(54) | -5.6(7)   |
| C(46)-C(51)-C(52)-C(53) | -17.0(8)  |
| C(50)-C(51)-C(52)-C(53) | 165.2(4)  |
| C(54)-C(52)-C(53)-N(4)  | -25.7(7)  |
| C(51)-C(52)-C(53)-N(4)  | 163.5(5)  |
| C(51)-C(52)-C(54)-O(7)  | -176.8(4) |
| C(53)-C(52)-C(54)-O(7)  | 11.9(7)   |
| C(51)-C(52)-C(54)-C(55) | 4.7(7)    |
| C(53)-C(52)-C(54)-C(55) | -166.6(4) |
| O(7)-C(54)-C(55)-C(56)  | -179.2(4) |
| C(52)-C(54)-C(55)-C(56) | -0.6(7)   |

|                         |           |
|-------------------------|-----------|
| O(7)-C(54)-C(55)-C(57)  | 0.0(6)    |
| C(52)-C(54)-C(55)-C(57) | 178.6(4)  |
| C(54)-C(55)-C(56)-C(50) | -2.7(7)   |
| C(57)-C(55)-C(56)-C(50) | 178.2(4)  |
| C(49)-C(50)-C(56)-C(55) | -177.5(5) |
| C(51)-C(50)-C(56)-C(55) | 1.6(7)    |
| C(56)-C(55)-C(57)-C(58) | -6.9(7)   |
| C(54)-C(55)-C(57)-C(58) | 174.1(4)  |
| C(55)-C(57)-C(58)-C(59) | -173.1(4) |
| C(57)-C(58)-C(59)-C(60) | -175.2(4) |
| C(7)-C(8)-N(1)-O(2)     | 177.8(4)  |
| C(22)-C(23)-N(2)-O(4)   | -173.3(4) |
| C(37)-C(38)-N(3)-O(6)   | -173.1(4) |
| C(52)-C(53)-N(4)-O(8)   | 177.3(4)  |
